# Supplementary material for: Distinct insight into the use of difunctional double-decker silsesquioxanes as building blocks for alternating A–B type macromolecular frameworks
Source: Royal Society of Chemistry journal article supplement (doi:10.1039/d2qi02161g), 2022-12-12
Supplement: d2qi02161g1.pdf [file d2qi02161g1.pdf]

*Supporting Information for*

**Distinct insight into the use of difunctional double-decker  
silsesquioxanes as building blocks for alternating A-B type  
macromolecular frameworks**

Julia Duszczyk<sup>a,b</sup>, Aleksandra Mrzygłód<sup>a,b</sup>, Katarzyna Mituła<sup>a,b</sup>, Michał Dutkiewicz<sup>c</sup>, Rafał Januszewski<sup>a,b</sup>, Monika Rzonsowska<sup>a,b</sup>, Beata Dudziec<sup>\*a,b</sup>, Marek Nowicki<sup>b,d</sup>, Maciej Kubicki<sup>a</sup>

<sup>a</sup>Faculty of Chemistry, Adam Mickiewicz University in Poznan, Uniwersytetu Poznańskiego 8, 61-614 Poznan, Poland.

E-mail: [beata.dudziec@gmail.com](mailto:beata.dudziec@gmail.com)

<sup>b</sup>Centre for Advanced Technologies, Adam Mickiewicz University in Poznan, Uniwersytetu Poznańskiego 10, 61-614 Poznan, Poland

<sup>c</sup>Adam Mickiewicz University Foundation, Poznań Science and Technology Park, Rubież 46, 61-612 Poznań, Poland

<sup>d</sup>Institute of Physics, Poznan University of Technology, Piotrowo 3, 60-965 Poznan, Poland

**Table of contents:**

|       |                                                                                                                                                                                  |            |
|-------|----------------------------------------------------------------------------------------------------------------------------------------------------------------------------------|------------|
| 1.    | General Considerations                                                                                                                                                           | ••• S -2-  |
| 1.1   | Measurements                                                                                                                                                                     | ••• S -2-  |
| 1.2   | Synthetic procedures                                                                                                                                                             | ••• S -4-  |
| 1.2.1 | General synthetic procedure for DDSQ-2OSiVi ( <b>1c</b> ) obtained <i>via</i> condensation reaction                                                                              | ••• S -4-  |
| 1.2.2 | General synthetic procedure for difunctional DDSQ molecular compounds obtained <i>via</i> hydrosilylation reaction                                                               | ••• S -5-  |
| 1.2.3 | General synthetic procedure for linear DDSQ-based co-oligomers (type 6 and 7) obtained <i>via</i> hydrosilylation reaction – exemplary reaction for the synthesis of <b>7b-d</b> | ••• S -5-  |
| 2.    | Additional information on the hydrosilylation reaction                                                                                                                           | ••• S -6-  |
| 2.1   | General synthetic procedure for checking the reactivity of the catalyst                                                                                                          | ••• S -6-  |
| 2.2   | Synthetic procedure for dimethylphenyl(2-phenylethyl)silane obtained <i>via</i> hydrosilylation reaction- checking the reaction time                                             | ••• S -6-  |
| 3.    | List of isolated compounds                                                                                                                                                       | ••• S -7-  |
| 4.    | Analytical data of obtained products incl. <sup>1</sup> H, <sup>13</sup> C, <sup>29</sup> Si NMR spectra                                                                         | ••• S -8-  |
| 5.    | GPC analysis of obtained products                                                                                                                                                | ••• S -34- |
| 6.    | TGA analysis of obtained products                                                                                                                                                | ••• S -43- |
| 7.    | Solubility tests of selected products                                                                                                                                            | ••• S -44- |
| 8.    | Young's Modulus and Hardness                                                                                                                                                     | ••• S -44- |
| 9.    | References                                                                                                                                                                       | ••• S -45- |

## 1. General Considerations:

The chemicals were purchased from the following sources: Hybrid Plastics for DDSQ tetrasilanol form ( $C_{48}H_{44}O_{14}Si_8$ ) (DDSQ-4OH); Sigma-Aldrich for dichloromethane (DCM), tetrahydrofuran (THF), toluene, methanol, acetonitrile, *n*-hexane, chloroform-*d*, Karstedt's catalyst – 2% xylene solution, chlorosilanes (dichloromethylsilane, dichloromethylvinylsilane and chloro(dimethyl)vinylsilane), dimethylphenylsilane, dimethylphenylvinylsilane, 1,1,3,3-tetramethyldisiloxane, 1,3-divinyltetramethyldisiloxane, 1,4-bis(dimethylsilyl)benzene, magnesium, vinylmagnesium bromide solution 1M in THF, 4Å molecular sieves, triethylamine and silica gel 60; Deutero for dichloromethane-*d*<sub>2</sub>; Fluorochem for 1,2-bis(chlorodimethylsilyl)ethane and 1,1,3,3,5,5-hexamethyltrisiloxane; ABCR for 1,1,3,3-tetramethyldisilazane; TCI for 1,4-dibromobenzene; Alfa Aesar for platinum(IV) oxide. Following double-decker silsesquioxanes: DDSQ-2SiH (**1a**), DDSQ-2SiVi (**1b**), DDSQ-2OSiVi (**1c**) were prepared according to the literature procedures<sup>1-3</sup> so as the DDSQ-2SiOH,<sup>3</sup> 1,4-bis(vinyl dimethylsilyl)benzene,<sup>4</sup> 1,2-bis(dimethylvinylsilyl)ethane<sup>5</sup> and 1,2-bis(dimethylsilyl)-ethane.<sup>6</sup> All solvents were dried over CaH<sub>2</sub> prior to use and stored under argon over 4Å molecular sieves. All liquid substrates were also dried and degassed by bulb-to-bulb distillation. All syntheses were conducted under argon atmosphere using standard Schlenk-line and vacuum techniques.

### 1.1 Measurements

#### Nuclear Magnetic Resonance (NMR)

<sup>1</sup>H, <sup>13</sup>C, and <sup>29</sup>Si Nuclear Magnetic Resonance (NMR) were performed on Bruker Ultra Shield 400 and 300 spectrometers using CDCl<sub>3</sub> and CD<sub>2</sub>Cl<sub>2</sub> as a solvents. Chemical shifts are reported in ppm with reference to the residual solvents peaks for <sup>1</sup>H and <sup>13</sup>C and to TMS for <sup>29</sup>Si NMR.

#### FT-IR spectroscopy

Fourier Transform-Infrared (FT-IR) spectra were recorded on a Nicolet iS5 (Thermo Scientific) spectrophotometer equipped with a single reflection diamond ATR unit. In all cases, 16 scans at a resolution of 2 cm<sup>-1</sup> were collected, to record the spectra in a range of 4000-650cm<sup>-1</sup>.

Real-time *in situ* FT-IR analyses were performed on a Mettler Toledo ReactIR 15 equipped with a DS 6.3mm AgX Di Comp Fiber Probe with a diamond window along with a Mercury Cadmium Telluride detector. In each case, 256 scans were recorded at a resolution of 1 cm<sup>-1</sup> in 1, 2, 5, and 10 min intervals.

#### Thermogravimetric Analysis (TGA)

The analyses were performed using a TGA/DSC 1 Mettler-Toledo thermal gravimetric apparatus. The analyses were performed in an air atmosphere (flow of 60 mL/min), from ambient temperature to 1000 °C at the heating rate of 10 °C/min. The temperature of initial degradation (T<sup>5%</sup>) was taken as the onset temperature at which 5 wt% of mass loss occurs.

#### Elemental Analysis.

Elemental analyses were performed using a Vario EL III instrument.

#### Gel Permeation Chromatography (GPC)

Gel permeation chromatography analyses were performed using a Waters Alliance 2695 system equipped with a Waters 2412 RI detector and a set of three serially connected 7.8x300 mm columns (Water Styragel HR1, HR2, and HR4). THF was used as a mobile phase at a flow rate of 0.6 mL/min; column oven temperature was 35 °C and detector temperature 40 °C. Molecular weight ( $M_n$ ,  $M_w$ ) and

polydispersity index ( $\mathcal{D}$ ) values were calculated based on a polynomial calibration curve using polystyrene standards (Shodex) in a range from  $1.31 \times 10^3$  to  $3.64 \times 10^6$  Da.

### Gas Chromatography coupled with Mass Spectrometry (GCMS)

Mass spectra of compounds were acquired by gas chromatograph mass spectrometer (GCMS) analysis on a Bruker Scion 436-GC with a 30 m Varian DB-5 0.25 mm capillary column and a Scion SQ-MS mass spectrometry detector.

### X-ray crystallography

Diffraction data were collected by the  $\omega$ -scan technique at 100(1) K on Rigaku XCalibur four-circle diffractometer with EOS CCD detector and graphite-monochromated MoK $_{\alpha}$  radiation ( $\lambda=0.71073$  Å). The data were corrected for Lorentz-polarization as well as for absorption effects.<sup>7</sup> Precise unit-cell parameters were determined by a least-squares fit of 14314 (**1b**) and 5949 (**1c**) reflections of the highest intensity, chosen from the whole experiment. The structures were solved with SHELXT-2013<sup>8</sup> and refined with the full-matrix least-squares procedure on F<sup>2</sup> by SHELXL-2013.<sup>9</sup> All non-hydrogen atoms were refined anisotropically, hydrogen atoms were placed in idealized positions and refined as ‘riding model’ with isotropic displacement parameters set at 1.2 (1.5 for CH<sub>3</sub>) times  $U_{eq}$  of appropriate carrier atoms. In the structure **1b** a disorder has been found: the methyl and vinyl groups interchange each other with site occupation factors of 0.670(6) and 0.330(6). In **1c** in turn, one of the C=C distances (C123-C124) was constrained to the typical value.

Crystal data: **1b**: C<sub>54</sub>H<sub>52</sub>O<sub>14</sub>Si<sub>10</sub>,  $M_r=1205.85$ , monoclinic, P2<sub>1</sub>/c,  $a = 10.58660(10)$  Å,  $b = 18.1559(3)$  Å,  $c = 15.2045(2)$  Å,  $\beta = 93.6360(10)^\circ$ ,  $V = 2916.56(7)$  Å<sup>3</sup>,  $Z = 2$ ,  $F(000) = 1256$ ,  $d_x = 1.373$  g·cm<sup>-3</sup>,  $\mu = 0.289$  mm<sup>-1</sup>. 27755 reflections collected up to  $2\Theta = 26.8^\circ$ , of which 5847 independent ( $R_{int} = 0.016$ ), 5529 with  $I > 2\sigma(I)$ . Final  $R(F)$  [ $I > 2\sigma(I)$ ] = 0.0345,  $wR(F^2)$  [ $I > 2\sigma(I)$ ] = 0.0916,  $R(F)$  [all data] = 0.0365,  $wR(F^2)$  [all data] = 0.0933,  $S = 1.03$ ,  $\max/\min \Delta\rho = 0.43/-0.53$  e·Å<sup>-3</sup>.

**1c**: C<sub>58</sub>H<sub>64</sub>O<sub>16</sub>Si<sub>12</sub>,  $M_r=1354.17$ , triclinic, P-1,  $a = 13.5310(9)$  Å,  $b = 14.1236(9)$  Å,  $c = 19.7262(12)$  Å,  $\alpha = 91.086(5)^\circ$ ,  $\beta = 101.240(6)^\circ$ ,  $\gamma = 113.236(6)^\circ$ ,  $V = 3378.3(4)$  Å<sup>3</sup>,  $Z = 2$ ,  $F(000) = 5949$ ,  $d_x = 1.331$  g·cm<sup>-3</sup>,  $\mu = 0.293$  mm<sup>-1</sup>. 22904 reflections collected up to  $2\Theta = 25.0^\circ$ , of which 11804 independent ( $R_{int} = 0.037$ ), 8560 with  $I > 2\sigma(I)$ . Final  $R(F)$  [ $I > 2\sigma(I)$ ] = 0.0807,  $wR(F^2)$  [ $I > 2\sigma(I)$ ] = 0.1815,  $R(F)$  [all data] = 0.1098,  $wR(F^2)$  [all data] = 0.1951,  $S = 1.03$ ,  $\max/\min \Delta\rho = 1.25/-1.19$  e·Å<sup>-3</sup>.

Crystallographic data for the structural analysis has been deposited with the Cambridge Crystallographic Data Centre, Nos. CCDC-1972875 (**1b**) and 1891035 (**1c**). Copies of this information may be obtained free of charge from: The Director, CCDC, 12 Union Road, Cambridge, CB2 1EZ, UK; e-mail: deposit@ccdc.cam.ac.uk, or www: [www.ccdc.cam.ac.uk](http://www.ccdc.cam.ac.uk).

### Water contact angles (WCAs)

Water contact angles of polymer-coated stainless steel or glass plates were measured using a Krüss GmbH DSA 100E Drop Shape Analyzer equipped with a software-controlled (DAS4 2.0): x, y, z-axis table, quadruple dosing unit with zoom, and focus adjustment, illumination, and a camera with 780 × 580 pix resolution. All presented data are arithmetic means of values measured for 3 drops (5 μL) per sample.

### Nanoindentation technique

Mechanical parameters were determined using the nanoindentation technique. This technique allows to calculate them also for thin layers and small volumes of polymer materials.<sup>10,11</sup> The measurements were taken with Berkovich tip geometry and an Agilent G200 indenter. The device was calibrated by standard method before measurements.<sup>12</sup> The elasticity modulus and hardness of layers made of synthesized polymers were determined. The indentation depth was up to 1000 nm. Measurements were carried out in CSM mode with a DCMII indenter head. Tests were performed at a temperature of 19 °C and at a humidity of 50%. The apparatus simultaneously records the force applied to the probe pressed into the surface and the indentation depth. Applied loading curves contain a segment retaining the maximum force for 10 seconds. For each sample, at least 10 tests were performed, and the results were averaged.

### Scanning electron microscopy

Scanning electron microscopy (SEM) images were taken using an FEI Quanta 250 FEG microscope equipped with an EDAX EDS detector. Images were taken in high vacuum mode, and accelerating voltage (5 kV). Thin films of selected samples were fabricated on glass plates using the spin-coating technique. Thin films in one layer were prepared by a spin-coating technique using 5-10 wt% solution of compounds in DCM that was deposited on the glass plates (spin speed of 100 rpm for 40 sec.) to form a homogeneous surface. The film thickness was in the range of ca. 400-700 nm.

## 1.2 Synthetic procedures

### 1.2.1 General synthetic procedure for DDSQ-2OSiVi (**1c**) obtained *via* condensation reaction

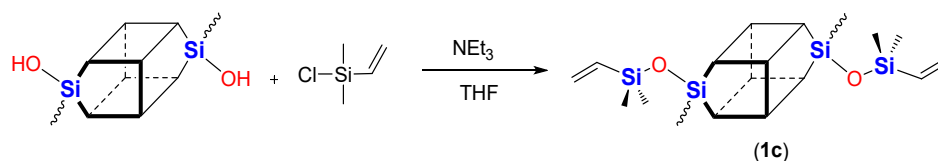

The synthesis was based on the hydrolytic condensation of DDSQ-2SiOH with chloro(dimethyl)vinylsilane carried out in the presence of triethylamine under argon atmosphere. A Schlenk flask, placed on ice bath, was charged with dry THF (11 mL), DDSQ-2SiOH (0.478 g, 0.40 mmol), triethylamine (0.22 mL, 1.60 mmol), followed chloro(dimethyl)vinylsilane (0.134 mL, 0.96 mmol) introduced by dropping to the obtained solution. The reaction mixture became cloudy as a result of hydrochloride formation and consequently [HNEt<sub>3</sub>]Cl was observed as a white solid. After one hour, the mixture was warmed to room temperature and kept at stirring for 23 hours. Then the post-reaction mixture was subjected to filtration to remove the formed triethylamine hydrochloride and the filtrate was evaporated under reduced pressure. The crude product was dissolved in DCM and precipitated in MeOH. After decantation, the remains of MeOH were evaporated and DDSQ-2OSiVi (**1c**) was isolated as a white solid in 34% yield. The methanol decant was left again at 4 °C (in the refrigerator) for 1 week. After this time, there was additional precipitation of **1c** observed. This gradual precipitation was repeated 3 times and finally, **1c** was isolated as white solid, with a total yield of 94%. While this procedure, fine crystals were also obtained and subjected to XRD analysis, and also its structure was confirmed *via* spectroscopic analysis (see p. S-8-).



## 2. Additional information on the hydrosilylation reaction

### 2.1 General synthetic procedure for checking the reactivity of the catalyst

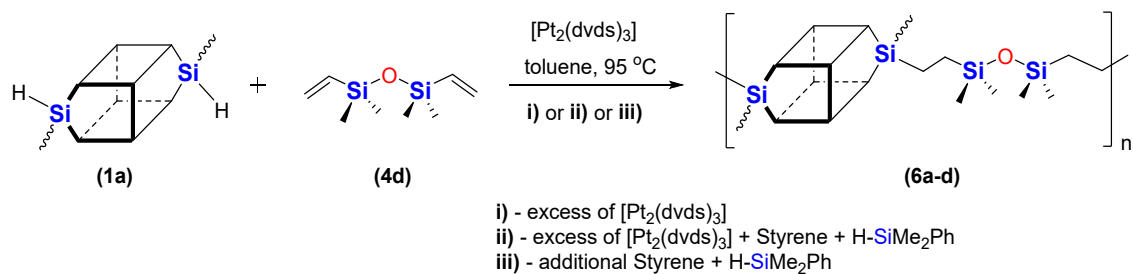

To a two-neck round-bottom flask equipped with a condenser and magnetic stirrer, **1a** (0.081 g, 0.07 mmol) was placed in an argon atmosphere along with anhydrous toluene (3.0 mL), 1,3-divinyltetramethyldisiloxane (**4d**) (0.017 mL, 0.07 mmol) and  $[\text{Pt}_2(\text{dvds})_3]$  (1.605  $\mu\text{L}$ ,  $1.4 \times 10^{-7}$  mol). The reaction mixture was kept at  $95\text{ }^\circ\text{C}$  for 72 hours.

- The excess of  $[\text{Pt}_2(\text{dvds})_3]$  (1.6  $\mu\text{L}$ ,  $1.4 \times 10^{-7}$  mol) was added and the reaction mixture was kept at the same temperature next 24 hours. After cooling it to room temperature, the excess disiloxane and solvent were evaporated under a vacuum. Next GPC analysis was performed.
- The excess of  $[\text{Pt}_2(\text{dvds})_3]$  (9.8  $\mu\text{L}$ ,  $8.6 \times 10^{-7}$  mol) was added and mixed for 15 minutes. Styrene (100  $\mu\text{L}$ , 0.86 mmol) and dimethylphenylsilane (142  $\mu\text{L}$ , 0.91 mmol) was added and the reaction mixture was kept at the same temperature next 24 hours. After cooling it to room temperature, cold hexane (12 mL) was added to precipitate oligomers. The precipitate was filtered off on a syringe filter (0.2  $\mu\text{m}$ ). Next GC-MS analysis of the solution was performed. The styrene conversion was estimated at 92%.
- Styrene (100  $\mu\text{L}$ , 0.86 mmol) and dimethylphenylsilane (142  $\mu\text{L}$ , 0.91 mmol) was added and the reaction mixture was kept at the same temperature next 24 hours. After cooling it to room temperature, cold hexane (12 mL) was added to precipitate oligomers. The precipitate was filtered off on a syringe filter (0.2  $\mu\text{m}$ ). Next GCMS analysis of the solution was performed that revealed 68% conversion of styrene.

### 2.2 Synthetic procedure for dimethylphenyl(2-phenylethyl)silane obtained *via* hydrosilylation reaction- checking the reaction time

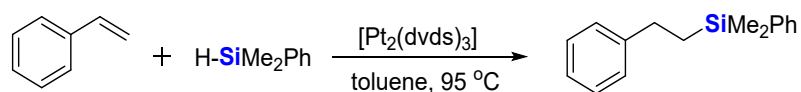

To a two-neck round-bottom flask equipped with a condenser and magnetic stirrer, styrene (100  $\mu\text{L}$ , 0.86 mmol) was placed in an argon atmosphere along with anhydrous toluene (3.0 mL), dimethylphenylsilane (142  $\mu\text{L}$ , 0.91 mmol) and  $[\text{Pt}_2(\text{dvds})_3]$  (9.852  $\mu\text{L}$ ,  $8.6 \times 10^{-7}$  mol). The reaction mixture was kept at  $95\text{ }^\circ\text{C}$  to obtain complete Si-H consumption that was verified *via* the real-time *in situ* FT-IR technique based on changes in the surface areas of bands at  $\bar{\nu} = 895\text{ cm}^{-1}$  and  $\bar{\nu} = 2130\text{ cm}^{-1}$  characteristic for stretching vibrations of Si-H bond (8 hours).

### 3. List of isolated compounds:

Table S1. The list of obtained compounds with structures and respective autogravitation.

| Structure                                                                           | Compound Abbrev.            | NMR spectra page: |
|-------------------------------------------------------------------------------------|-----------------------------|-------------------|
| 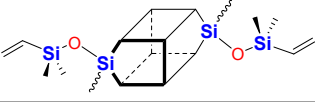   | <b>1c</b>                   | 8-9               |
|    | <b>3a-Vi</b><br><b>3b-H</b> | 10-11             |
|    | <b>3c-H</b>                 | 12-13             |
|    | <b>7b-d</b>                 | 14-15             |
|    | <b>7b-e</b>                 | 16-17             |
|  | <b>7b-f</b>                 | 18-19             |
|  | <b>6a-g</b>                 | 20-21             |
|  | <b>7b-h</b>                 | 22-23             |
|  | <b>7c-d</b>                 | 24-25             |
|  | <b>7c-e</b>                 | 26-27             |
|  | <b>7c-f</b>                 | 28-29             |
|  | <b>7c-g</b>                 | 30-31             |
|  | <b>7c-h</b>                 | 32-33             |

#### 4. Analytical data of obtained products incl. $^1\text{H}$ , $^{13}\text{C}$ , $^{29}\text{Si}$ NMR spectra

1c

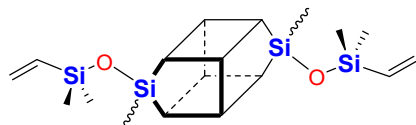

White solid. Isolated Yield 94%.

$^1\text{H}$  NMR (300 MHz,  $\text{CDCl}_3$ , ppm):  $\delta$  = 0.11 (s, 12H,  $\text{SiCH}_3$ ), 0.28 (s, 6H,  $\text{SiCH}_3$ ), 5.66 (dd,  $J_{\text{H-H}} = 20.1$ , 3.9 Hz, 2H), 5.75 (dd,  $J_{\text{H-H}} = 15.0$ , 3.9 Hz, 2H), 6.06 (dd,  $J_{\text{H-H}} = 20.1$ , 15.0 Hz, 2H), 7.17-7.59 (m, 40H, Ph).

$^{13}\text{C}$  NMR (101 MHz,  $\text{CDCl}_3$ , ppm):  $\delta$  = -2.67 ( $\text{Si}(\text{CH}_3)_2$ ), 0.19 ( $\text{SiCH}_3$ ), 127.70-127.86 (Ph), 130.43-130.47 (Ph), 131.15 ( $\text{H}_2\text{C}=\text{CH}-$ ), 132.05-132.23 (Ph), 134.16-134.31 (Ph), 138.67 ( $\text{H}_2\text{C}=\text{CH}-$ ).

$^{29}\text{Si}$  NMR (79.5 MHz,  $\text{CDCl}_3$ , ppm):  $\delta$  = -1.81 ( $\text{Si}(\text{CH}_3)_2\text{Vi}$ ), -64.10 ( $\text{Si}(\text{CH}_3)$ ), -79.29, -79.36, -79.54, -79.74 (-Si-Ph).

IR (ATR,  $\text{cm}^{-1}$ ): 3072.99, 3050.41 (C-H phenyl), 2962.61 (C-H), 1594.32, 1430.09 (C=C phenyl), 1258.67 (Si-C), 1092.13, 1025.54 (Si-O-Si), 997.20 (C-H phenyl).

EA: Anal. calcd for  $\text{C}_{58}\text{H}_{64}\text{O}_{16}\text{Si}_{12}$  (%): C, 51.44, H, 4.76; found: C, 51.45, H, 4.77.

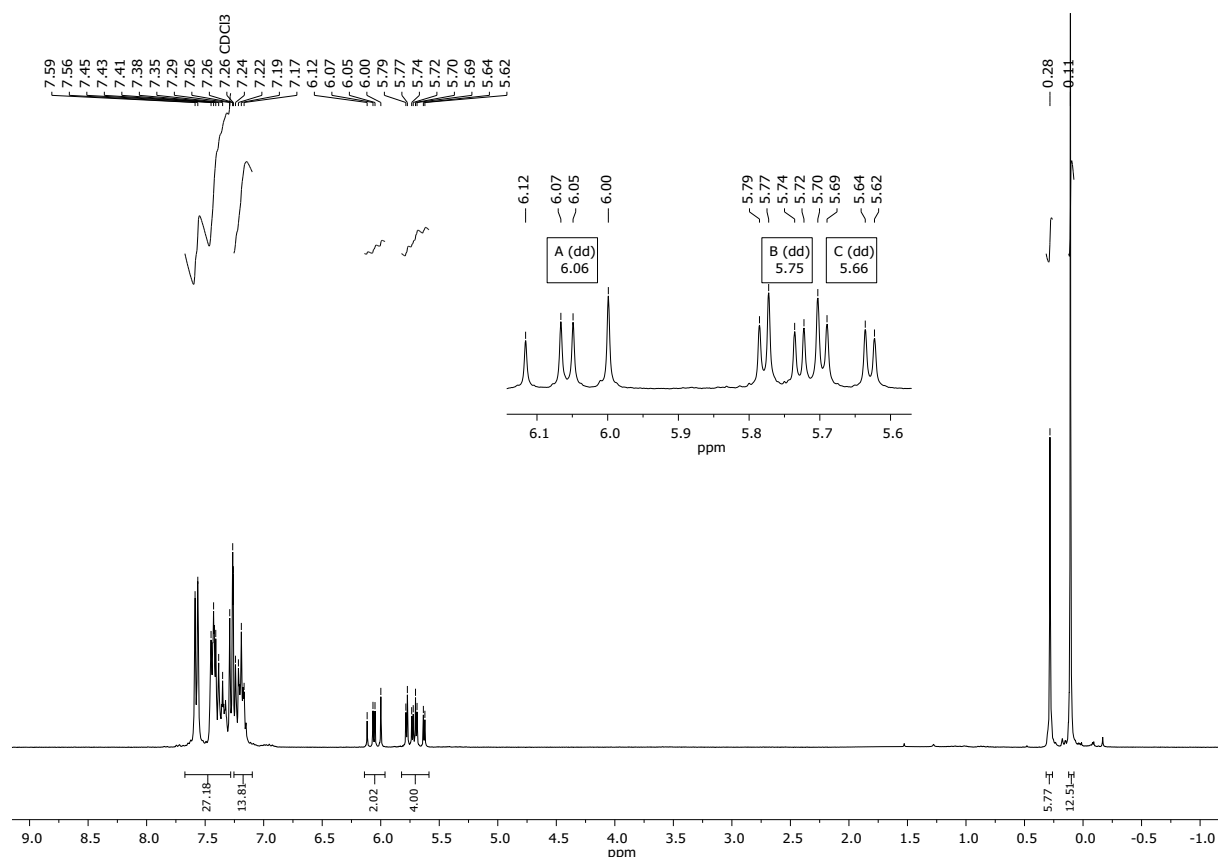

Figure S1  $^1\text{H}$  NMR (300 MHz,  $\text{CDCl}_3$ ) spectrum of 1c.



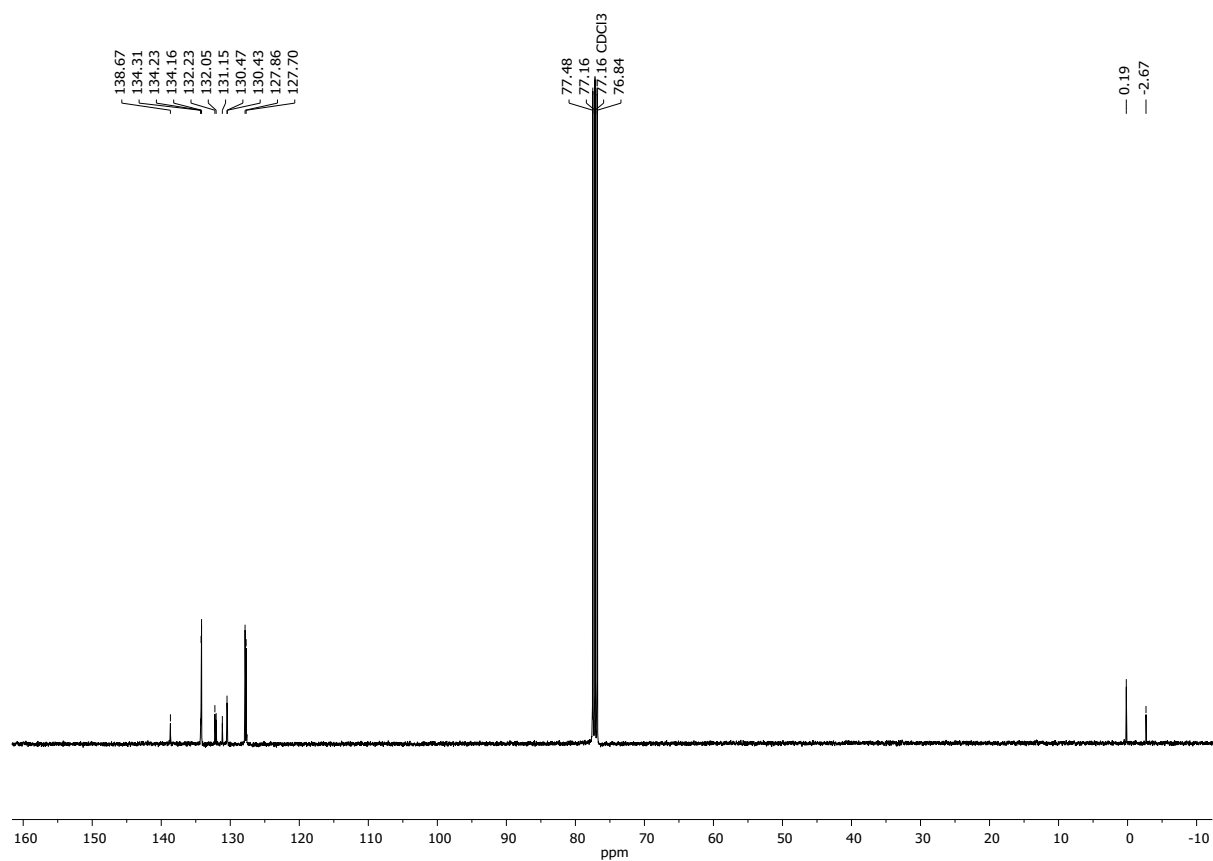

Figure S2 <sup>13</sup>C NMR (101 MHz, CDCl<sub>3</sub>) spectrum of **1c**.

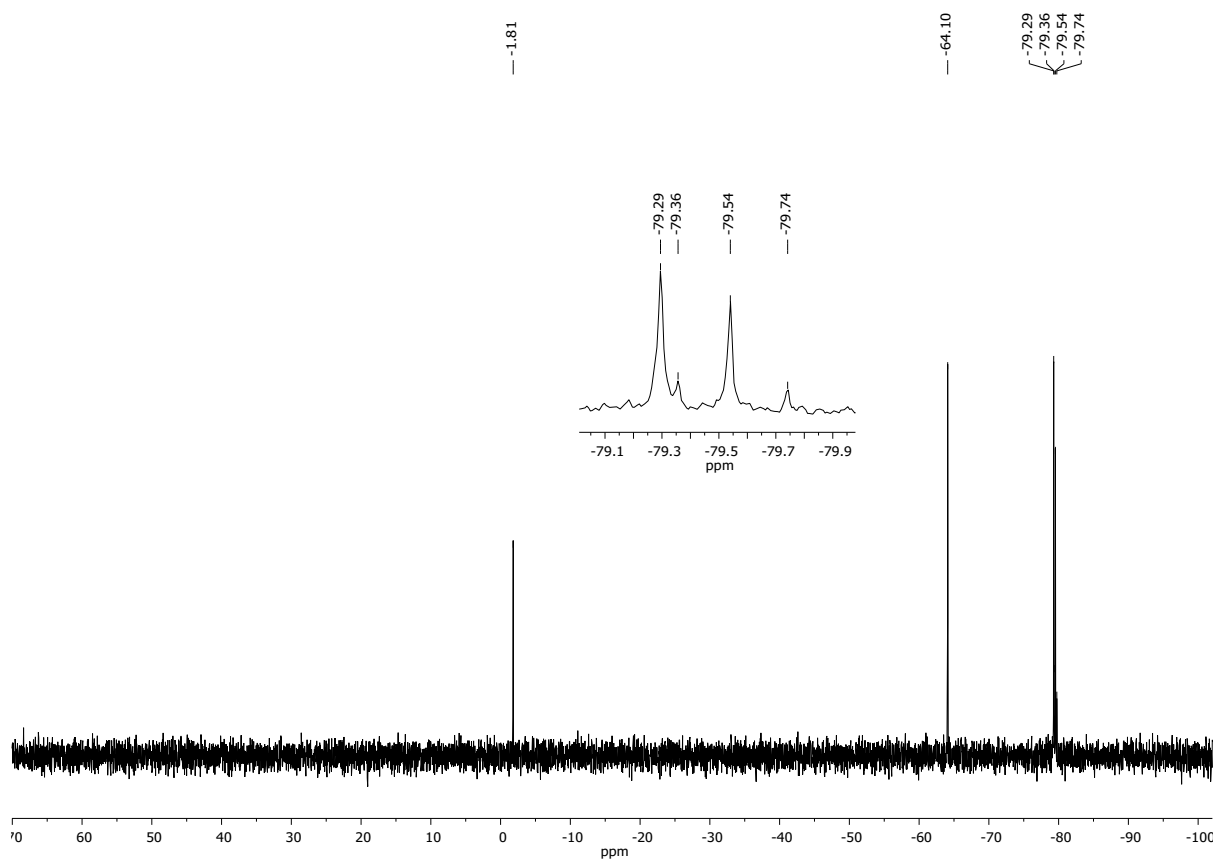

Figure S3 <sup>29</sup>Si NMR (79.5 MHz, CDCl<sub>3</sub>) spectrum of **1c**.

### 3a-Vi / 3b-H

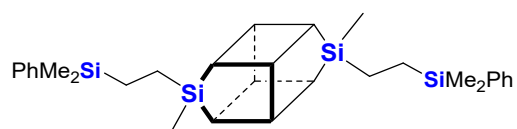

White solid. Isolated Yield 94% for **3b-H** and 92% for **3a-Vi**.

<sup>1</sup>H NMR (300 MHz, CDCl<sub>3</sub>, ppm): δ = 0.12 (s, 12H, SiCH<sub>3</sub>), 0.28 (s, 6H, SiCH<sub>3</sub>), 0.59-0.68 (m, 4H, -Si-CH<sub>2</sub>-), 0.75-0.81 (m, 4H, -Si-CH<sub>2</sub>-), 7.15-7.47 (m, 40H, Ph), 7.55 (d, *J*<sub>H-H</sub> = 7.3 Hz, 10H).

<sup>13</sup>C NMR (101 MHz, CDCl<sub>3</sub>, ppm): δ = -3.58 (Si(CH<sub>3</sub>)<sub>2</sub>), -1.40 (SiCH<sub>3</sub>), 6.52 (Si-CH<sub>2</sub>-), 9.03 (Si-CH<sub>2</sub>), 127.77-127.90 (Ph), 128.80 (Ph), 130.43 (Ph), 131.23 (Ph), 132.26 (Ph), 133.70 (Ph), 134.07 (Ph), 134.19 (Ph), 139.26 (Ph).

<sup>29</sup>Si NMR (79.5 MHz, CDCl<sub>3</sub>, ppm): δ = -1.22 (Si(CH<sub>3</sub>)<sub>2</sub>), -17.39 (Si(CH<sub>3</sub>)), -78.69, -79.65 (-Si-Ph).

IR (ATR, cm<sup>-1</sup>): 3071.16, 3007.30 (C-H phenyl), 2954.96, 2912.39 (C-H), 1593.93, 1429.29 (C=C phenyl), 1258.15 (Si-C), 1077.25, 1028.51 (Si-O-Si), 997.91 (C-H phenyl).

EA: Anal. calcd for C<sub>70</sub>H<sub>76</sub>O<sub>14</sub>Si<sub>12</sub> (%): C, 56.87, H, 5.18; found: C, 56.89, H, 5.19.

The analytical data of **3a-Vi** and **3b-H** are consistent.

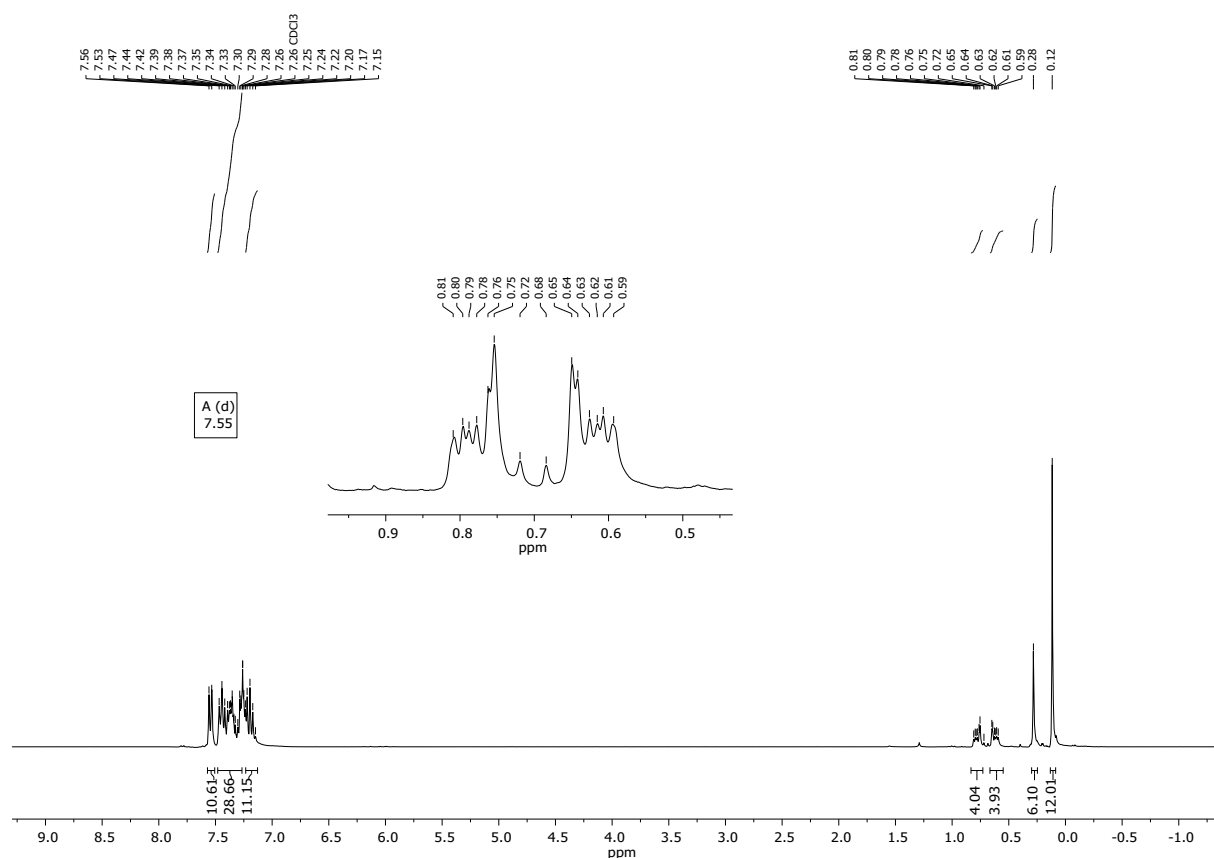

Figure S4 <sup>1</sup>H NMR (300 MHz, CDCl<sub>3</sub>) spectrum of **3a-Vi** / **3b-H**.

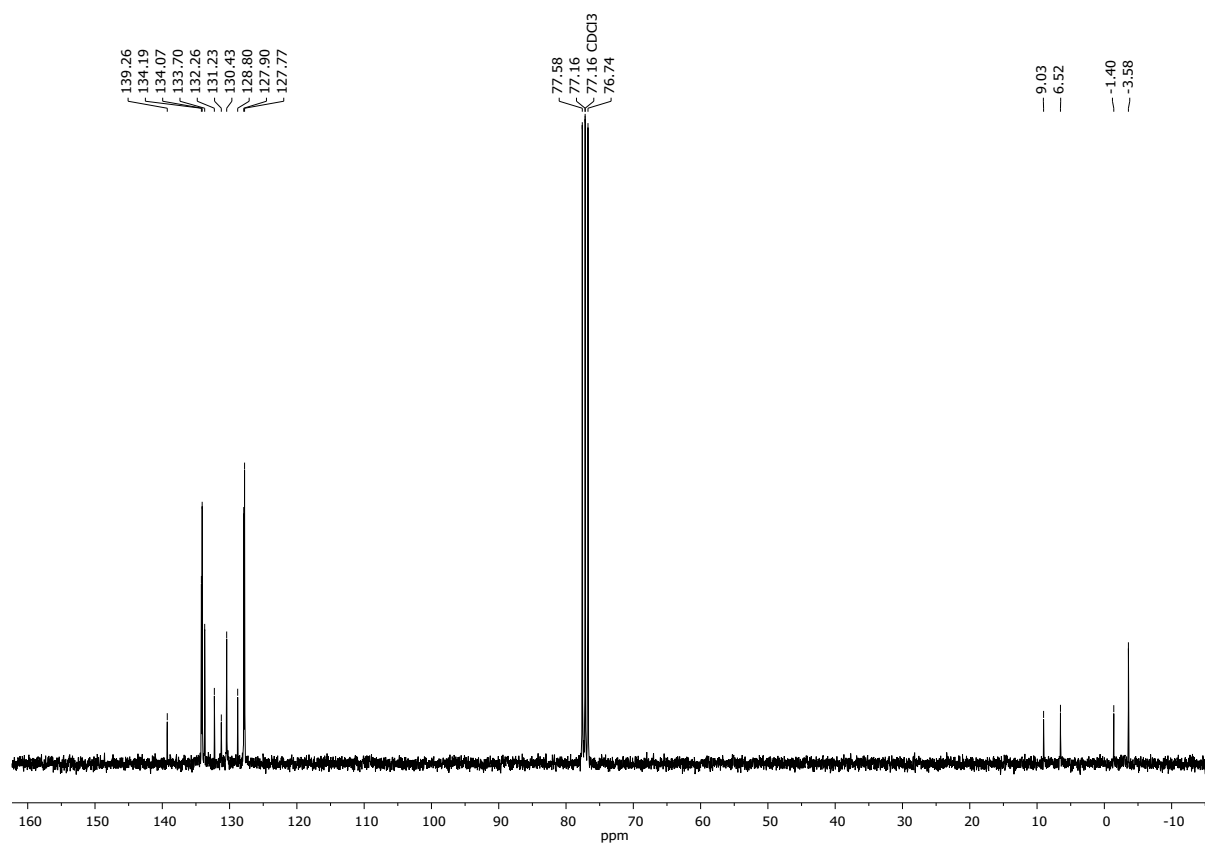

Figure S5  $^{13}\text{C}$  NMR (101 MHz,  $\text{CDCl}_3$ ) spectrum of **3a-Vi** / **3b-H**.

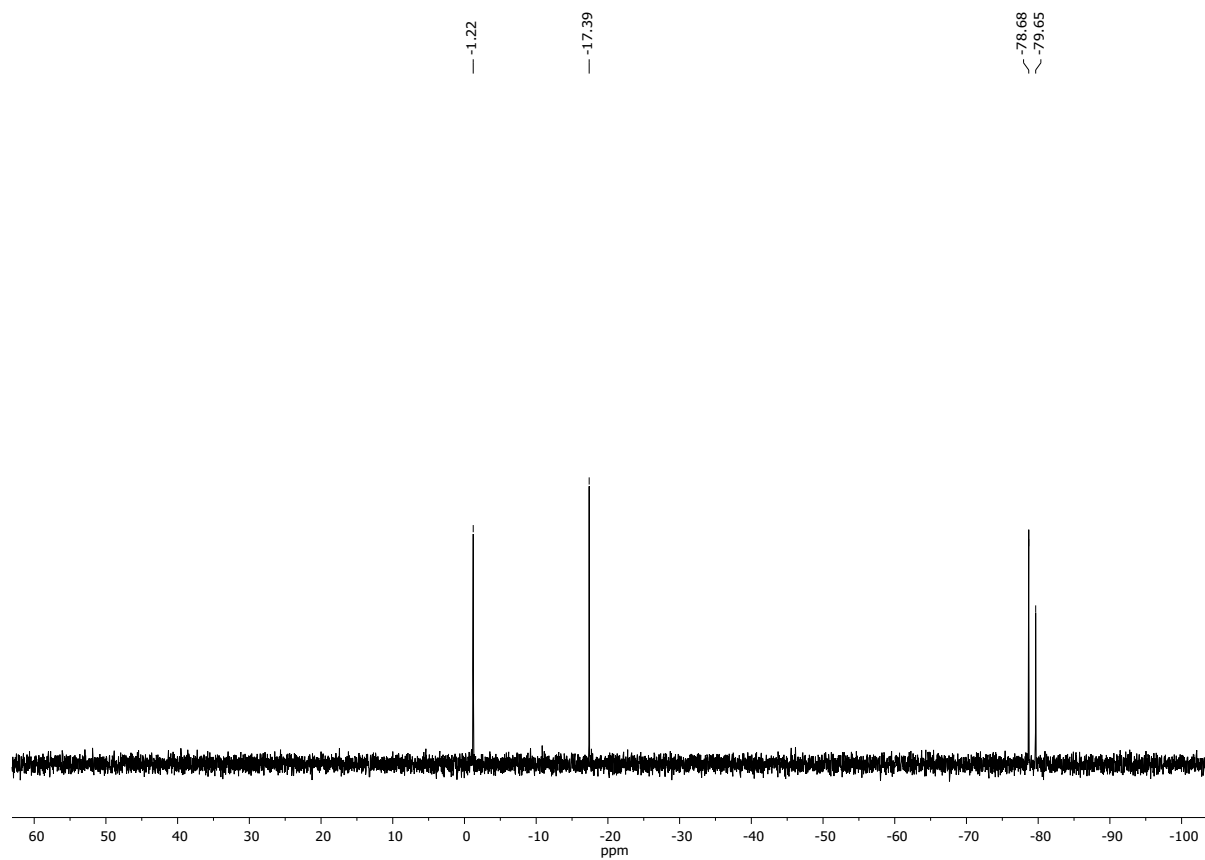

Figure S6  $^{29}\text{Si}$  NMR (79.5 MHz,  $\text{CDCl}_3$ ) spectrum of **3a-Vi** / **3b-H**.

### 3c-H

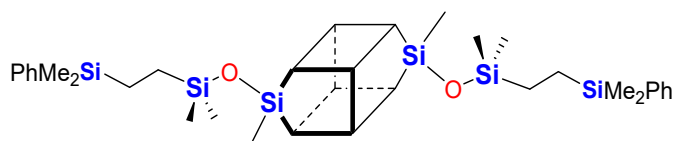

White solid. Isolated Yield 96%.

<sup>1</sup>H NMR (300 MHz, CDCl<sub>3</sub>, ppm): δ = 0.08 (s, 12H, Si(CH<sub>3</sub>)<sub>2</sub>), 0.11 (s, 12H, Si(CH<sub>3</sub>)<sub>2</sub>), 0.25 (s, 6H, SiCH<sub>3</sub>), 0.37-0.43 (m, 4H, -Si-CH<sub>2</sub>-), 0.55-0.61 (m, 4H, -Si-CH<sub>2</sub>-), 7.16-7.43 (m, 40H, Ph), 7.55 (d, *J*<sub>H-H</sub> = 7.3 Hz, 10H).

<sup>13</sup>C NMR (101 MHz, CDCl<sub>3</sub>, ppm): δ = -3.57 (Si(CH<sub>3</sub>)<sub>2</sub>), -2.59 (Si(CH<sub>3</sub>)<sub>2</sub>), -0.57 (SiCH<sub>3</sub>), 6.96 (Si-CH<sub>2</sub>-), 10.05 (Si-CH<sub>2</sub>-), 127.72-128.80 (Ph), 130.42-130.47 (Ph), 131.17 (Ph), 132.08 (Ph), 132.72 (Ph), 134.12-134.36 (Ph), 139.58 (Ph).

<sup>29</sup>Si NMR (79.5 MHz, CDCl<sub>3</sub>, ppm): δ = 10.66 (Si(CH<sub>3</sub>)<sub>2</sub>), -1.40 (Si(CH<sub>3</sub>)<sub>2</sub>), -64.25 (Si(CH<sub>3</sub>)), -79.29, -79.58 (-Si-Ph).

IR (ATR, cm<sup>-1</sup>): 3072.39, 3052.94, 3019.08 (C-H phenyl), 2957.45, 2905.83 (C-H), 1594.04, 1429.68 (C=C phenyl), 1257.76 (Si-C), 1097.76, 1057.46 (Si-O-Si), 997.60 (C-H phenyl).

EA: Anal. calcd for C<sub>74</sub>H<sub>88</sub>O<sub>16</sub>Si<sub>12</sub> (%): C, 54.64, H, 5.45; found: C, 54.72, H, 5.53.

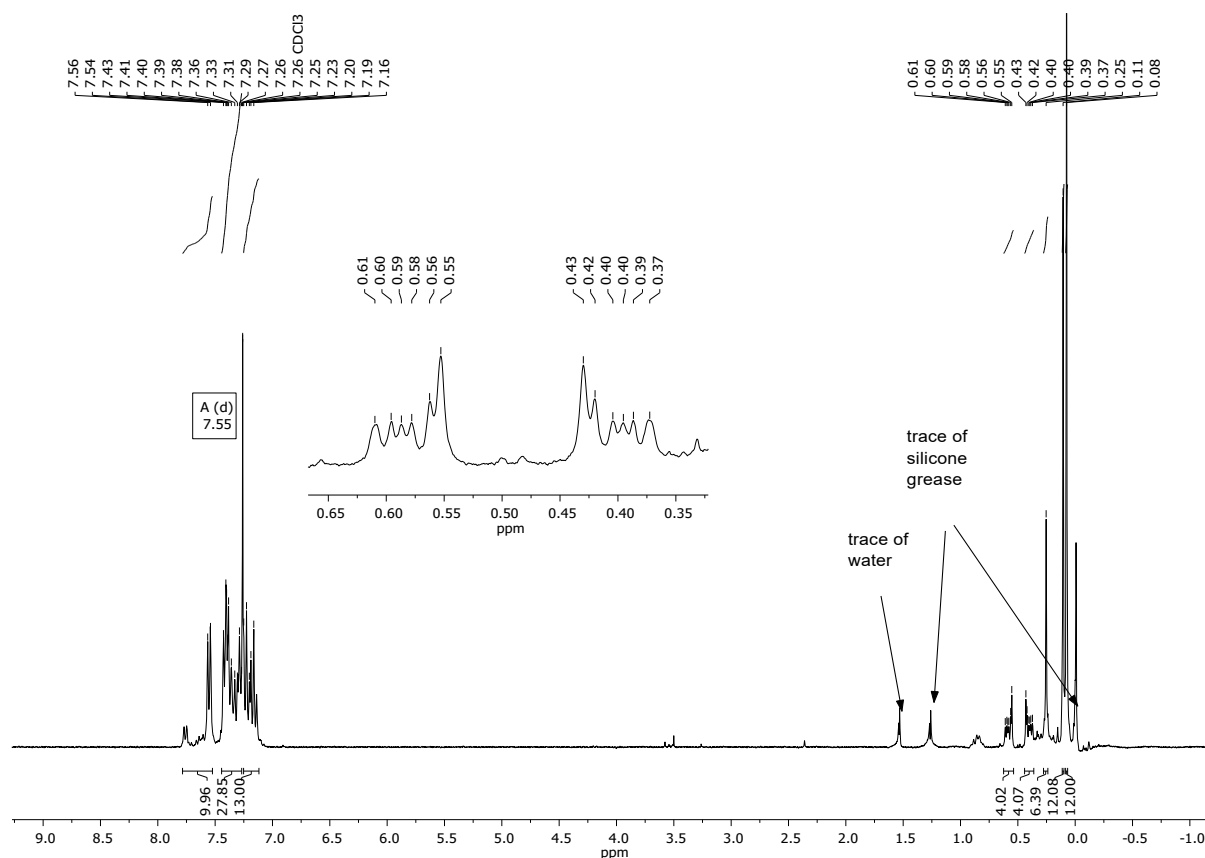

Figure S7 <sup>1</sup>H NMR (300 MHz, CDCl<sub>3</sub>) spectrum of 3c-H.

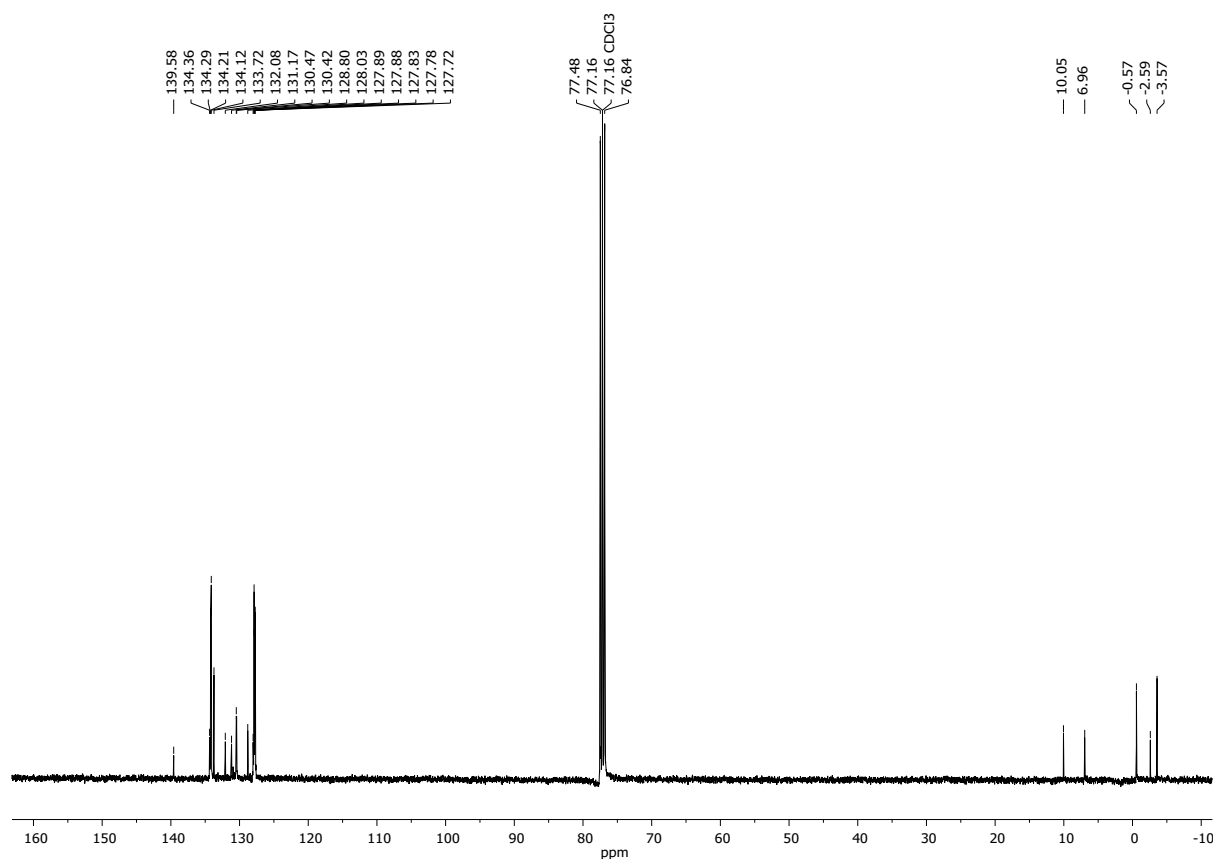

Figure S8 <sup>13</sup>C NMR (101 MHz, CDCl<sub>3</sub>) spectrum of **3c-H**.

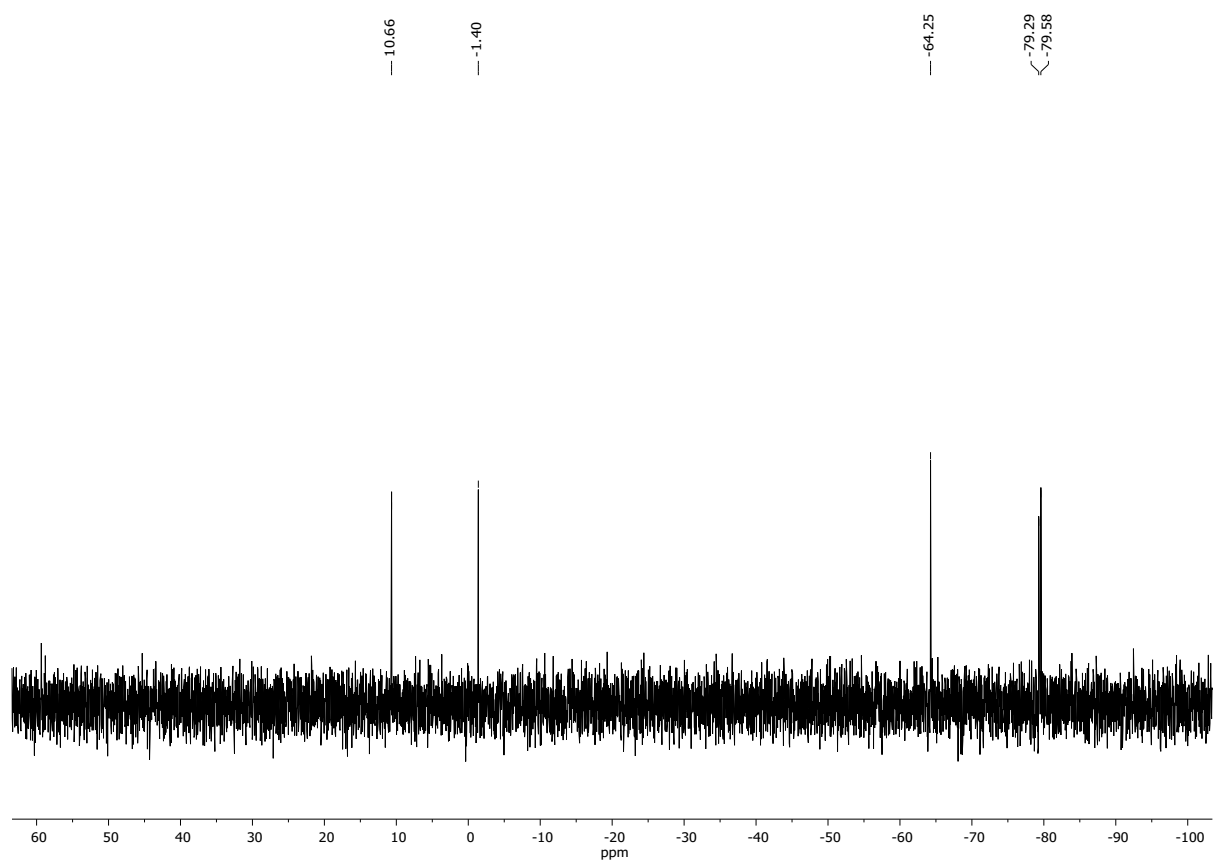

Figure S9 <sup>29</sup>Si NMR (79.5 MHz, CDCl<sub>3</sub>) spectrum of **3c-H**.

## 7b-d

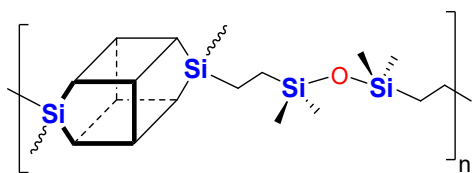

White viscous solid.

**<sup>1</sup>H NMR** (300 MHz, CDCl<sub>3</sub>, ppm): δ = -0.19 (s, SiCH<sub>3</sub>), -0.13 (s, SiCH<sub>3</sub>), -0.10 (s, SiCH<sub>3</sub>), 0.25-0.28 (d, *J*<sub>H-H</sub> = 6.5, -Si-CH<sub>2</sub>-), 0.38-0.56 (m, -Si-CH<sub>2</sub>-), 5.90-6.23 (m, terminal bond), 7.15-7.54 (m, Ph).

**<sup>13</sup>C NMR** (101 MHz, CD<sub>2</sub>Cl<sub>2</sub>, ppm): δ = -1.44 (SiCH<sub>3</sub>), -0.21 (SiCH<sub>3</sub>), 1.37 (SiCH<sub>3</sub>), 8.76 (-Si-CH<sub>2</sub>-), 9.59 (-Si-CH<sub>2</sub>-), 128.24-128.41 (Ph), 131.00-13.45 (Ph), 132.59 (Ph), 134.46-134.62 (Ph).

**<sup>29</sup>Si NMR** (79.5 MHz, CDCl<sub>3</sub>, ppm): δ = 8.28, (Si(CH<sub>3</sub>)), -16.77 (Si(CH<sub>3</sub>)), -78.62, -79.66 (-Si-Ph).

**IR** (ATR, cm<sup>-1</sup>): 3072.62, 3051.14 (C-H phenyl), 2956.29, 2912.16 (C-H), 1594.06, 1430.06 (C=C phenyl), 1256.11 (Si-C), 1077.17 (Si-O-Si), 997.82 (C-H phenyl).

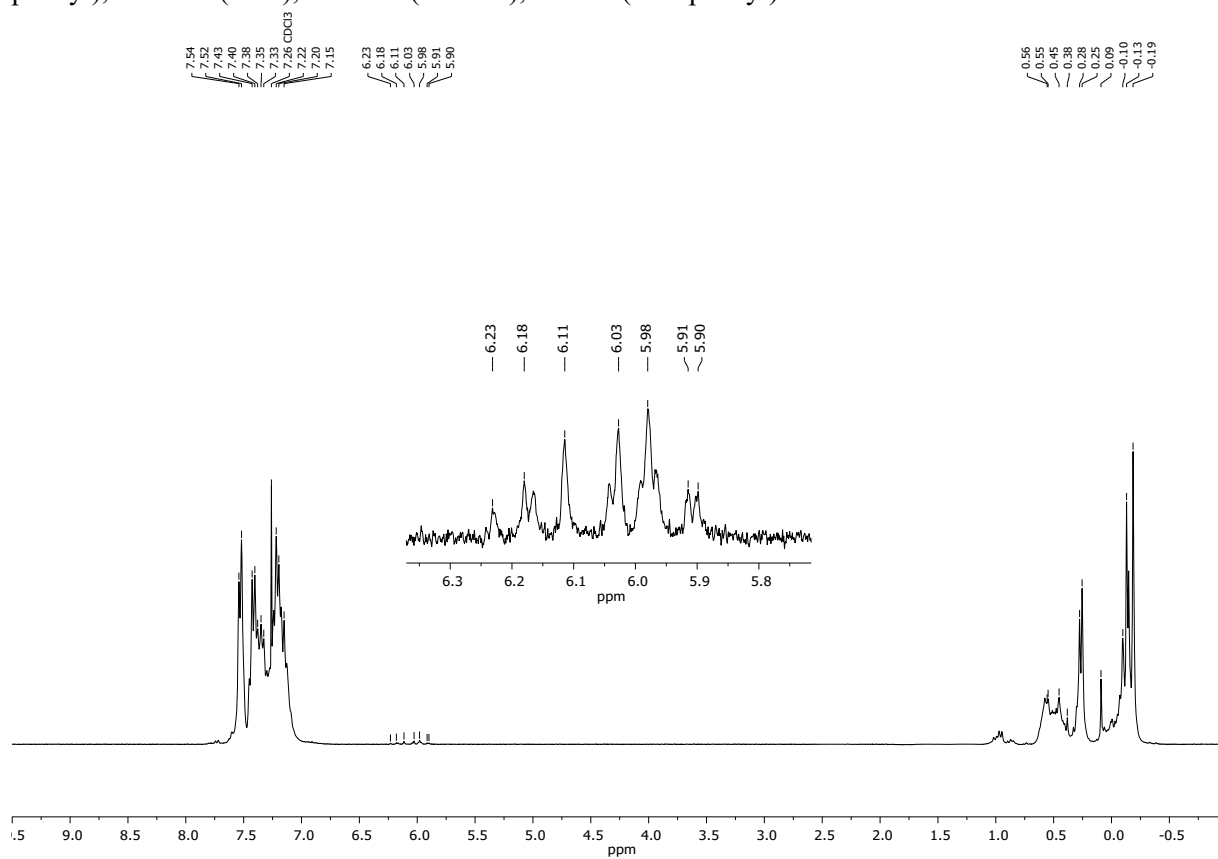

**Figure S10** <sup>1</sup>H NMR (300 MHz, CDCl<sub>3</sub>) spectrum of **7b-d**.

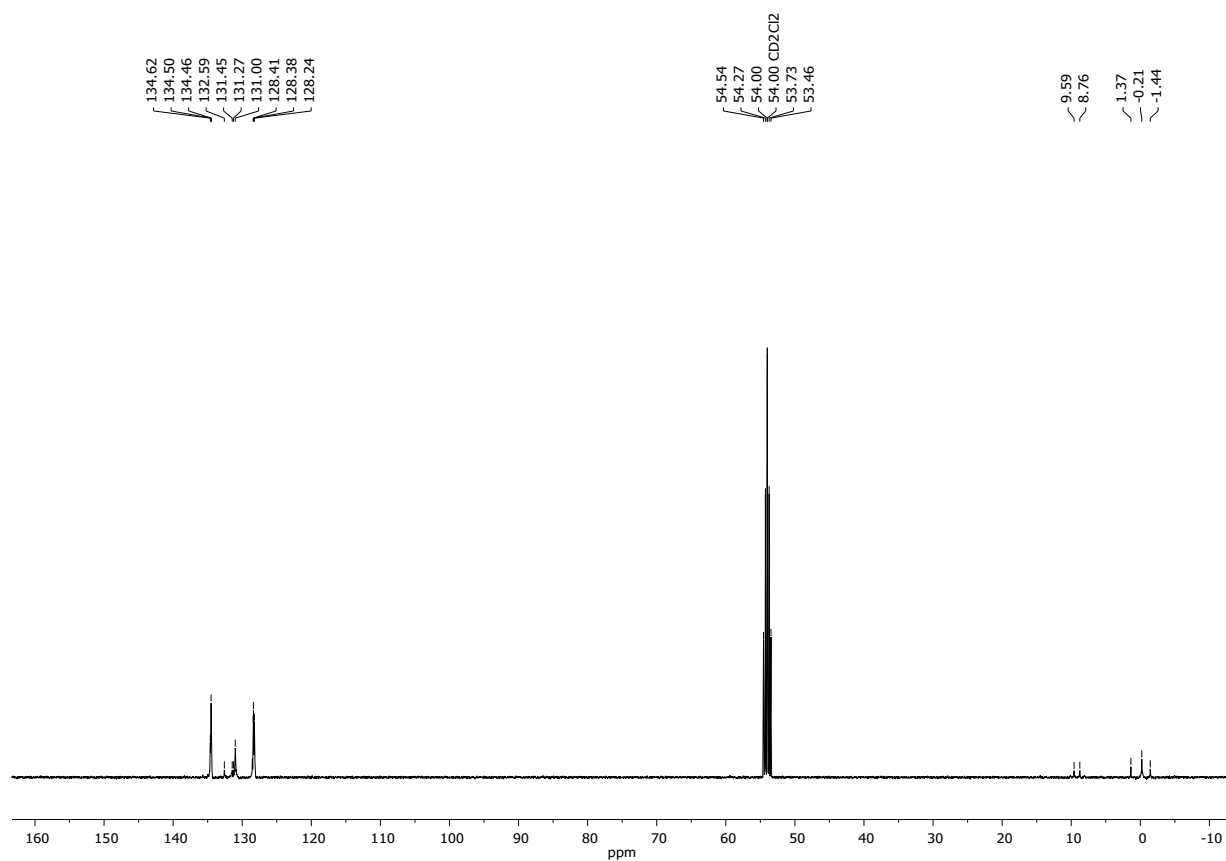

**Figure S11**  $^{13}\text{C}$  NMR (101 MHz,  $\text{CD}_2\text{Cl}_2$ ) spectrum of **7b-d**.

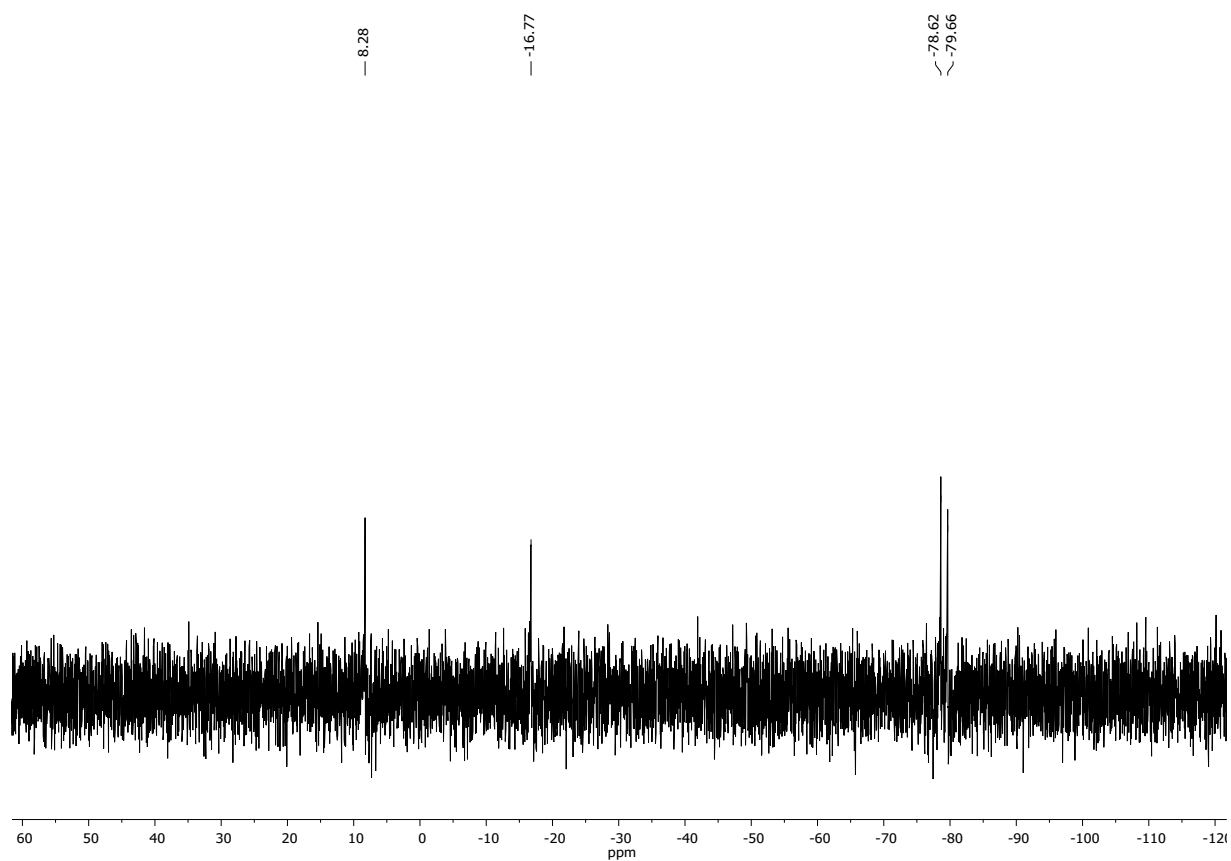

**Figure S12**  $^{29}\text{Si}$  NMR (79.5 MHz,  $\text{CDCl}_3$ ) spectrum of **7b-d**.



### 7b-e

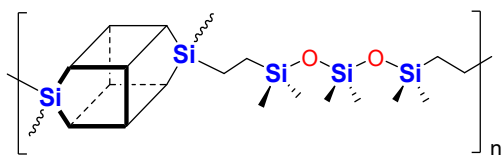

White viscous solid.

**<sup>1</sup>H NMR** (300 MHz, CDCl<sub>3</sub>, ppm): δ = -0.16 (s, SiCH<sub>3</sub>), -0.14 (s, SiCH<sub>3</sub>), 0.26 (s, SiCH<sub>3</sub>), 0.45-0.50 (m, -Si-CH<sub>2</sub>-), 0.55-0.61 (m, -Si-CH<sub>2</sub>-), 7.12-7.53 (m, Ph).

**<sup>13</sup>C NMR** (101 MHz, CDCl<sub>3</sub>, ppm): δ = -1.58 (SiCH<sub>3</sub>), -0.54 (SiCH<sub>3</sub>), 1.35 (SiCH<sub>3</sub>), 8.28 (-Si-CH<sub>2</sub>-), 9.03 (-Si-CH<sub>2</sub>-), 127.73-127.86 (Ph), 130.40 (Ph), 131.21-132.27 (Ph), 134.05-134.15 (Ph).

**<sup>29</sup>Si NMR** (79.5 MHz, CDCl<sub>3</sub>, ppm): δ = 8.05 (Si(CH<sub>3</sub>)), -17.07 (Si(CH<sub>3</sub>)), -21.13 (Si(CH<sub>3</sub>)), -78.70, -79.68 (-Si-Ph).

**IR** (ATR, cm<sup>-1</sup>): 3072.49, 3051.11, 3027.39 (C-H phenyl), 2957.11, 2914.51 (C-H), 1593.87, 1429.97 (C=C phenyl), 1257.17 (Si-C), 1076.96 (Si-O-Si), 997.51 (C-H phenyl).

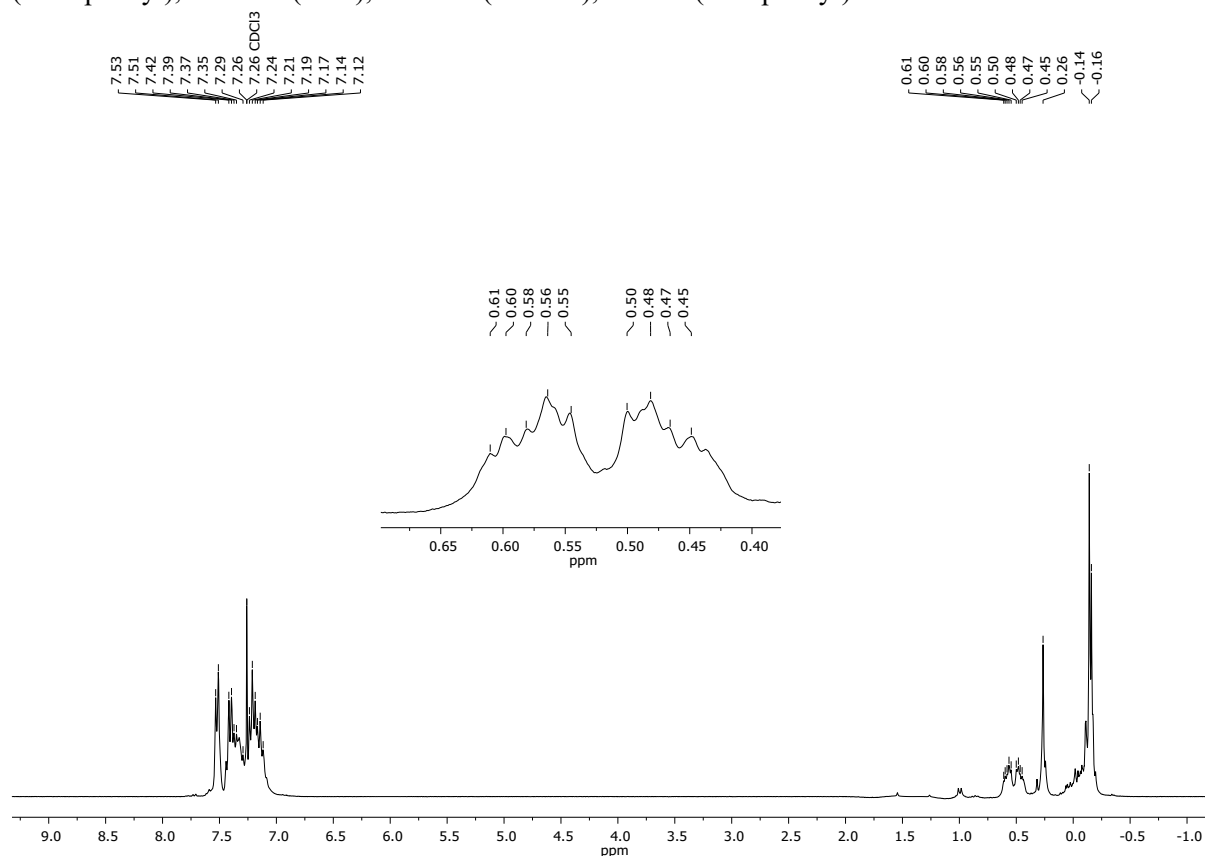

Figure S13 <sup>1</sup>H NMR (300 MHz, CDCl<sub>3</sub>) spectrum of 7b-e.

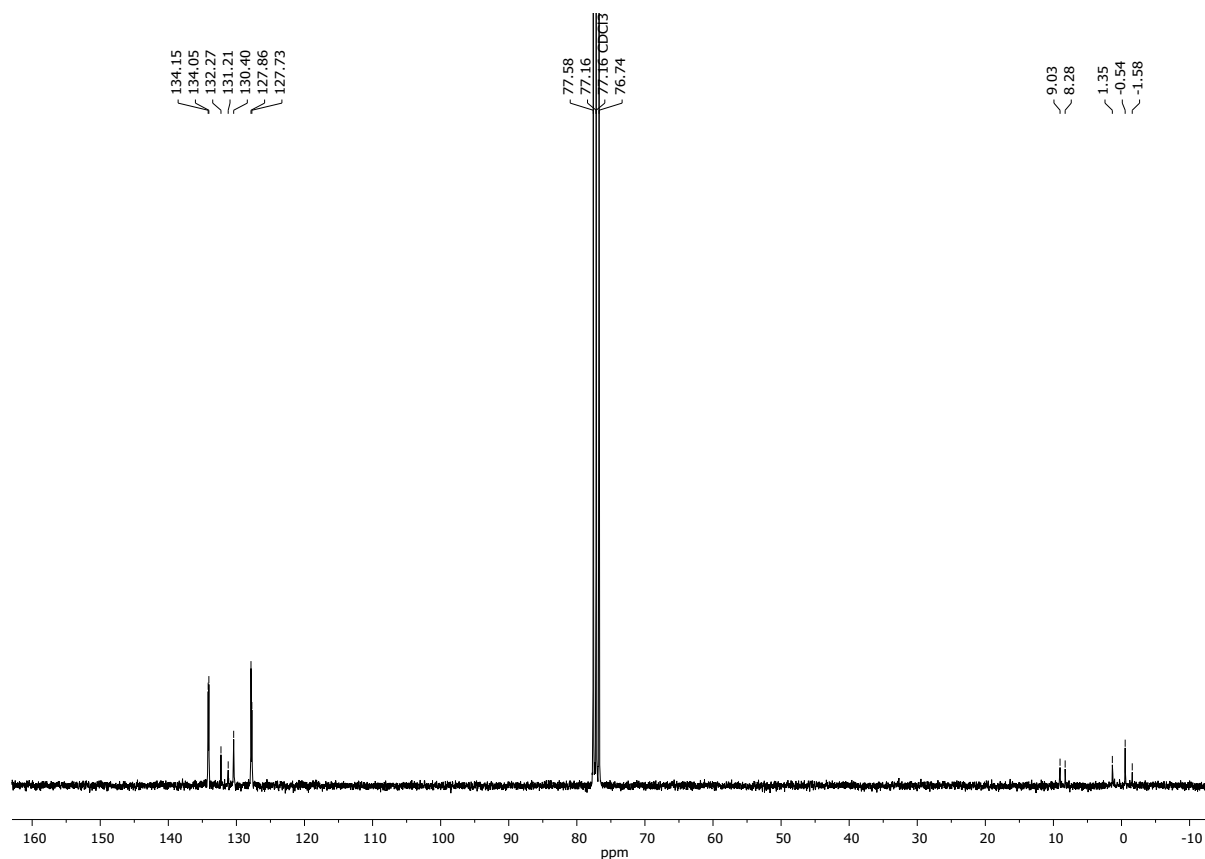

Figure S14  $^{13}\text{C}$  NMR (101 MHz,  $\text{CDCl}_3$ ) spectrum of **7b-e**.

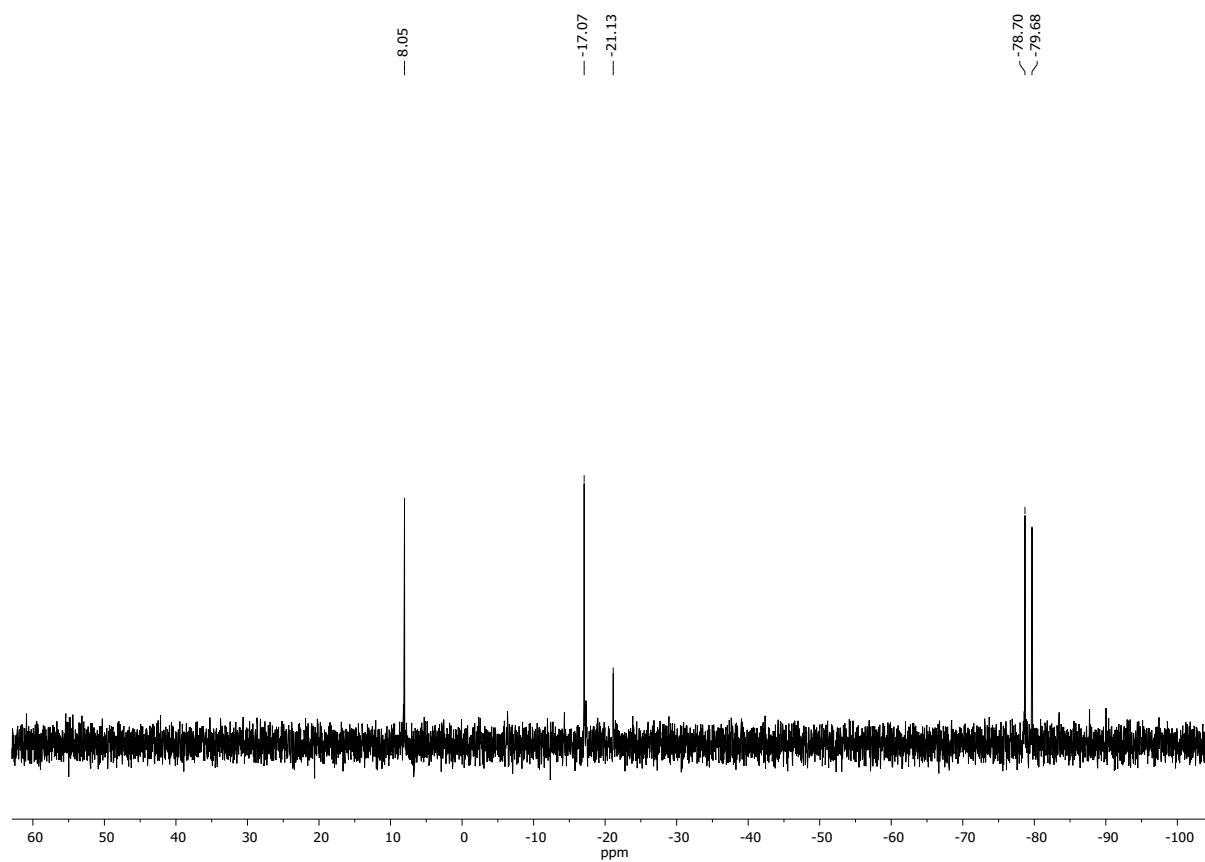

Figure S15  $^{29}\text{Si}$  NMR (79.5 MHz,  $\text{CDCl}_3$ ) spectrum of **7b-e**

**7b-f**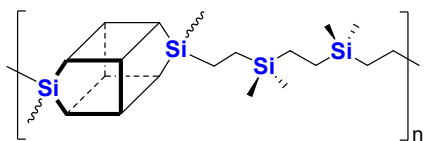

White viscous solid.

**<sup>1</sup>H NMR** (300 MHz, CD<sub>2</sub>Cl<sub>2</sub>, ppm): δ = -0.24 (s, SiCH<sub>3</sub>), -0.08- -0.06 (d, -Si-CH<sub>2</sub>-CH<sub>2</sub>-), 0.30 (s, SiCH<sub>3</sub>), 0.41 (s, SiCH<sub>3</sub>), 0.55-0.62 (m, -Si-CH<sub>2</sub>-), 5.93-5.95 (m, terminal bond), 6.04 (dd, *J*<sub>H-H</sub> = 14.9, 4.3 Hz terminal bond), 6.21 (dd, *J*<sub>H-H</sub> = 19.6, 15.1 Hz, terminal bond), 7.16-7.56 (m, Ph).

**<sup>13</sup>C NMR** (101 MHz, CD<sub>2</sub>Cl<sub>2</sub>, ppm): δ = -4.92 (SiCH<sub>3</sub>), -1.94 (SiCH<sub>3</sub>), -1.45 (SiCH<sub>3</sub>), 5.51 (-Si-CH<sub>2</sub>-), 6.40 (-Si-CH<sub>2</sub>-), 8.82 (-Si-CH<sub>2</sub>-), 9.63 (-Si-CH<sub>2</sub>-), 127.70-127.87 (Ph), 130.45-13.53 (Ph), 132.07 (Ph), 133.79-134.45 (Ph), 135.16 (Ph).

**<sup>29</sup>Si NMR** (79.5 MHz, CDCl<sub>3</sub>, ppm): δ = 16.14 (Si(CH<sub>3</sub>)), 5.91 (Si(CH<sub>3</sub>)), -17.12 (Si(CH<sub>3</sub>)), -78.68, -79.67 (-Si-Ph).

**IR** (ATR, cm<sup>-1</sup>): 3073.47, 3050.70 (C-H phenyl), 2954.07, 2900.05 (C-H), 1594.00, 1430.02 (C=C phenyl), 1259.21 (Si-C), 1074.39, 1028.42 (Si-O-Si), 997.49 (C-H phenyl).

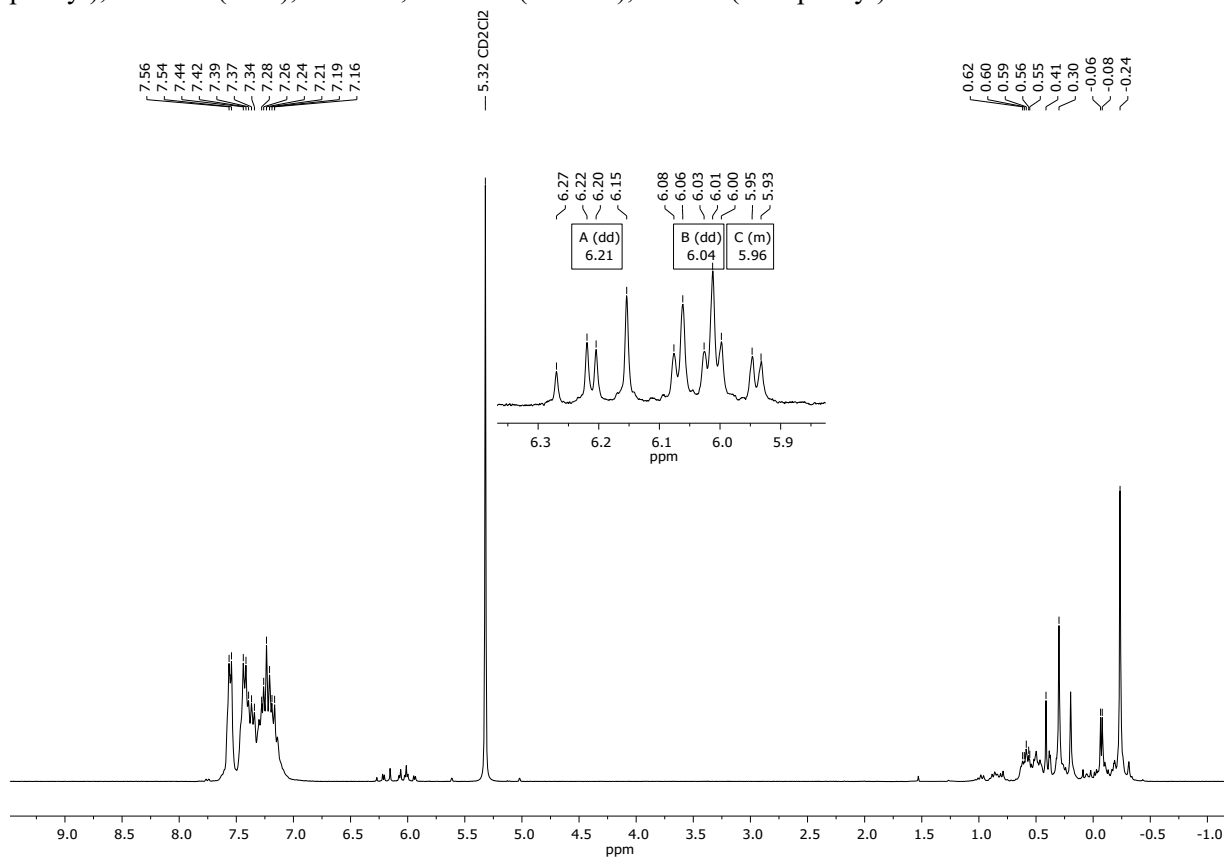

**Figure S16** <sup>1</sup>H NMR (300 MHz, CD<sub>2</sub>Cl<sub>2</sub>) spectrum of **7b-f**.

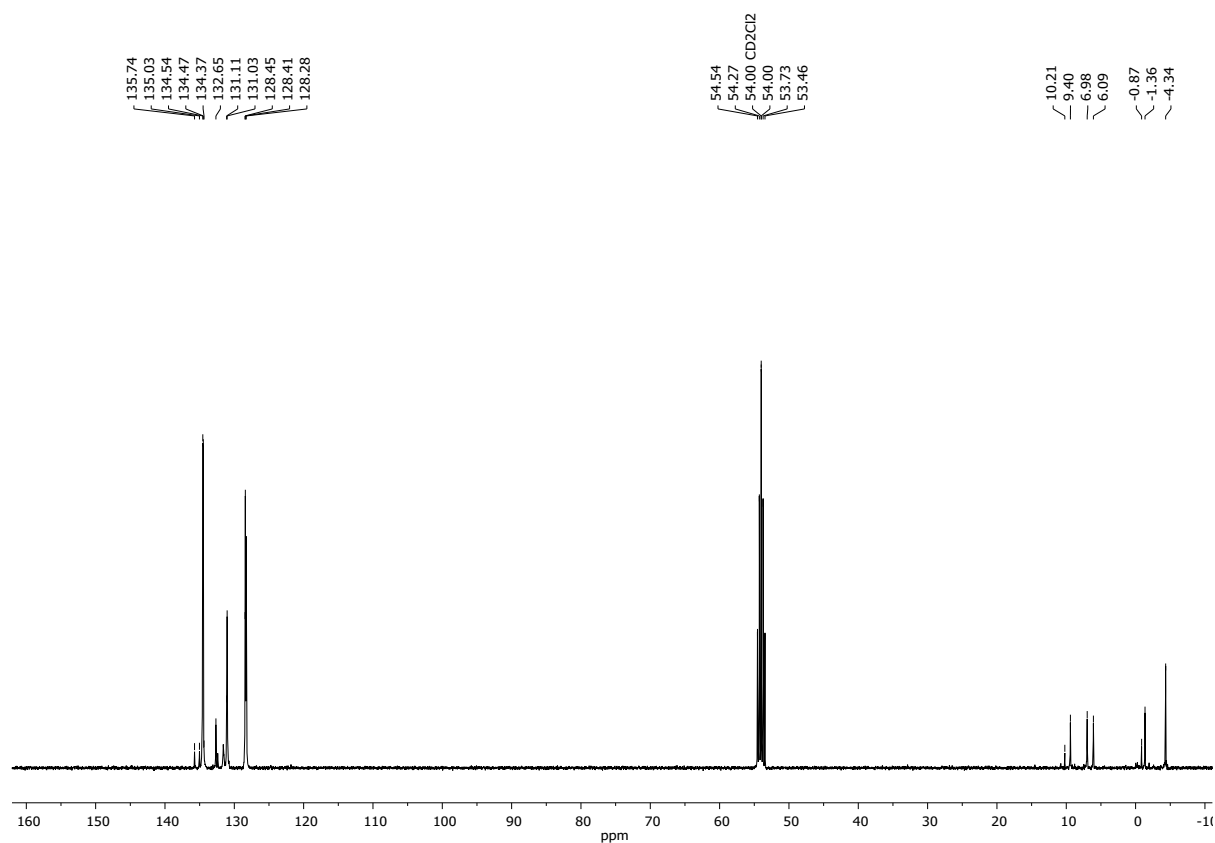

Figure S17 <sup>13</sup>C NMR (101 MHz, CD<sub>2</sub>Cl<sub>2</sub>) spectrum of **7b-f**.

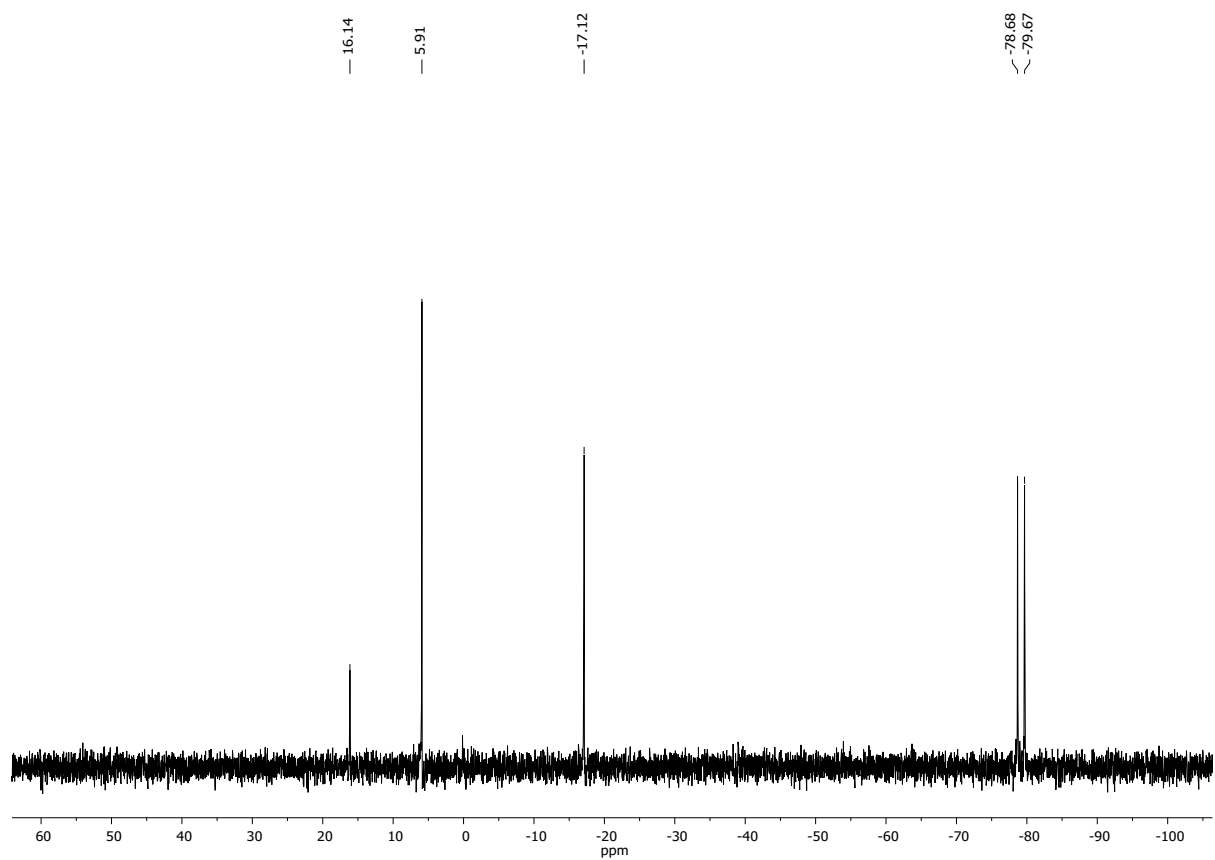

Figure S18 <sup>29</sup>Si NMR (79.5 MHz, CDCl<sub>3</sub>) spectrum of **7b-f**.

**6a-g**

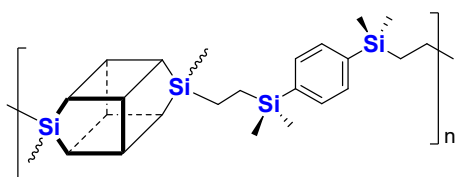

White viscous solid.

**<sup>1</sup>H NMR** (300 MHz, CDCl<sub>3</sub>, ppm): δ = 0.11 (s, Si(CH<sub>3</sub>)<sub>2</sub>), 0.30 (s, SiCH<sub>3</sub>), 0.37 (s, SiCH<sub>3</sub>), 0.64-0.70 (m, -Si-CH<sub>2</sub>-), 0.74-0.80 (m, -Si-CH<sub>2</sub>-), 5.75-6.37 (m, terminal bonds), 7.17-7.46 (m, Ph), 7.51 (d, *J*<sub>H-H</sub> = 6.7 Hz).

**<sup>13</sup>C NMR** (101 MHz, CDCl<sub>3</sub>, ppm): δ = -3.58 (Si(CH<sub>3</sub>)<sub>2</sub>), -1.39 (SiCH<sub>3</sub>), 6.44 (-Si-CH<sub>2</sub>-), 9.08 (-Si-CH<sub>2</sub>-), 127.77-127.89 (Ph), 130.42 (Ph), 131.21 (Ph), 132.26 (Ph), 132.93 (Ph), 134.07-134.18 (Ph), 139.66 (Ph).

**<sup>29</sup>Si NMR** (79.5 MHz, CDCl<sub>3</sub>, ppm): δ = -1.42, -1.48 (Si(CH<sub>3</sub>)<sub>2</sub>), -17.37 (Si(CH<sub>3</sub>)), -78.64, -79.64 (-Si-Ph).

**IR** (ATR, cm<sup>-1</sup>): 3072.25, 3026.24 (C-H phenyl), 2954.45, 2916.67 (C-H), 1594.19, 1494.91, 1430.17 (C=C phenyl), 1378.65 (C-H), 1259.11 (Si-C), 1129.00, 1091.14, 1029.30 (Si-O-Si), 998.36 (C-H phenyl).

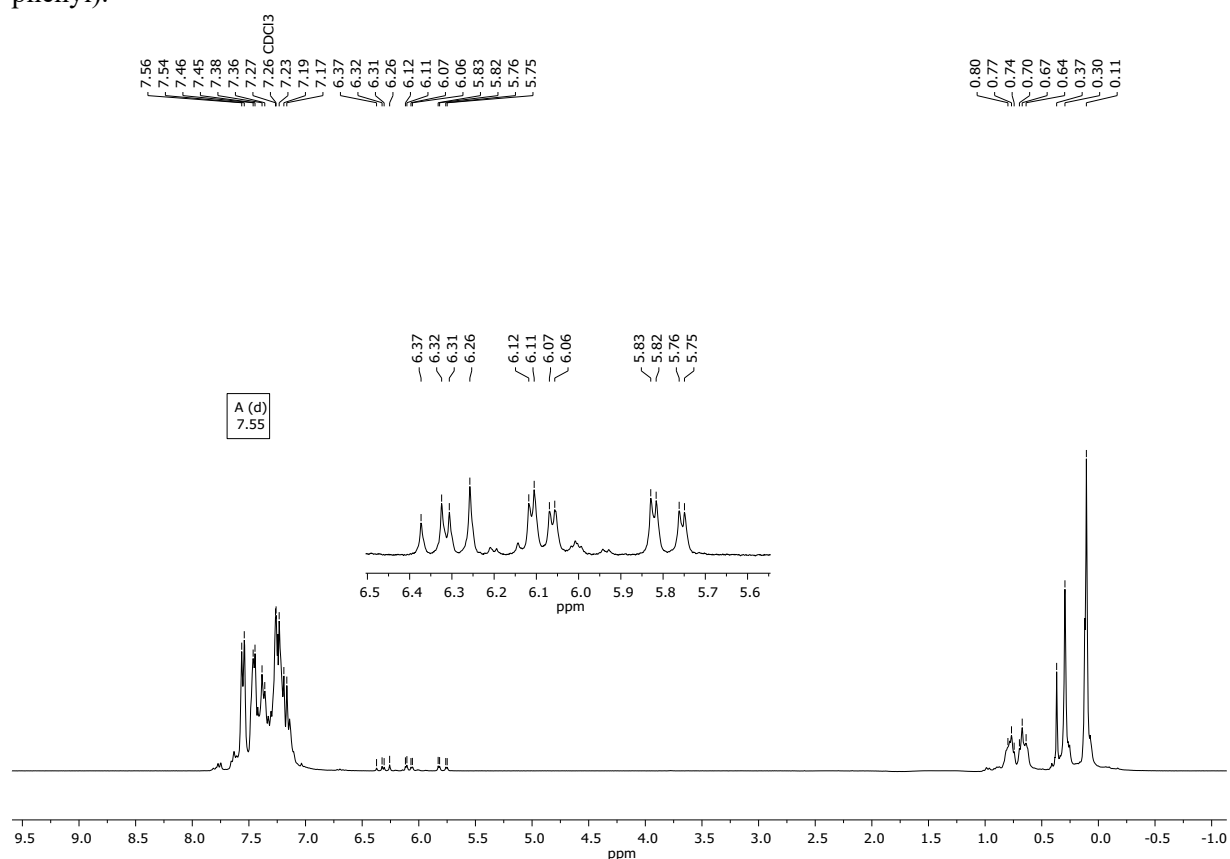

**Figure S19** <sup>1</sup>H NMR (300 MHz, CDCl<sub>3</sub>) spectrum of **6a-g**.

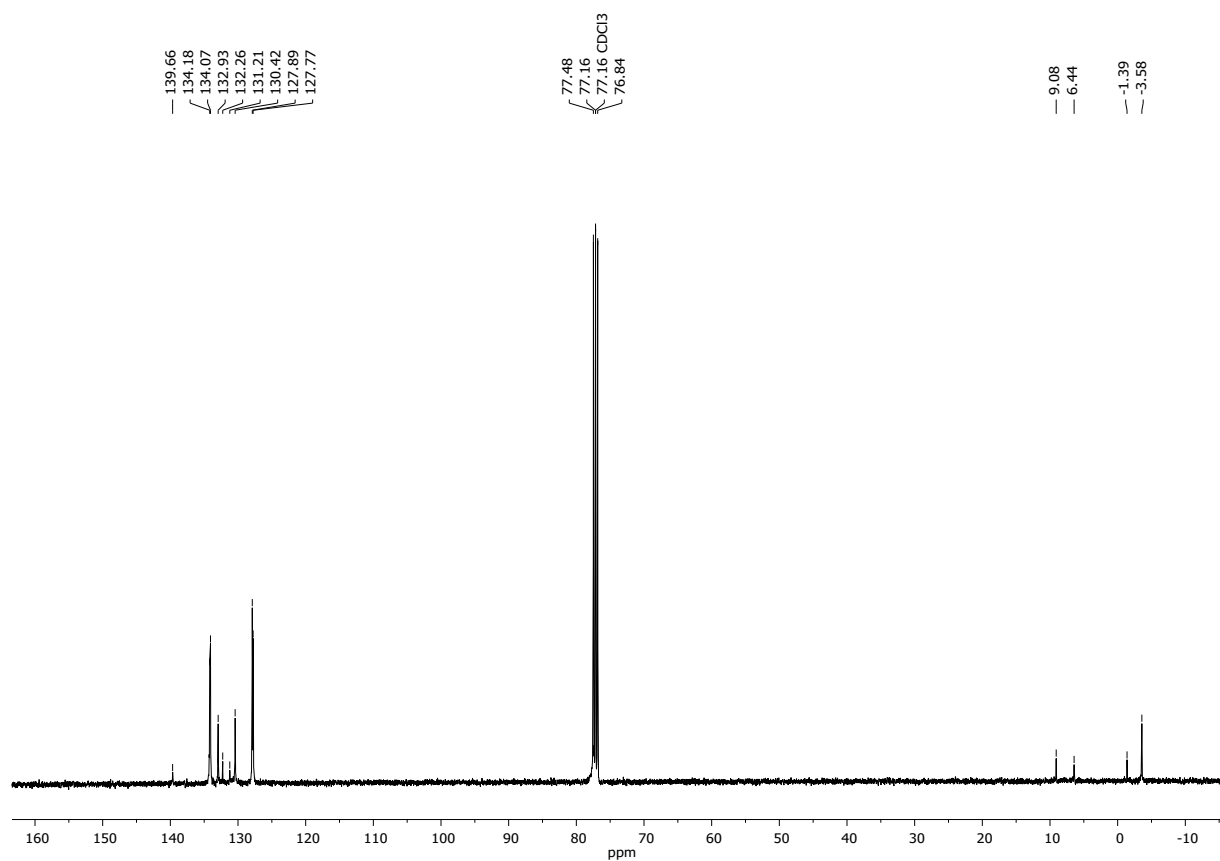

Figure S20  $^{13}\text{C}$  NMR (101 MHz,  $\text{CDCl}_3$ ) spectrum of **6a-g**.

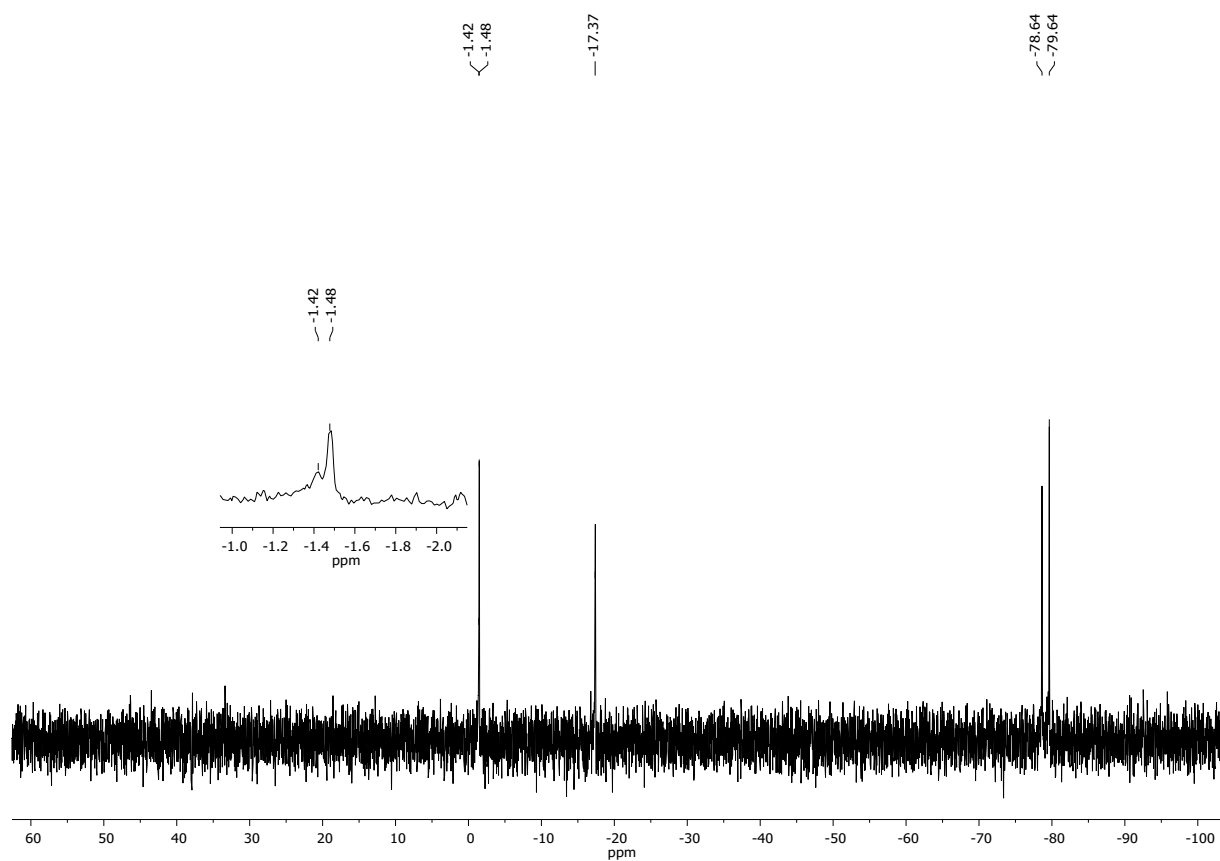

**Figure S21**  $^{29}\text{Si}$  NMR (79.5 MHz,  $\text{CDCl}_3$ ) spectrum of **6a-g**.

## 7b-h

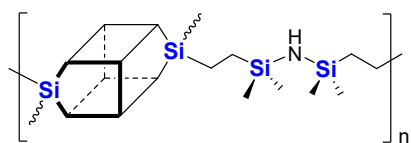

White viscous solid.

**<sup>1</sup>H NMR** (300 MHz, CDCl<sub>3</sub>, ppm): δ = -0.19 (s, SiCH<sub>3</sub>), -0.03 (s, SiCH<sub>3</sub>), 0.30 (s, SiCH<sub>3</sub>), 0.39-0.53 (m, -Si-CH<sub>2</sub>-), 0.93-1.04 (m, -CH<sub>2</sub>-, terminal bond), 1.65 (s, N-H- terminal bonds), 7.16-7.54 (m, Ph).

**<sup>13</sup>C NMR** (101 MHz, CDCl<sub>3</sub>, ppm): δ = -1.51 (SiCH<sub>3</sub>), 0.01 (SiCH<sub>3</sub>), 1.02 (SiCH<sub>3</sub>), 8.82 (-Si-CH<sub>2</sub>-), 9.76 (-Si-CH<sub>2</sub>-), 127.76-127.99 (Ph), 130.42-130.50 (Ph), 131.28 (Ph), 132.35 (Ph), 134.08-134.35 (Ph).

**<sup>29</sup>Si NMR** (79.5 MHz, CDCl<sub>3</sub>, ppm): δ = 4.67, (Si(CH<sub>3</sub>)), 4.43 (Si(CH<sub>3</sub>)), -16.54 (Si(CH<sub>3</sub>)- terminal bond), -16.89 (Si(CH<sub>3</sub>)), -78.67, -79.58, -79.66 (-Si-Ph).

**IR** (ATR, cm<sup>-1</sup>): 3636.43, 3366.73 (N-H), 3072.79, 3050.46, 3027.52 (C-H phenyl), 2955.94, 2910.78 (C-H), 1594.22, 1430.03 (C=C phenyl), 1256.39 (Si-C), 1073.02, 1027.73 (Si-O-Si), 997.47 (C-H phenyl).

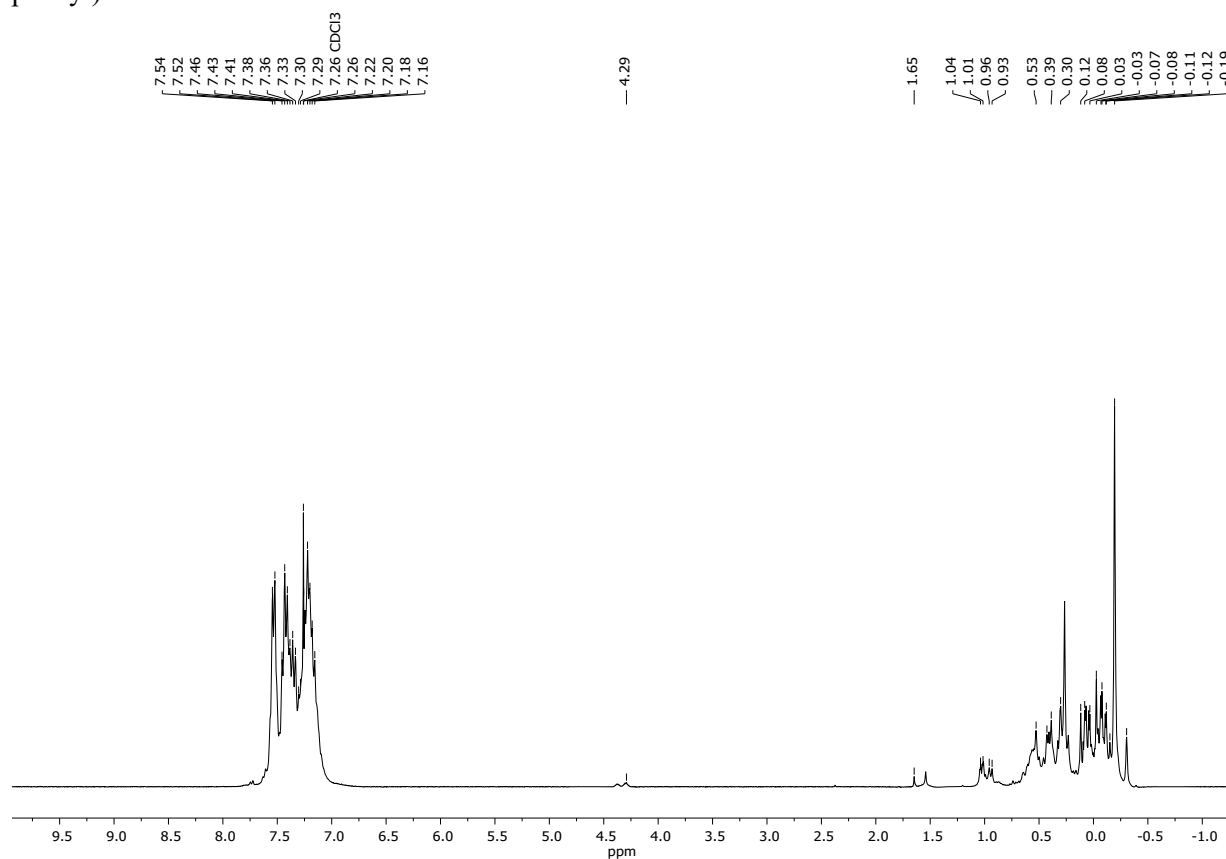

Figure S22 <sup>1</sup>H NMR (300 MHz, CDCl<sub>3</sub>) spectrum of 7b-h.



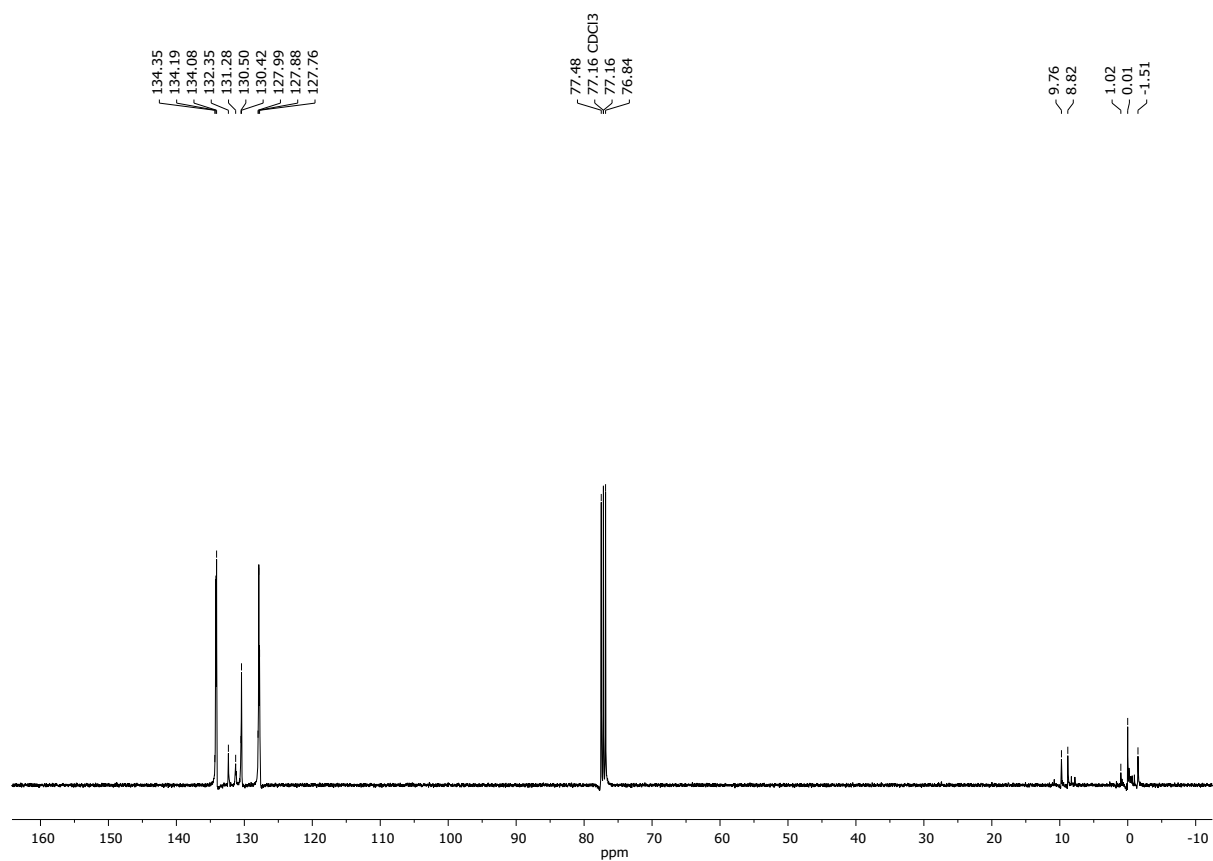

Figure S23  $^{13}\text{C}$  NMR (101 MHz,  $\text{CDCl}_3$ ) spectrum of **7b-h**.

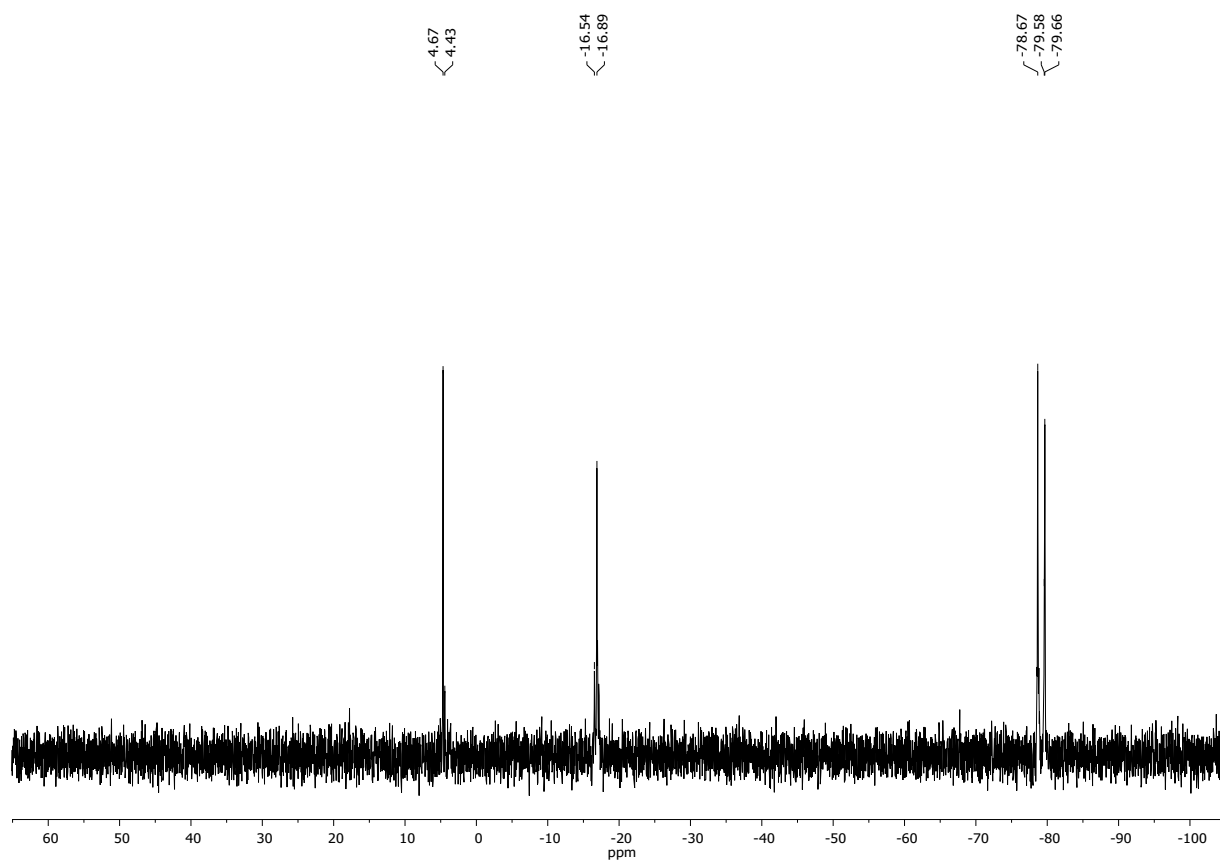

**Figure S24**  $^{29}\text{Si}$  NMR (79.5 MHz,  $\text{CDCl}_3$ ) spectrum of **7b-h**.

**7c-d**

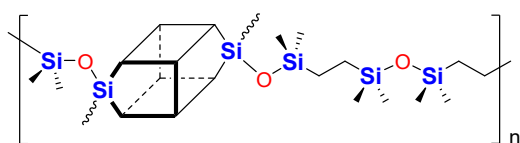

White viscous solid.

**<sup>1</sup>H NMR** (300 MHz, CDCl<sub>3</sub>, ppm): δ = -0.13 (s, SiCH<sub>3</sub>), -0.09 (s, SiCH<sub>3</sub>), -0.00 (s, SiCH<sub>3</sub>), 0.26 (s, SiCH<sub>3</sub>), 0.32-0.39 (m, -Si-CH<sub>2</sub>-), 0.78-0.98 (m, -Si-CH<sub>2</sub>-), 5.66 (dd, *J*<sub>H-H</sub> = 20.2, 3.9 Hz, terminal bond), 5.75 (dd, *J*<sub>H-H</sub> = 15.0, 3.9 Hz, terminal bond), 6.06 (dd, *J*<sub>H-H</sub> = 20.2, 14.9 Hz, terminal bond), 7.16-7.57 (m, Ph).

**<sup>13</sup>C NMR** (101 MHz, CDCl<sub>3</sub>, ppm): δ = -2.60 (SiCH<sub>3</sub>), -0.60 (SiCH<sub>3</sub>), -0.33 (SiCH<sub>3</sub>), 1.19 (SiCH<sub>3</sub>), 9.37 (Si-CH<sub>2</sub>-), 9.49 (Si-CH<sub>2</sub>-), 127.69-128.86 (Ph), 130.41-130.46 (Ph), 131.13 (Ph), 132.05 (Ph), 134.10-134.18(Ph).

**<sup>29</sup>Si NMR** (79.5 MHz, CDCl<sub>3</sub>, ppm): δ = 10.87 (Si(CH<sub>3</sub>)<sub>2</sub>), 8.16 (Si(CH<sub>3</sub>)<sub>2</sub>), 8.12 (Si(CH<sub>3</sub>)<sub>2</sub>), -64.28 (SiCH<sub>3</sub>), -79.29, -79.58 (-Si-Ph).

**IR** (ATR, cm<sup>-1</sup>): 3073.01, 3051.71 (C-H phenyl), 2957.50, 2907.67 (C-H), 1594.29, 1430.14 (C=C phenyl), 1254.44 (Si-C), 1100.10, 1027.08 (Si-O-Si), 997.64 (C-H phenyl).

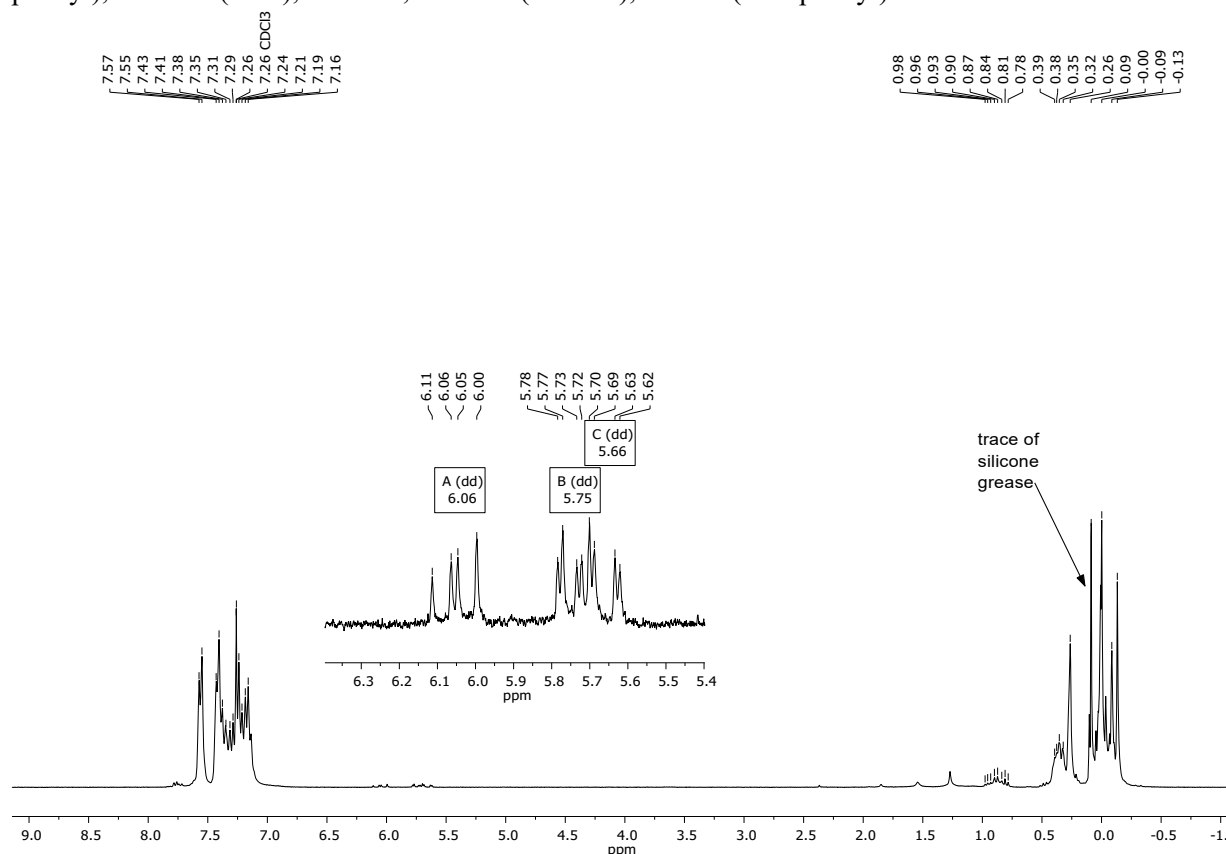

**Figure S25** <sup>1</sup>H NMR (300 MHz, CDCl<sub>3</sub>) spectrum of **7c-d**.

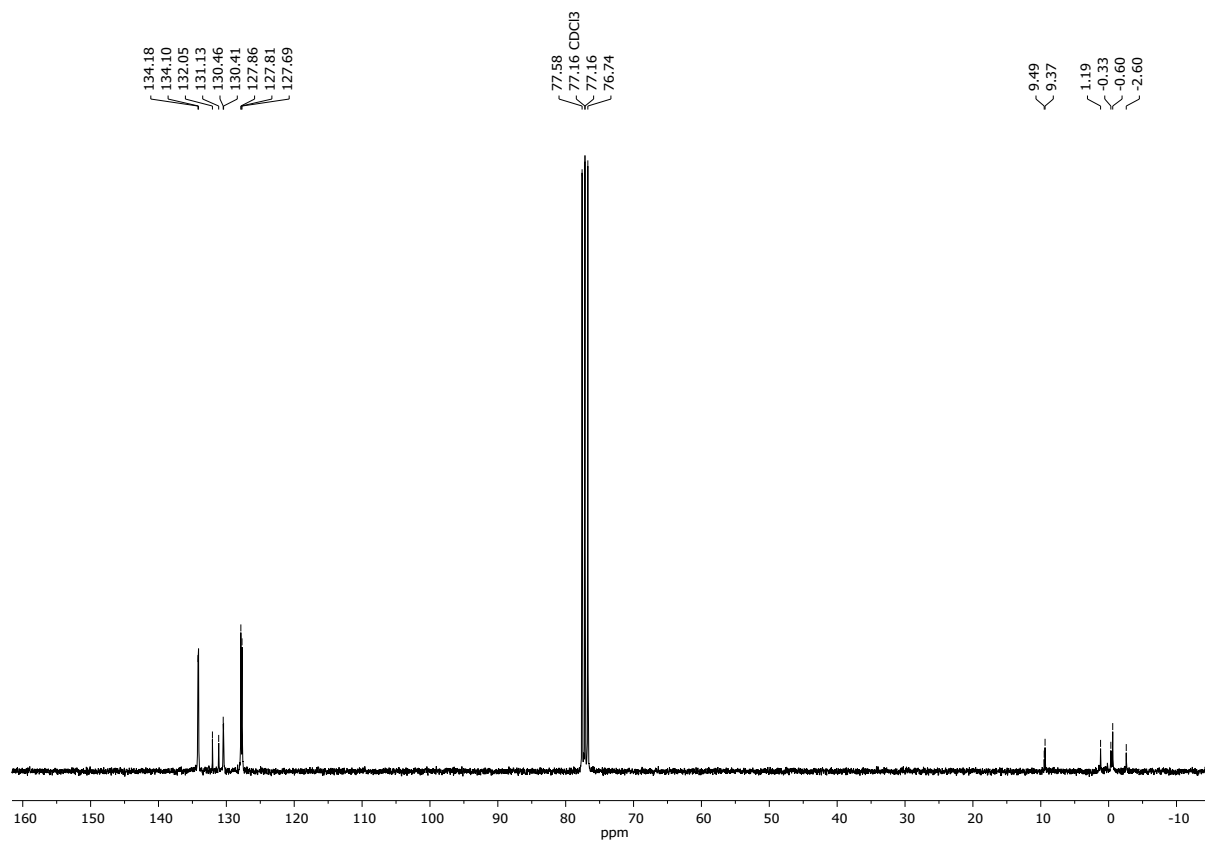

Figure S26  $^{13}\text{C}$  NMR (101 MHz,  $\text{CDCl}_3$ ) spectrum of **7c-d**.

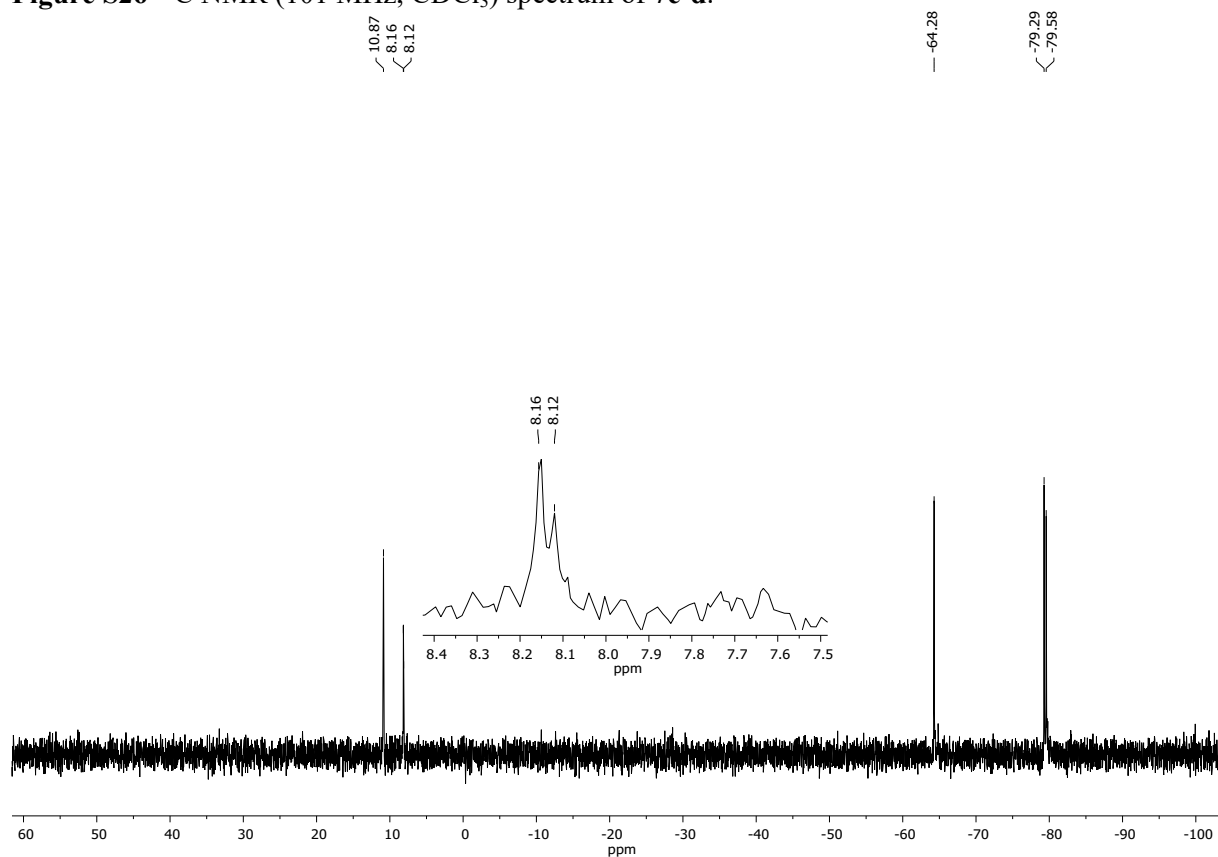

**Figure S27**  $^{29}\text{Si}$  NMR (79.5 MHz,  $\text{CDCl}_3$ ) spectrum of **7c-d**.

7c-e

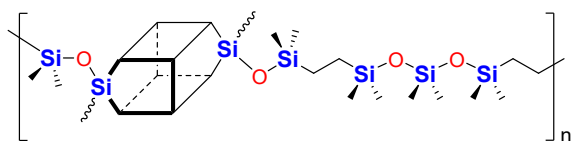

White viscous solid.

**<sup>1</sup>H NMR** (300 MHz, CDCl<sub>3</sub>, ppm): δ = -0.10 (s, SiCH<sub>3</sub>), -0.01 (s, SiCH<sub>3</sub>), 0.02 (s, SiCH<sub>3</sub>), 0.25 (s, SiCH<sub>3</sub>), 0.34-0.38 (m, -Si-CH<sub>2</sub>-), 0.83-0.97 (m, -Si-CH<sub>2</sub>-), 7.15-7.56 (m, Ph).

**<sup>13</sup>C NMR** (101 MHz, CDCl<sub>3</sub>, ppm): δ = -2.60 (SiCH<sub>3</sub>), -0.60 (SiCH<sub>3</sub>), -0.49 (SiCH<sub>3</sub>), 1.19 (SiCH<sub>3</sub>), 1.43 (SiCH<sub>3</sub>), 9.31 (Si-CH<sub>2</sub>-), 9.36 (Si-CH<sub>2</sub>-), 127.59-128.86 (Ph), 130.45 (Ph), 132.05 (Ph), 134.09-134.23 (Ph).

**<sup>29</sup>Si NMR** (79.5 MHz, CDCl<sub>3</sub>, ppm): δ = 10.91 (Si(CH<sub>3</sub>)), 10.92 (Si(CH<sub>3</sub>)), 8.16 (Si(CH<sub>3</sub>)), -21.87 (Si(CH<sub>3</sub>)), -21.73 (Si(CH<sub>3</sub>)), -64.76 ((SiCH<sub>3</sub>)), -64.23 (Si(CH<sub>3</sub>)), -79.74, -79.52, -79.23 (-Si-Ph).

**IR** (ATR, cm<sup>-1</sup>): 3072.97, 3051.66 (C-H phenyl), 2959.37, 2907.32 (C-H), 1594.36, 1430.23 (C=C phenyl), 1257.25 (Si-C), 1108.67, 1028.65 (Si-O-Si), 997.23 (C-H phenyl).

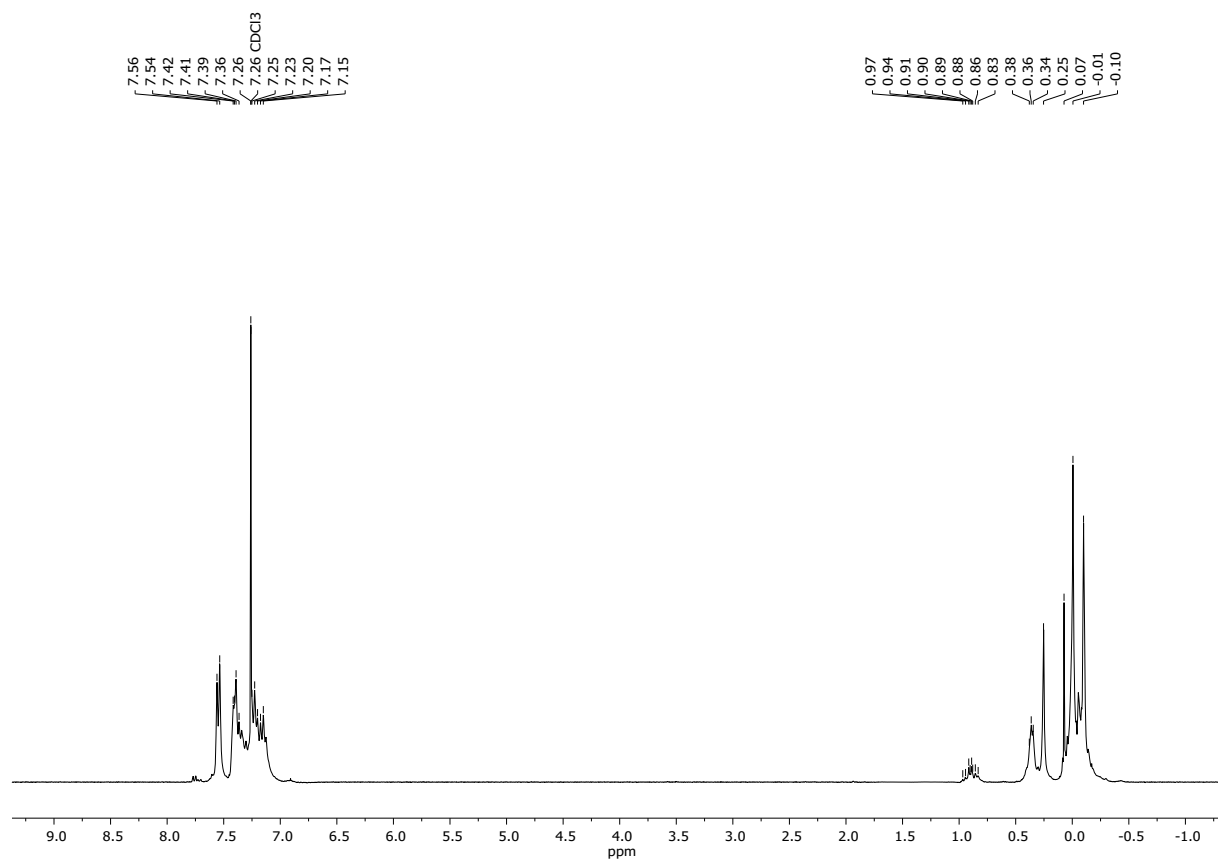

Figure S28 <sup>1</sup>H NMR (300 MHz, CDCl<sub>3</sub>) spectrum of 7c-e.

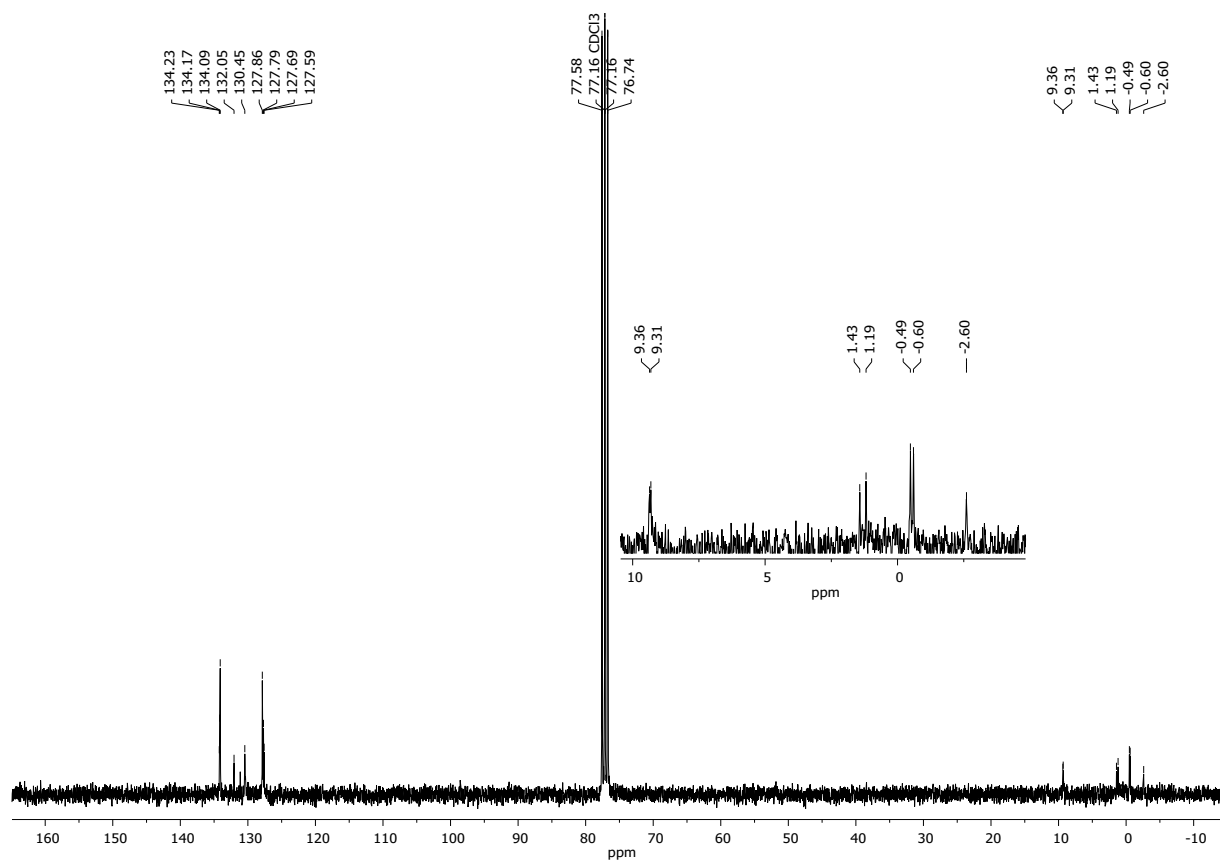

Figure S29  $^{13}\text{C}$  NMR (101 MHz,  $\text{CDCl}_3$ ) spectrum of **7c-e**.

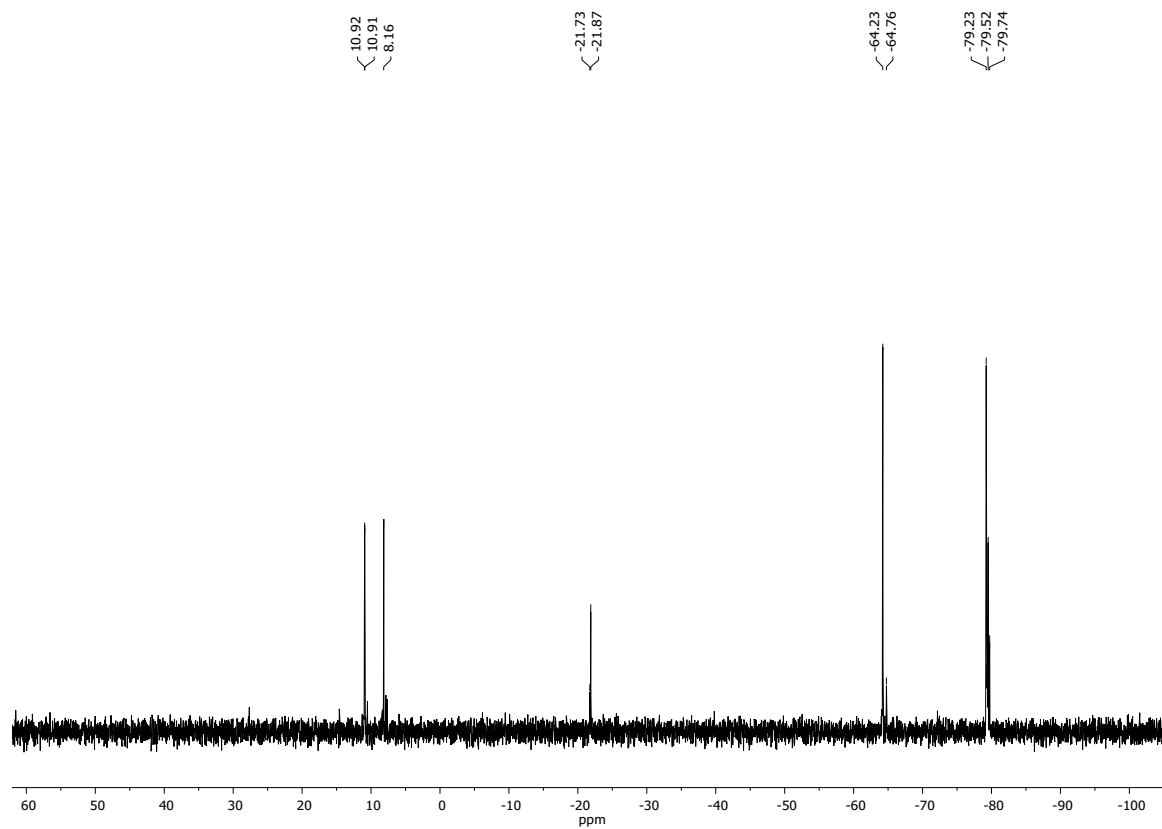

Figure S30  $^{29}\text{Si}$  NMR (79.5 MHz,  $\text{CDCl}_3$ ) spectrum of **7c-e**.

**7c-f**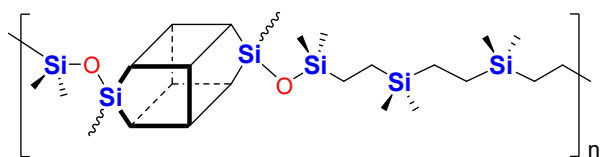

White viscous solid.

$^1\text{H NMR}$  (300 MHz,  $\text{CDCl}_3$ , ppm):  $\delta$  = -0.23 (s,  $\text{SiCH}_3$ ), -0.22 (s,  $\text{SiCH}_3$ ), 0.29 (s,  $\text{SiCH}_3$ ), -0.07- -0.19 (m,  $-\text{CH}_2-\text{CH}_2-$ ), 0.37-0.56 (m,  $-\text{CH}_2-\text{CH}_2-$ ), 5.92-6.26 (m,  $-\text{CH}=\text{CH}_2-$ , terminal bond), 7.15-7.57 (m, Ph).

$^{13}\text{C NMR}$  (101 MHz,  $\text{CDCl}_3$ , ppm):  $\delta$  = -4.56 ( $\text{SiCH}_3$ ), -1.53 ( $\text{SiCH}_3$ ), -1.01 ( $\text{SiCH}_3$ ), 5.58 ( $\text{Si}-\text{CH}_2-$ ), 6.53 ( $\text{Si}-\text{CH}_2-$ ), 8.94 ( $\text{Si}-\text{CH}_2-$ ), 9.84 ( $\text{Si}-\text{CH}_2-$ ), 127.70-128.87 (Ph), 130.42 (Ph), 132.30 (Ph), 134.05-134.17(Ph).

$^{29}\text{Si NMR}$  (79.5 MHz,  $\text{CDCl}_3$ , ppm):  $\delta$  = 10.74 ( $\text{Si}(\text{CH}_3)_2$ ), 5.76 ( $\text{Si}(\text{CH}_3)_2$ ), 0.17 ( $\text{Si}(\text{CH}_3)_2$ ), -64.26 ( $\text{SiCH}_3$ ), -79.27, -79.55, -79.35, -79.27 ( $-\text{Si}-\text{Ph}$ ).

**IR** (ATR,  $\text{cm}^{-1}$ ): 3072.77, 3051.46 (C-H phenyl), 2953.65, 2905.53 (C-H), 1593.98, 1429.93 (C=C phenyl), 1257.98 (Si-C), 1079.78, 1027.88 (Si-O-Si), 997.58 (C-H phenyl).

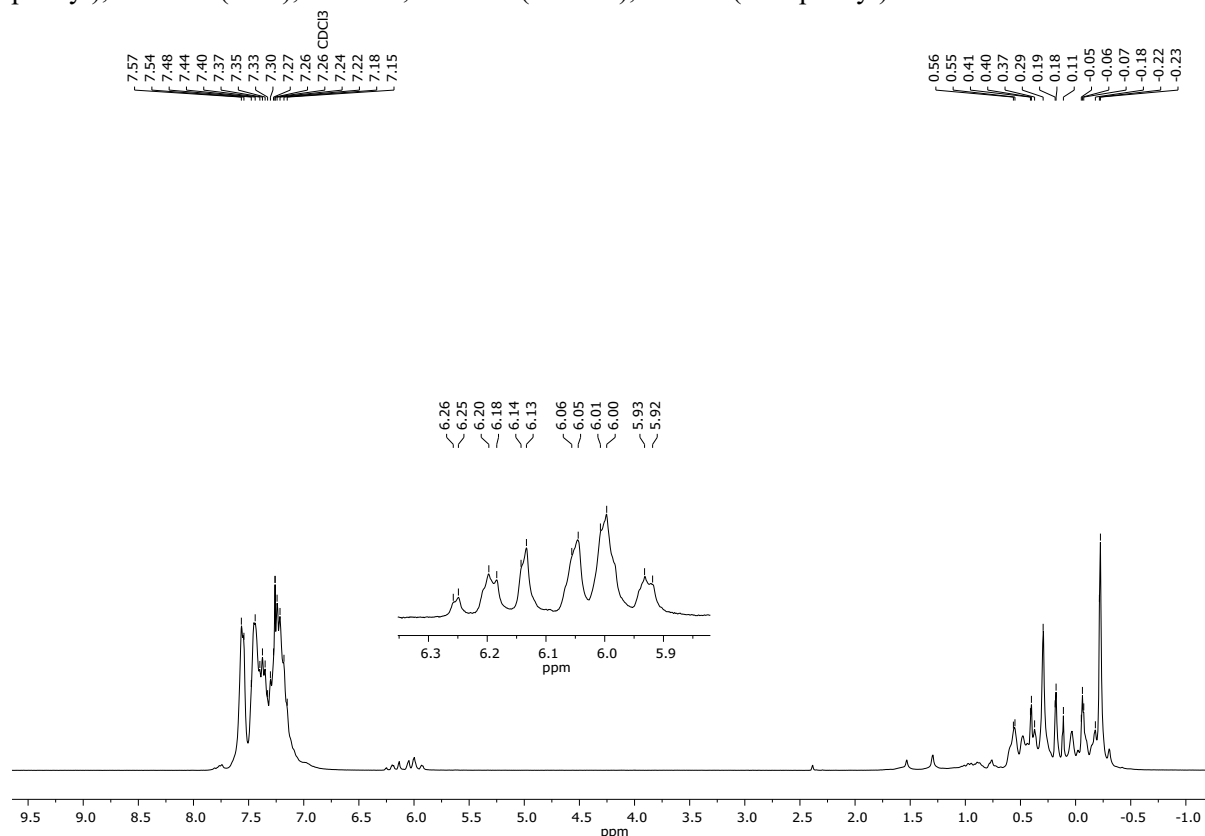

**Figure S31**  $^1\text{H NMR}$  (300 MHz,  $\text{CDCl}_3$ ) spectrum of **7c-f**.



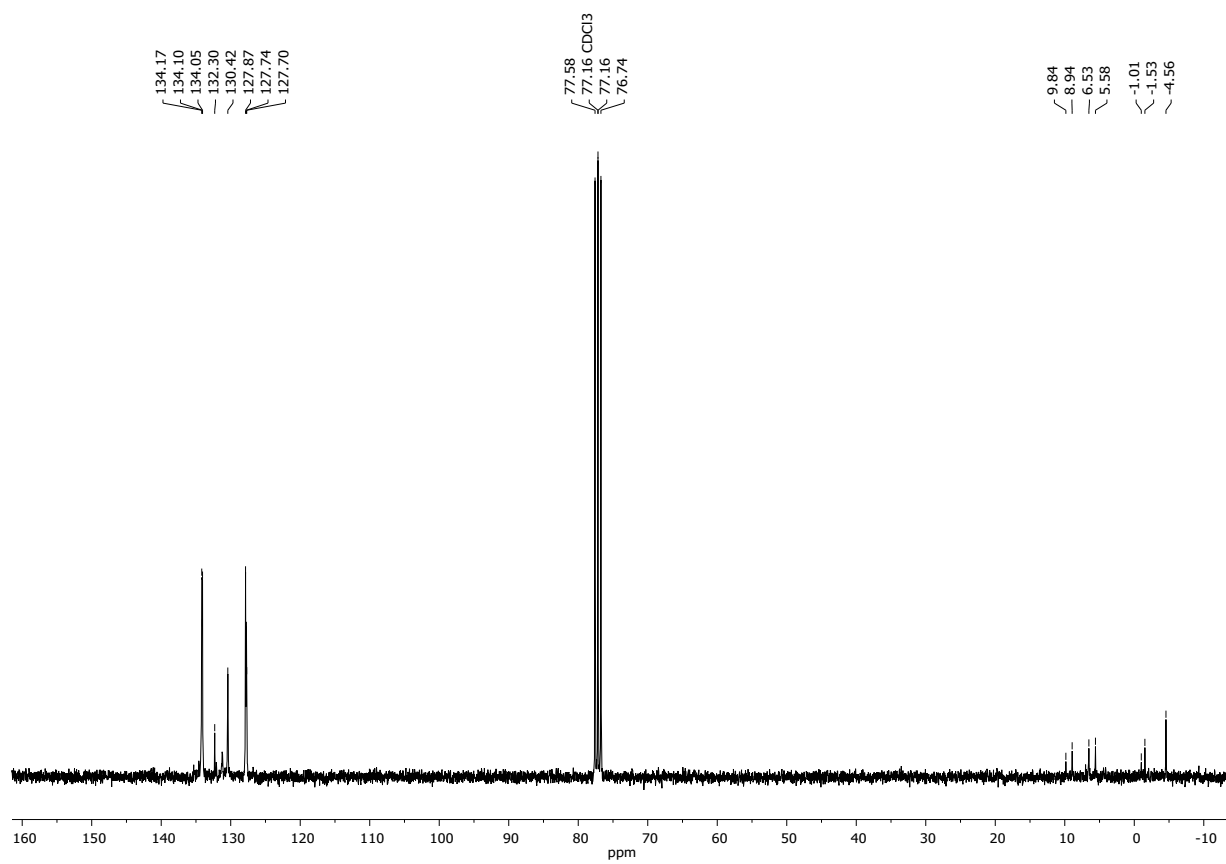

Figure S32  $^{13}\text{C}$  NMR (101 MHz,  $\text{CDCl}_3$ ) spectrum of **7c-f**.

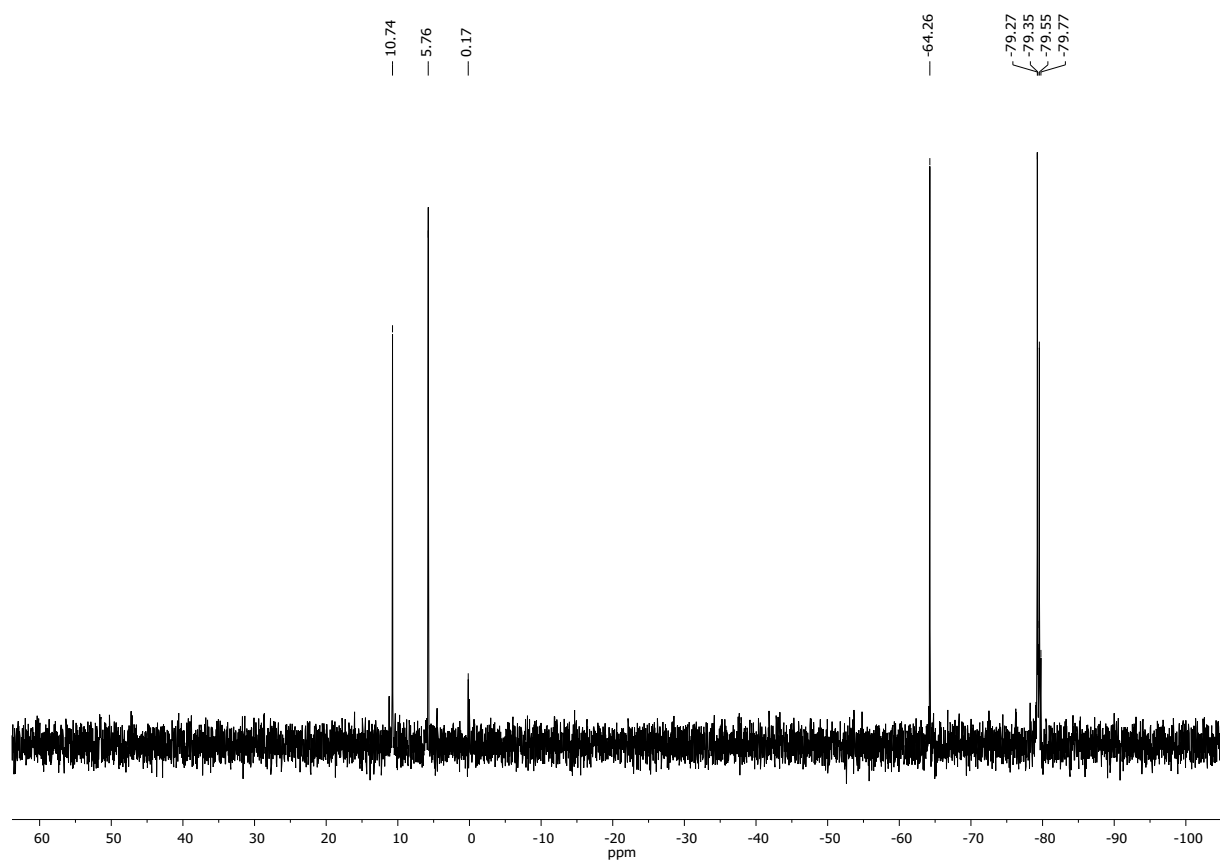

**Figure S33**  $^{29}\text{Si}$  NMR (79.5 MHz,  $\text{CDCl}_3$ ) spectrum of **7c-f**.

7c-g

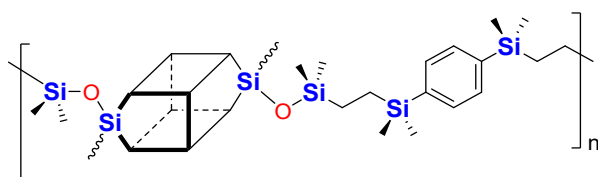

White viscous solid.

$^1\text{H NMR}$  (300 MHz,  $\text{CDCl}_3$ , ppm):  $\delta$  = 0.02 (s,  $\text{SiCH}_3$ ), 0.11 (s,  $\text{SiCH}_3$ ), 0.12 (s,  $\text{SiCH}_3$ ), 0.29 (s,  $\text{SiCH}_3$ ), 0.41-0.47 (m,  $-\text{Si}-\text{CH}_2-$ ), 0.53-0.63 (m,  $-\text{Si}-\text{CH}_2-$ ), 5.68 (dd,  $J_{\text{H-H}} = 20.2, 3.9$  Hz, terminal bond), 5.77 (dd,  $J_{\text{H-H}} = 15.0, 3.9$  Hz, terminal bond), 6.07 (dd,  $J_{\text{H-H}} = 20.1, 15.0$  Hz, terminal bond), 7.15-7.46 (m, Ph), 7.57-7.60 (d, Ph).

$^{13}\text{C NMR}$  (101 MHz,  $\text{CDCl}_3$ , ppm):  $\delta$  = -3.63 ( $\text{SiCH}_3$ ), -2.59 ( $\text{SiCH}_3$ ), -0.57 ( $\text{SiCH}_3$ ), 1.19 ( $\text{SiCH}_3$ ), 6.88 ( $\text{Si}-\text{CH}_2-$ ), 10.04 ( $\text{Si}-\text{CH}_2-$ ), 127.71-128.88 (Ph), 130.43-130.48 (Ph), 131.12 (Ph), 132.04 (Ph), 132.94 (Ph), 134.10-134.19 (Ph), 140.01 (Ph).

$^{29}\text{Si NMR}$  (79.5 MHz,  $\text{CDCl}_3$ , ppm):  $\delta$  = 10.72 ( $\text{Si}(\text{CH}_3)$ ), -1.38 ( $\text{Si}(\text{CH}_3)$ ), -1.61 ( $\text{Si}(\text{CH}_3)$ ), -64.21 ( $\text{SiCH}_3$ ), -79.26, -79.55 ( $-\text{Si}-\text{Ph}$ ).

**IR** (ATR,  $\text{cm}^{-1}$ ): 3072.70, 3050.43 (C-H phenyl), 2957.92, 2906.39 (C-H), 1594.22, 1430.02 (C=C phenyl), 1252.50 (Si-C), 1100.03, 1042.26 (Si-O-Si), 997.78 (C-H phenyl).

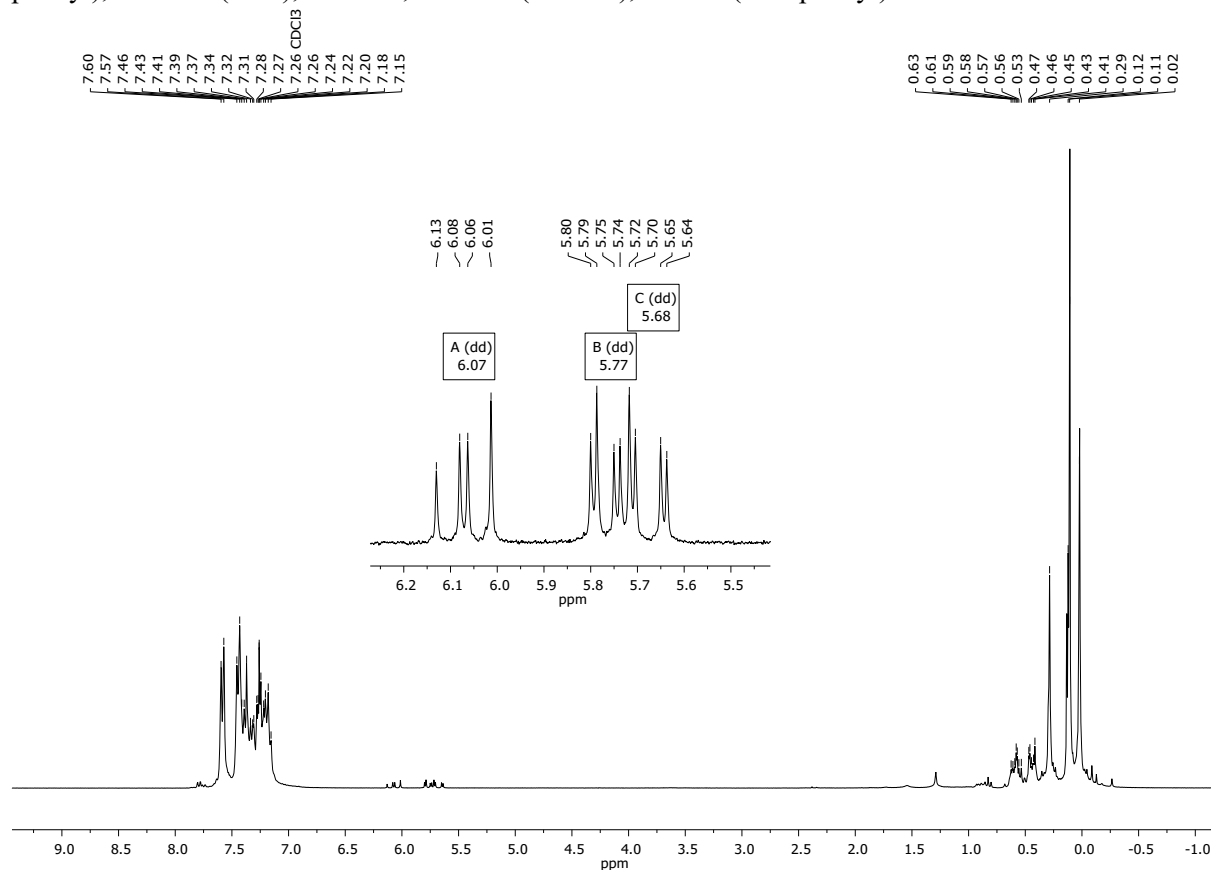

Figure S34  $^1\text{H NMR}$  (300 MHz,  $\text{CDCl}_3$ ) spectrum of 7c-g.

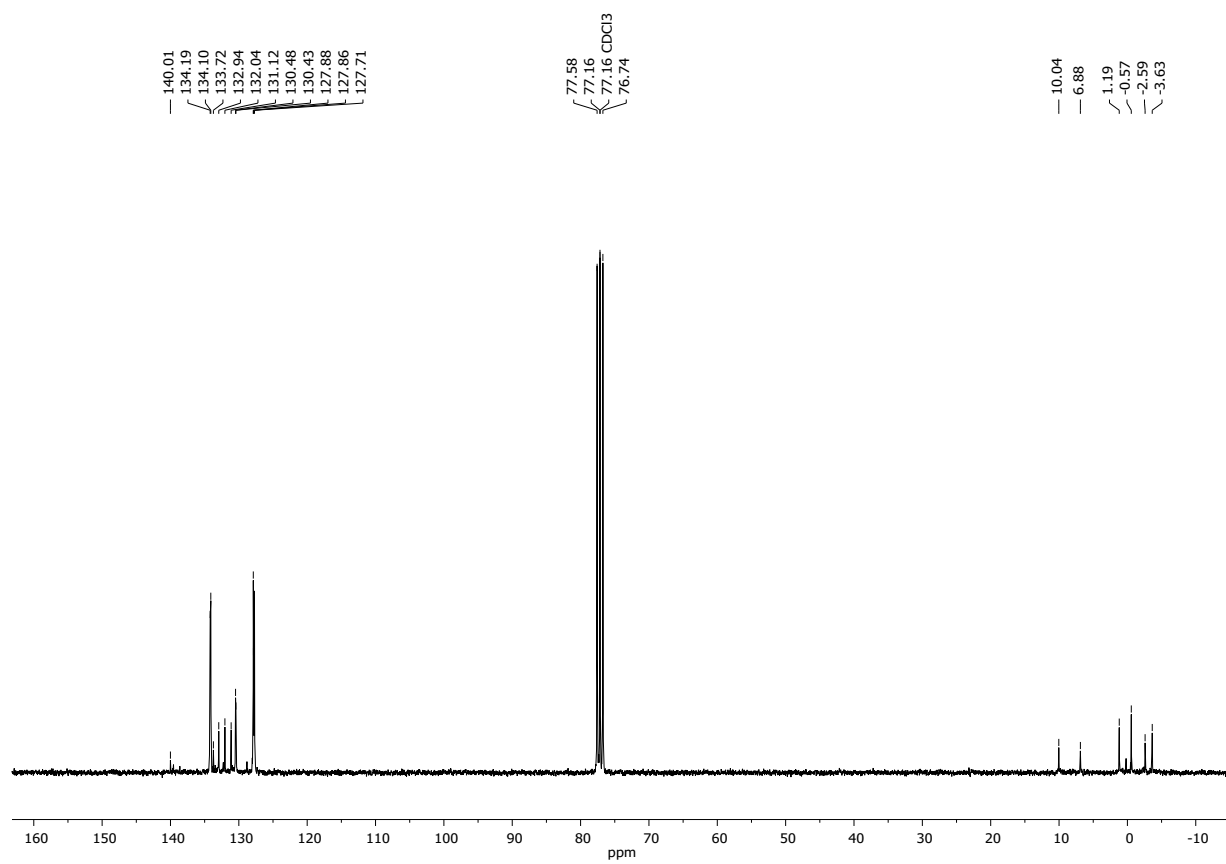

Figure S35  $^{13}\text{C}$  NMR (101 MHz,  $\text{CDCl}_3$ ) spectrum of **7c-g**.

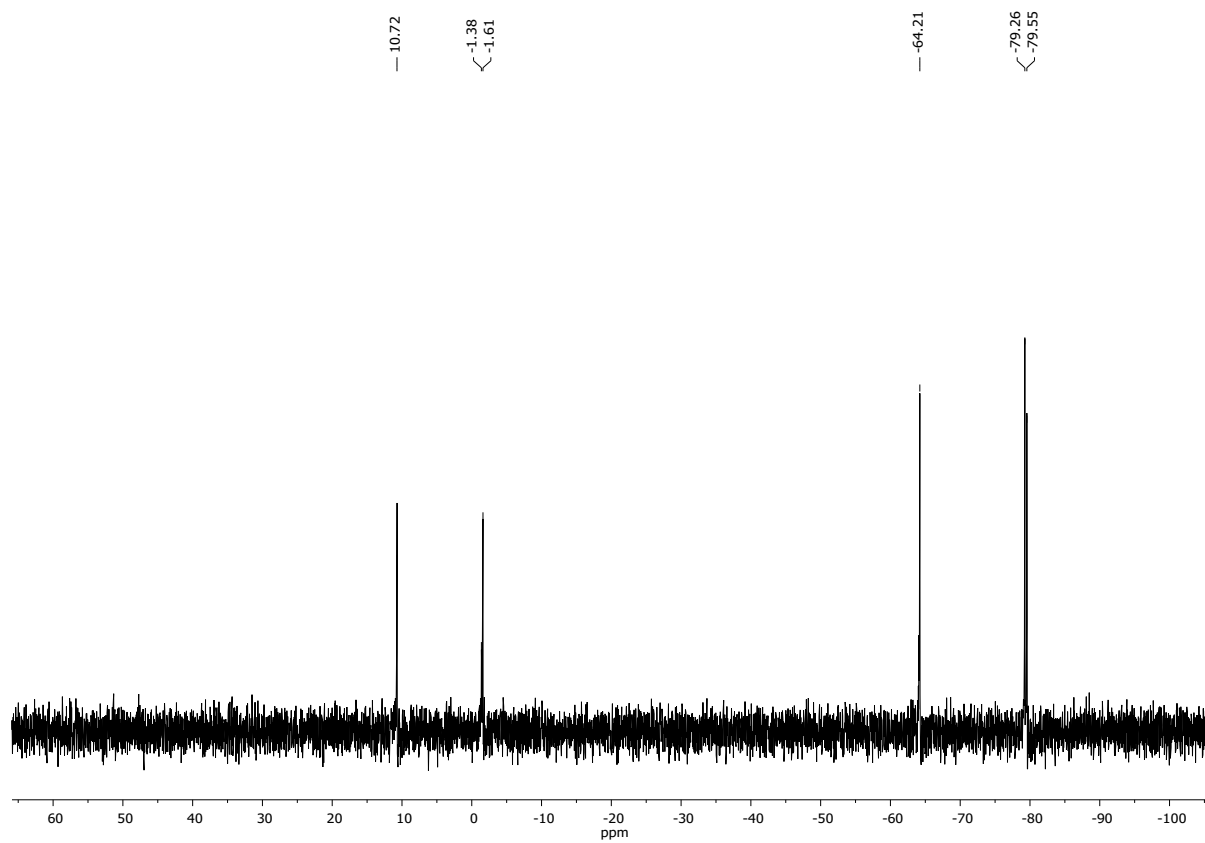

**Figure S36**  $^{29}\text{Si}$  NMR (79.5 MHz,  $\text{CDCl}_3$ ) spectrum of **7c-g**.

### 7c-h

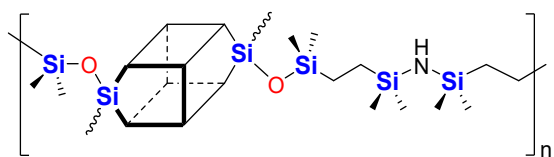

White viscous solid.

**<sup>1</sup>H NMR** (300 MHz, CDCl<sub>3</sub>, ppm): δ = -0.15 (s, SiCH<sub>3</sub>), -0.11- -0.05 (m, -Si-CH<sub>2</sub>-), 0.00 (s, SiCH<sub>3</sub>), 0.02 (s, SiCH<sub>3</sub>), 0.26 (s, SiCH<sub>3</sub>), 0.86-0.93 (m, -Si-CH<sub>2</sub>-), 4.39 (s, N-H terminal bond), 7.15-7.46 (m, Ph), 7.57-7.60 (d, Ph).

**<sup>13</sup>C NMR** (101 MHz, CDCl<sub>3</sub>, ppm): δ = -2.56 (SiCH<sub>3</sub>), -0.55 (SiCH<sub>3</sub>), 0.08 (SiCH<sub>3</sub>), 1.08 (SiCH<sub>3</sub>), 9.98 (Si-CH<sub>2</sub>-), 10.16 (Si-CH<sub>2</sub>-), 127.62-127.88 (Ph), 130.35-130.57 (Ph), 131.18 (Ph), 132.11 (Ph), 134.14-134.28 (Ph).

**<sup>29</sup>Si NMR** (79.5 MHz, CDCl<sub>3</sub>, ppm): δ = 10.94 (Si(CH<sub>3</sub>)<sub>2</sub>), 4.61 (Si(CH<sub>3</sub>)<sub>2</sub>), 4.31 (Si(CH<sub>3</sub>)<sub>2</sub>), -64.25 (SiCH<sub>3</sub>), -64.62 (SiCH<sub>3</sub>, terminal bond), -79.26, -79.34, -79.76 (-Si-Ph).

**IR** (ATR, cm<sup>-1</sup>): 3636.34, 3366.30 (N-H), 3072.99, 3051.54 (C-H phenyl), 2954.91, 2905.21 (C-H), 1594.28, 1430.10 (C=C phenyl), 1251.84 (Si-C), 1099.02, 1042.86 (Si-O-Si), 997.57 (C-H phenyl).

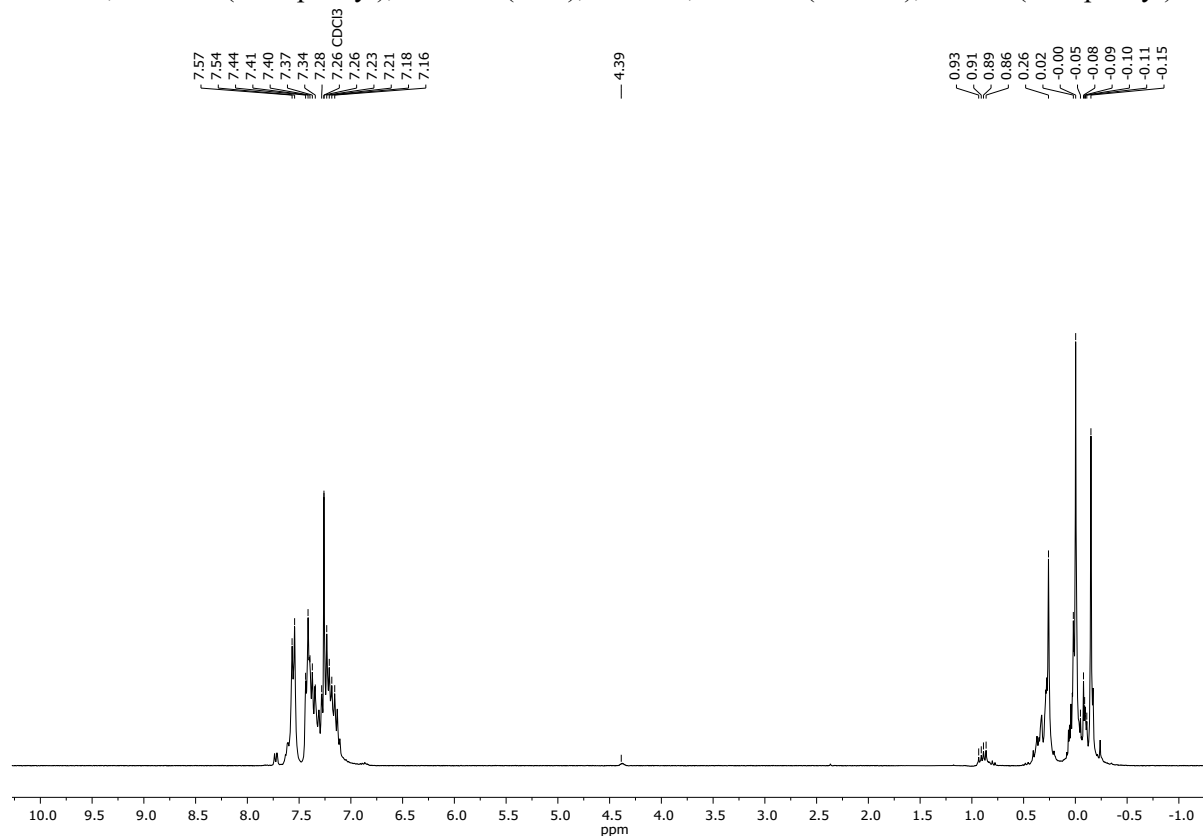

Figure S37 <sup>1</sup>H NMR (300 MHz, CDCl<sub>3</sub>) spectrum of 7c-h.

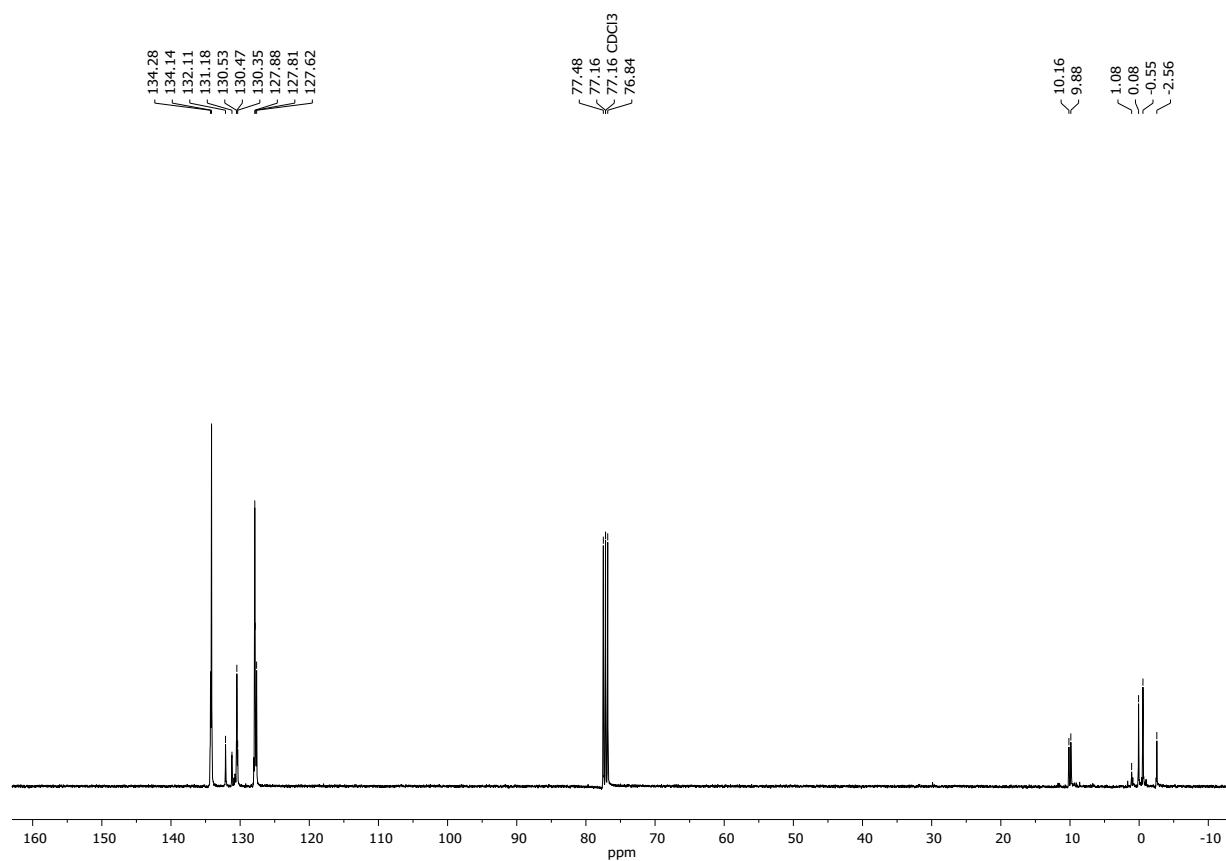

**Figure S38**  $^{13}\text{C}$  NMR (101 MHz,  $\text{CDCl}_3$ ) spectrum of **7c-h**.

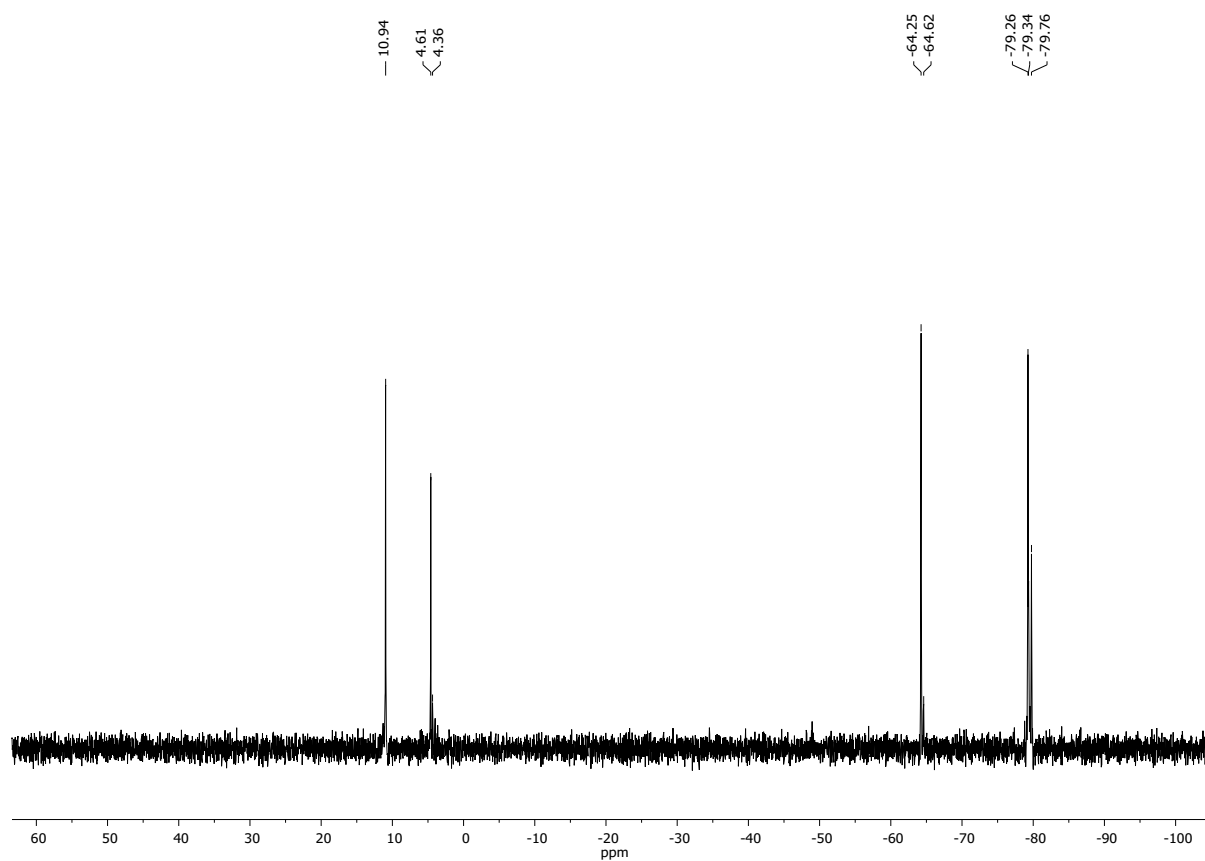

**Figure S39**  $^{29}\text{Si}$  NMR (79.5 MHz,  $\text{CDCl}_3$ ) spectrum of **7c-h**.



## 5. GPC analysis of obtained products

Table S2. Molecular weights of co-polymers obtained *via* hydrosilylation of divinylsubstituted organosilicon derivatives (**4d**, **4f**, and **4g**) with dihydro-substituted DDSQ (**1a**) and divinylsubstituted DDSQs (**1b**, **1c**) with of dihydro-substituted organosilicon derivatives (**5d-h**) concerning the main fractions and the highest molecular weights fractions contents.

| Entry | Sample        | DDSQ |    | Main Fraction |        |           |             |        | Highest Fraction |         |           |             |        |
|-------|---------------|------|-------------------------------------------------------------------------------------|---------------|--------|-----------|-------------|--------|------------------|---------|-----------|-------------|--------|
|       |               |      |                                                                                     | $M_w$         | $M_n$  | $\bar{D}$ | Content [%] | $DP_n$ | $M_w$            | $M_n$   | $\bar{D}$ | Content [%] | $DP_n$ |
| 1     | 6a-d-24h      | 1a   |    | 8500          | 7100   | 1.2       | 63.4        | 5      | 8500             | 7100    | 1.2       | 63.4        | 5      |
| 2     | 6a-d-72h      |      |                                                                                     | 9200          | 7300   | 1.3       | 68.3        | 6      | 9200             | 7300    | 1.3       | 68.3        | 6      |
| 3     | 6a-d-24h PtO2 |      |                                                                                     | 8300          | 6900   | 1.2       | 59.3        | 5      | 8300             | 6900    | 1.2       | 59.3        | 5      |
| 4     | 6a-f-24h      |      |    | 9900          | 7800   | 1.3       | 67.1        | 6      | 9900             | 7800    | 1.3       | 67.1        | 6      |
| 5     | 6a-f-72h      |      |                                                                                     | 12400         | 6900   | 1.8       | 100.0       | 5      | 12400            | 6900    | 1.8       | 100.0       | 5      |
| 6     | 6a-f-24h PtO2 |      |                                                                                     | 8700          | 7400   | 1.2       | 58.3        | 5      | 8700             | 7400    | 1.2       | 58.3        | 5      |
| 7     | 6a-g-24h      |      |    | 22800         | 9500   | 2.4       | 100.0       | 7      | 22800            | 9500    | 2.4       | 100.0       | 7      |
| 8     | 6a-g-72h      |      |                                                                                     | 26300         | 10000  | 2.6       | 100.0       | 7      | 26300            | 10000   | 2.6       | 100.0       | 7      |
| 9     | 6a-g-24h PtO2 |      |                                                                                     | 16800         | 10500  | 1.6       | 77.5        | 8      | 16700            | 10500   | 1.6       | 77.5        | 8      |
| 10    | 7b-d-24h      | 1b   |    | 41500         | 27700  | 1.5       | 46.3        | 21     | 41500            | 27700   | 1.5       | 46.3        | 21     |
| 11    | 7b-d-72h      |      |                                                                                     | 16600         | 9100   | 1.8       | 75.4        | 7      | 119800           | 90800   | 1.3       | 24.6        | 68     |
| 12    | 7b-d-24h PtO2 |      |                                                                                     | 12500         | 9700   | 1.3       | 59.6        | 7      | 12500            | 9700    | 1.3       | 59.6        | 7      |
| 13    | 7b-e-24h      |      |   | 18600         | 9800   | 1.9       | 40.0        | 7      | 2455800          | 1531900 | 1.6       | 21.1        | 1083   |
| 14    | 7b-e-72h      |      |                                                                                     | 261500        | 152400 | 1.7       | 38.8        | 108    | 2837300          | 1593700 | 1.8       | 23.2        | 1127   |
| 15    | 7b-f-24h      |      |  | 5500          | 4900   | 1.1       | 68.1        | 4      | 5500             | 4900    | 1.1       | 68.1        | 4      |
| 16    | 7b-f-72h      |      |                                                                                     | 10100         | 8000   | 1.3       | 66.3        | 6      | 10100            | 8000    | 1.3       | 66.3        | 6      |
| 17    | 7b-g-24h      |      |  | 13900         | 9200   | 1.5       | 68.8        | 7      | 13900            | 9200    | 1.5       | 68.8        | 7      |
| 18    | 7b-g-72h      |      |                                                                                     | 17700         | 9100   | 1.9       | 100.0       | 7      | 17800            | 9100    | 1.9       | 100.0       | 7      |
| 19    | 7b-g-24h PtO2 |      |                                                                                     | 13700         | 9100   | 1.5       | 67.5        | 7      | 13600            | 9100    | 1.5       | 67.5        | 7      |
| 20    | 7b-h-24h      |      |  | 2400          | 1600   | 1.5       | 100.0       | 1      | 2400             | 1600    | 1.5       | 100.0       | 1      |
| 21    | 7b-h-72h      |      |                                                                                     | 13100         | 8100   | 1.6       | 41.8        | 6      | 13100            | 8100    | 1.6       | 41.8        | 6      |
| 22    | 7b-h-24h PtO2 |      |                                                                                     | 1200          | 1000   | 1.2       | 88.8        | 1      | 2900             | 2800    | 1.0       | 11.2        | 2      |

|           |                      |           |      |        |        |      |       |      |         |         |      |       |      |
|-----------|----------------------|-----------|------|--------|--------|------|-------|------|---------|---------|------|-------|------|
| <b>23</b> | <b>7c-d-24h</b>      | <b>1c</b> |      | 18300  | 8400   | 2.2  | 100.0 | 6    | 18300   | 8400    | 2.2  | 100.0 | 6    |
| <b>24</b> | <b>7c-d-72h</b>      |           | (d)  | 67000  | 15100  | 4.4  | 100.0 | 10   | 67000   | 15100   | 4.4  | 100.0 | 10   |
| <b>25</b> | <b>7c-e-24h</b>      |           |      | 23800  | 15800  | 1.5  | 40.5  | 10   | 3927400 | 2205800 | 1.8  | 10.0  | 1412 |
| <b>26</b> | <b>7c-e-72h</b>      |           | (e)  | 213500 | 122900 | 1.7  | 39.7  | 79   | 3752700 | 1639900 | 2.3  | 22.9  | 1049 |
| <b>27</b> | <b>7c-f-24h</b>      |           |      | 6100   | 5500   | 1.1  | 62.9  | 4    | 6100    | 5500    | 1.1  | 62.9  | 4    |
| <b>28</b> | <b>7c-f-72h</b>      |           | (f)  | 127878 | 51600  | 2.5  | 81.3  | 34   | 127878  | 51600   | 2.5  | 81.3  | 34   |
| <b>29</b> | <b>7c-g-24h</b>      |           |      | 16711  | 11000  | 1.5  | 56.2  | 7    | 16711   | 11000   | 1.5  | 56.2  | 7    |
| <b>30</b> | <b>7c-g-72h</b>      |           | (g)  | 43095  | 30991  | 1.4  | 38.7  | 20   | 43095   | 31000   | 1.4  | 38.7  | 20   |
| <b>31</b> | <b>7c-h-24h</b>      |           |      | 4474   | 3107   | 1.4  | 100.0 | 2    | 4474    | 3100    | 1.4  | 100.0 | 2    |
| <b>32</b> | <b>7c-h-72h</b>      |           | (h)  | 46545  | 13142  | 3.5  | 97.7  | 9    | 46545   | 13100   | 3.5  | 97.7  | 9    |
| <b>33</b> | <b>7c-h-24h PtO2</b> |           | 1601 | 1527   | 1.0    | 80.4 | 1     | 3693 | 3500    | 1.1     | 19.6 | 2     |      |

Reaction conditions:  $[\text{Pt}_2(\text{dvds})_3]$  and  $\text{PtO}_2 - 10^{-3}$  per 1 mol of Si-H, equimolar stoichiometry of Si-H and Si-HC=CH<sub>2</sub> reagents, e.g. **[1a]:[4d]** = 1:1, toluene ( $m_{\text{DSSQ}}/V_{\text{tol}}=33\text{mg/mL}$ ), 95 °C.  $\text{DP}_n$  = degree of polymerization.

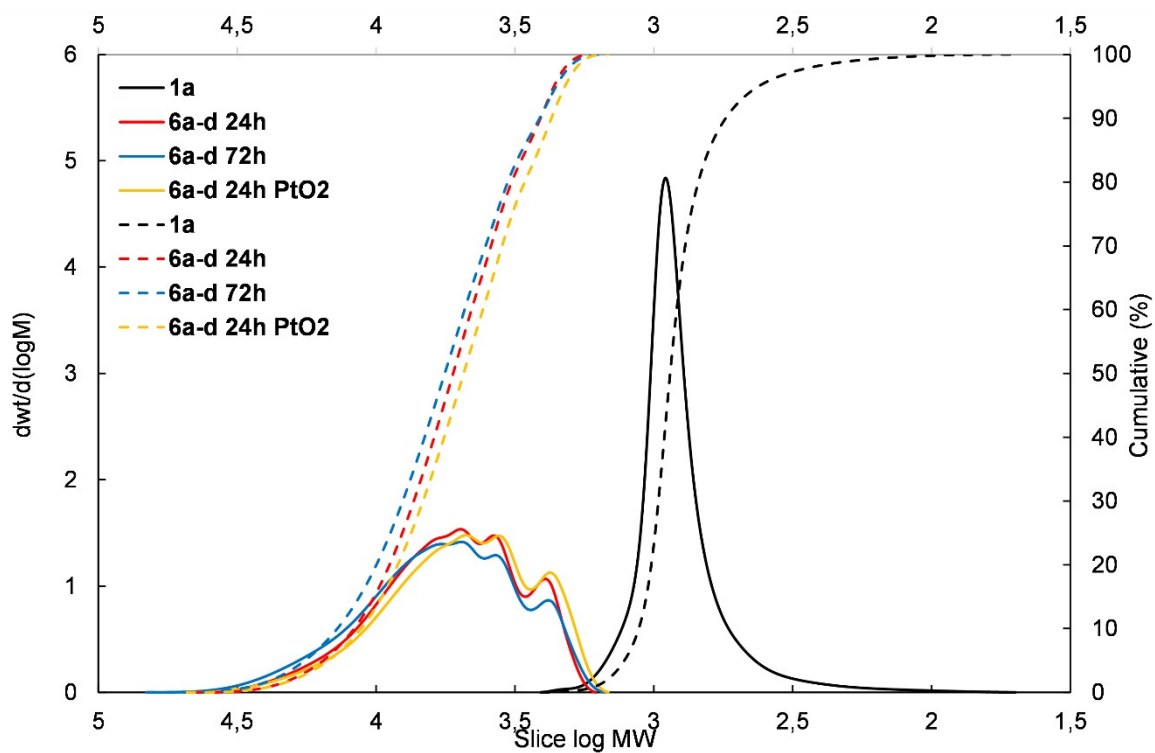

Figure S40 Molecular weight distribution plot of 6a-d.

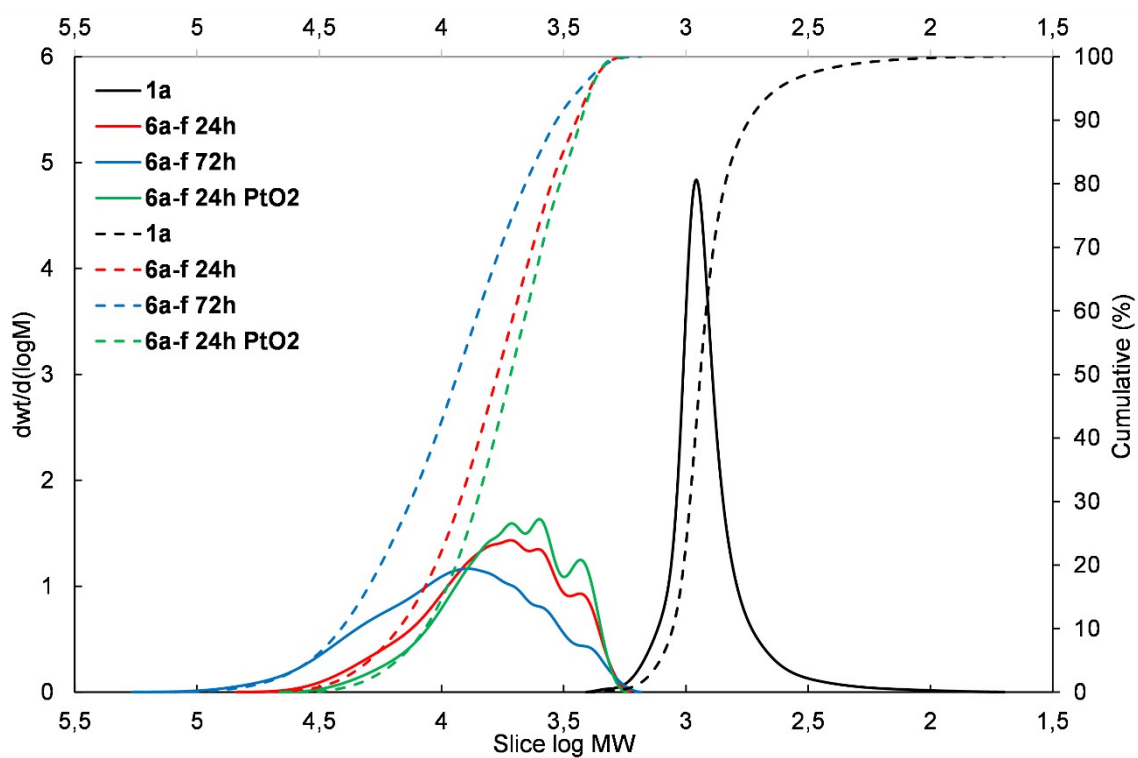

Figure S41 Molecular weight distribution plot of 6a-f.

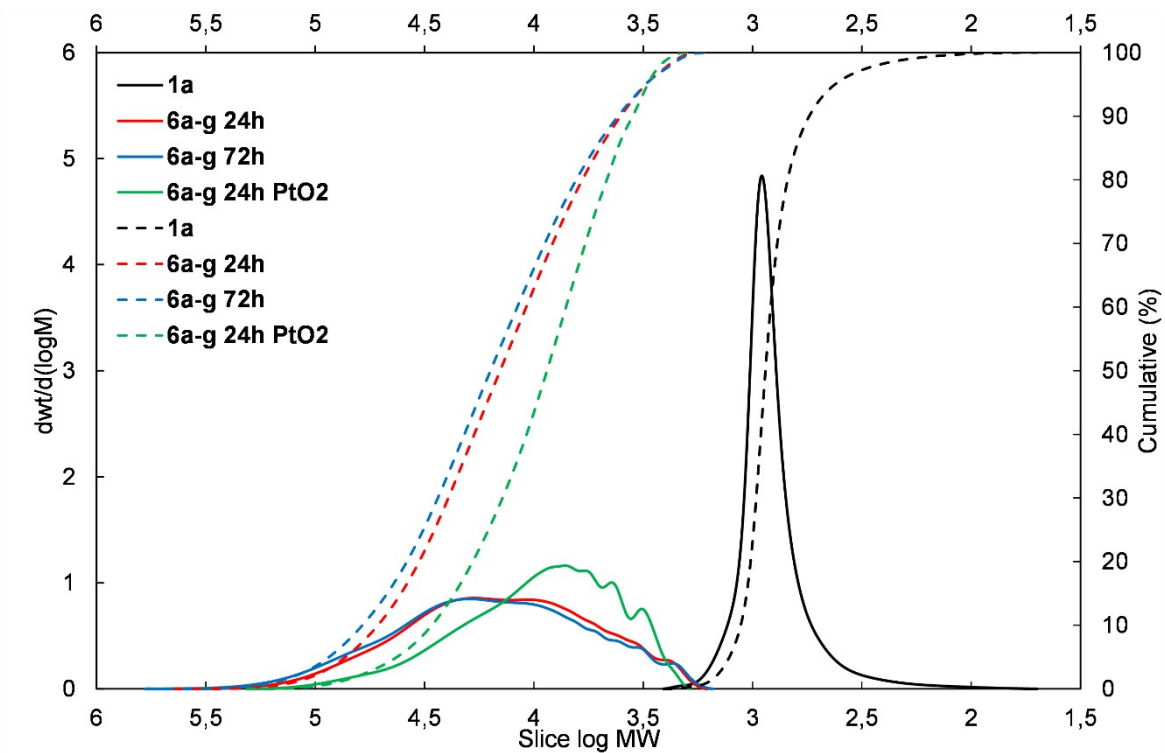

Figure S42 Molecular weight distribution plot of 6a-g.

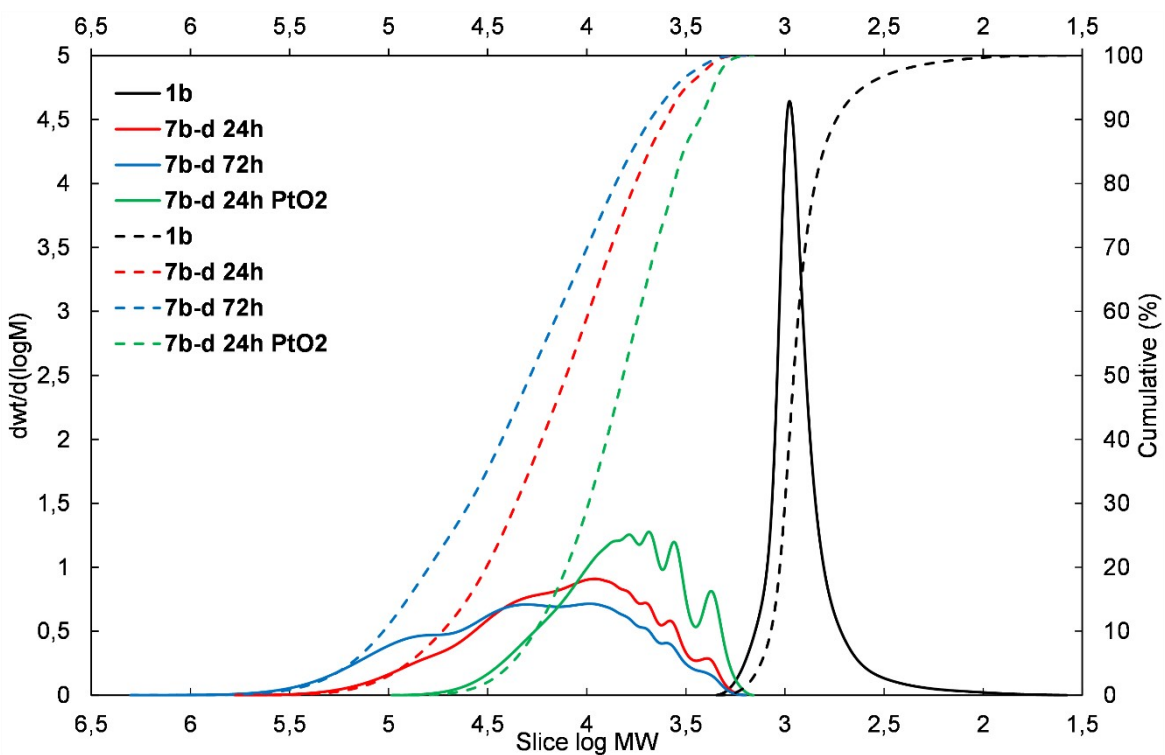

Figure S43 Molecular weight distribution plot of 7b-d.

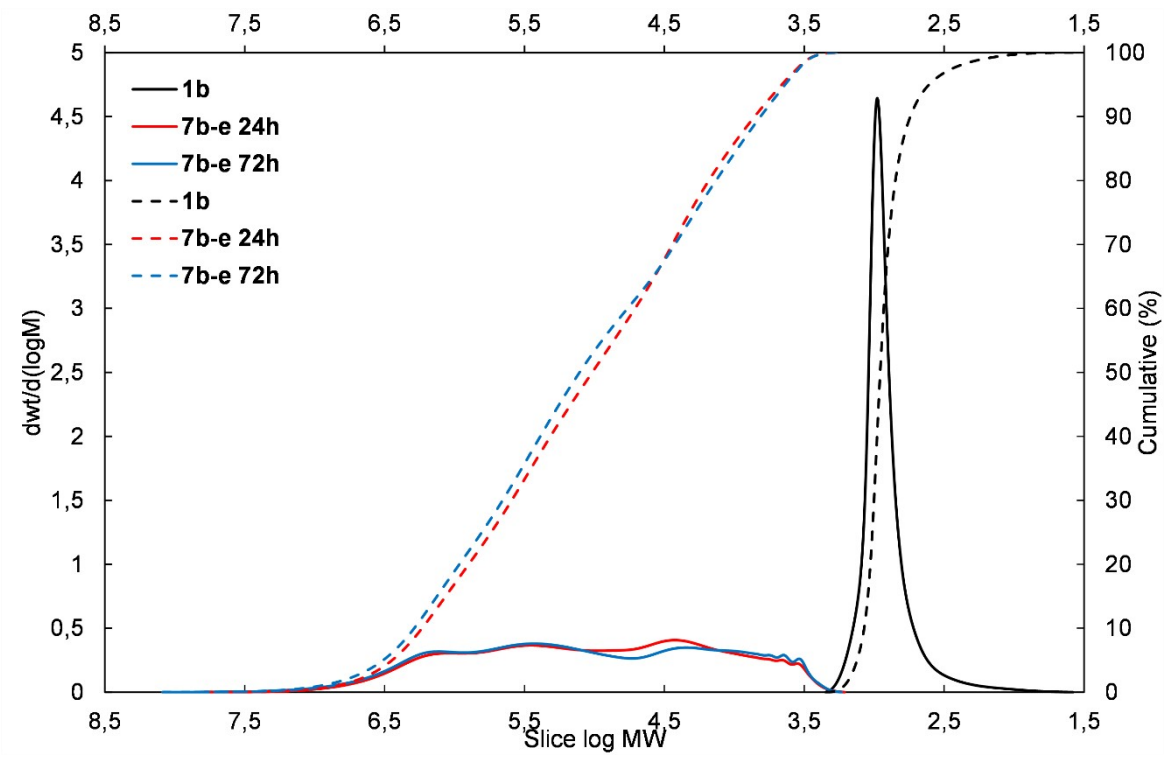

Figure S44 Molecular weight distribution plot of 7b-e.

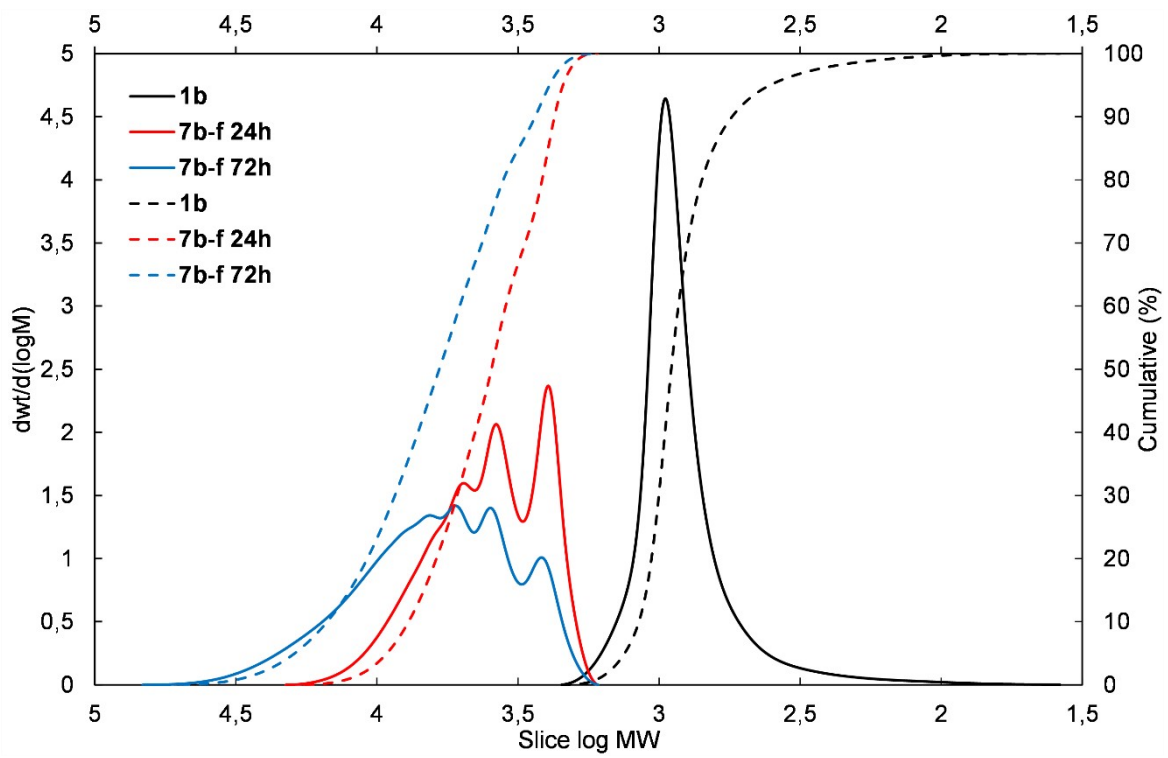

Figure S45 Molecular weight distribution plot of 7b-f.

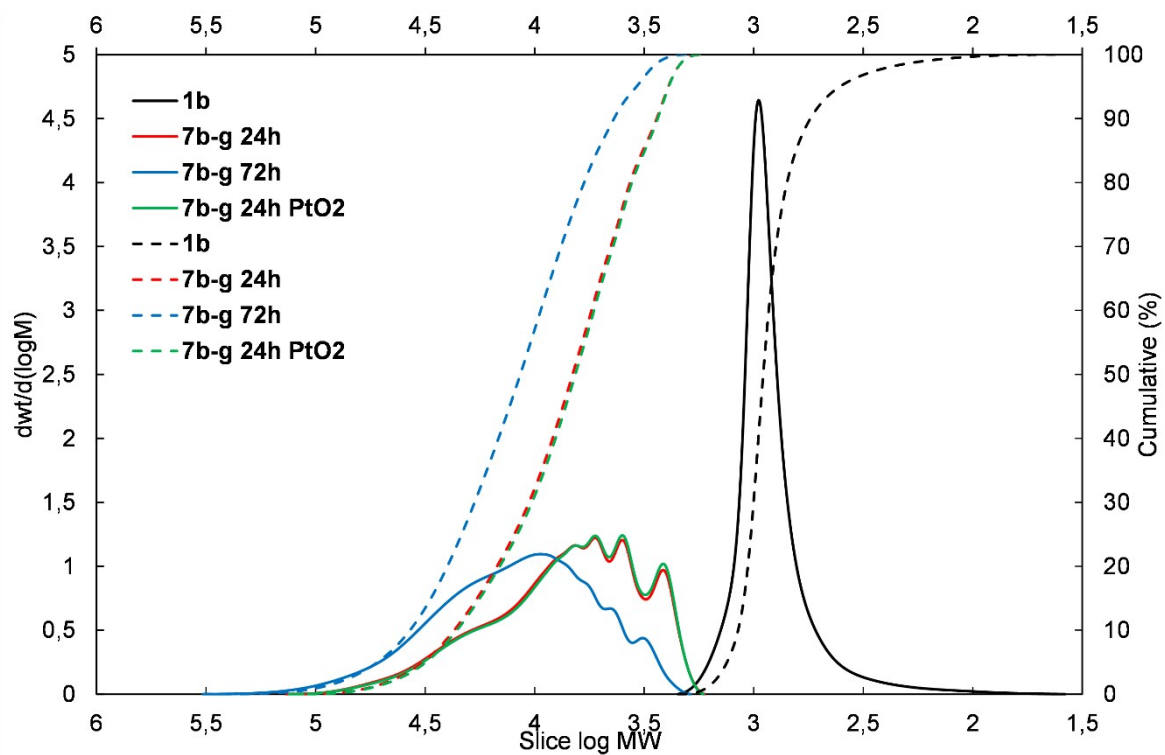

Figure S46 Molecular weight distribution plot of **7b-g**.

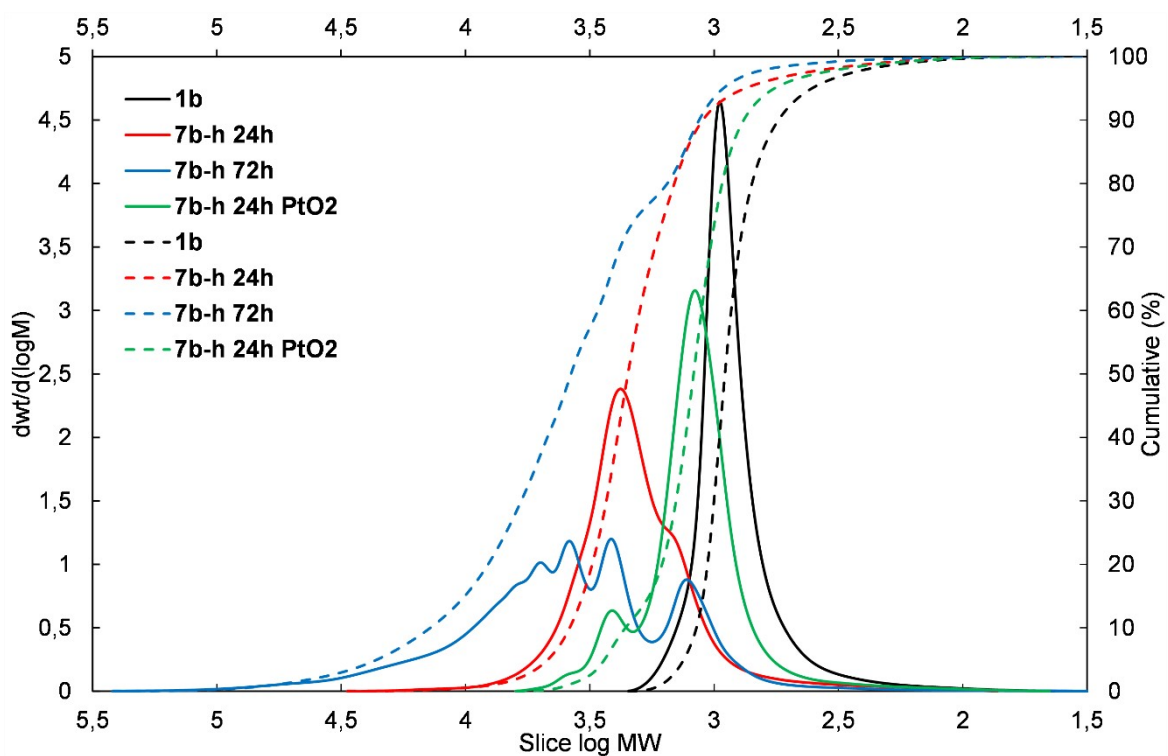

Figure S47 Molecular weight distribution plot of **7b-h**.

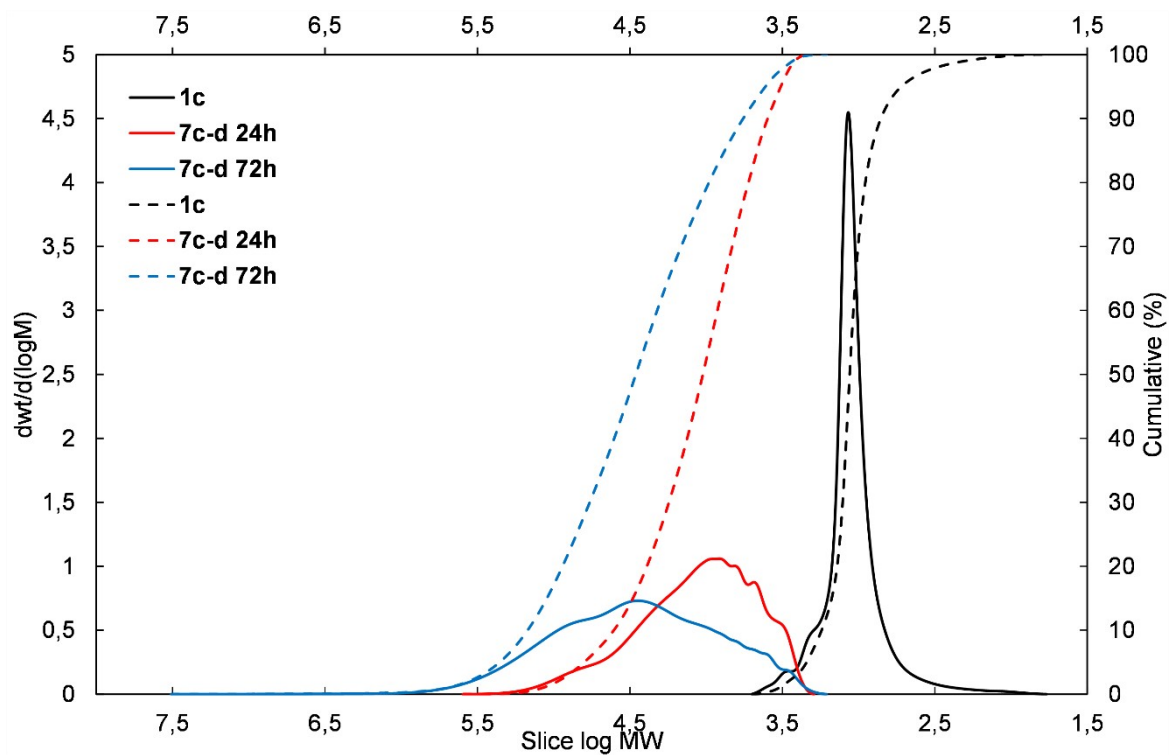

Figure S48 Molecular weight distribution plot of 7c-d.

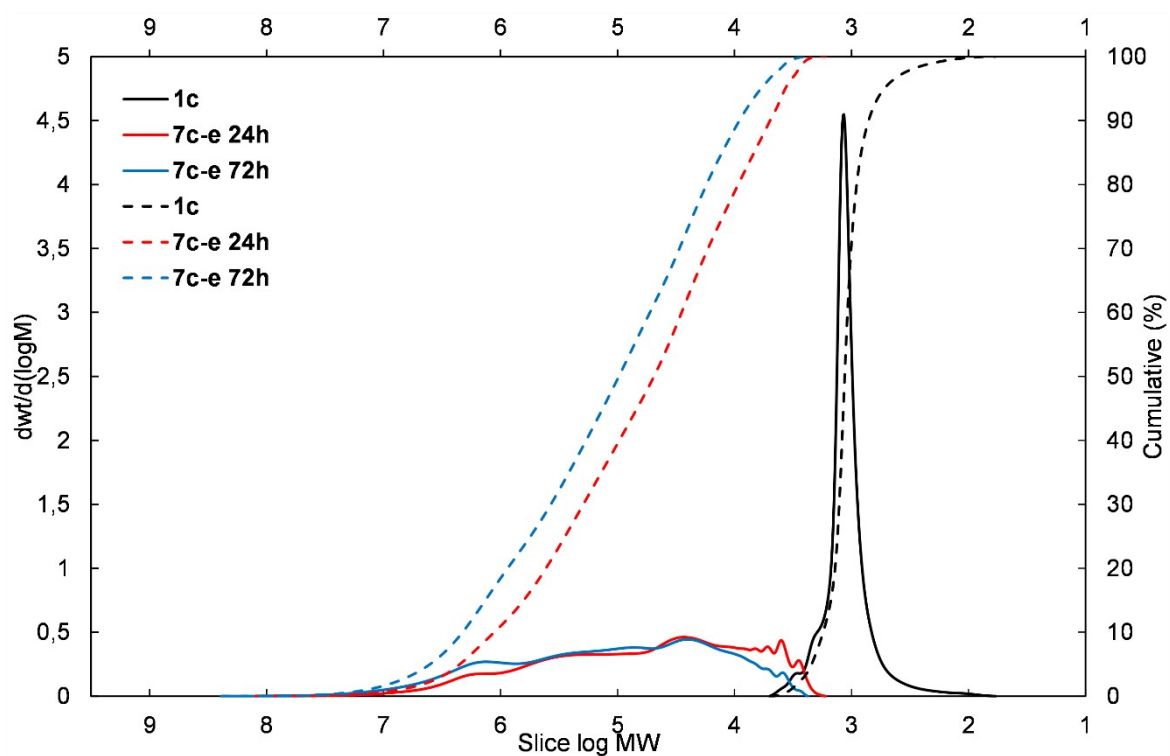

Figure S49 Molecular weight distribution plot of 7c-e.

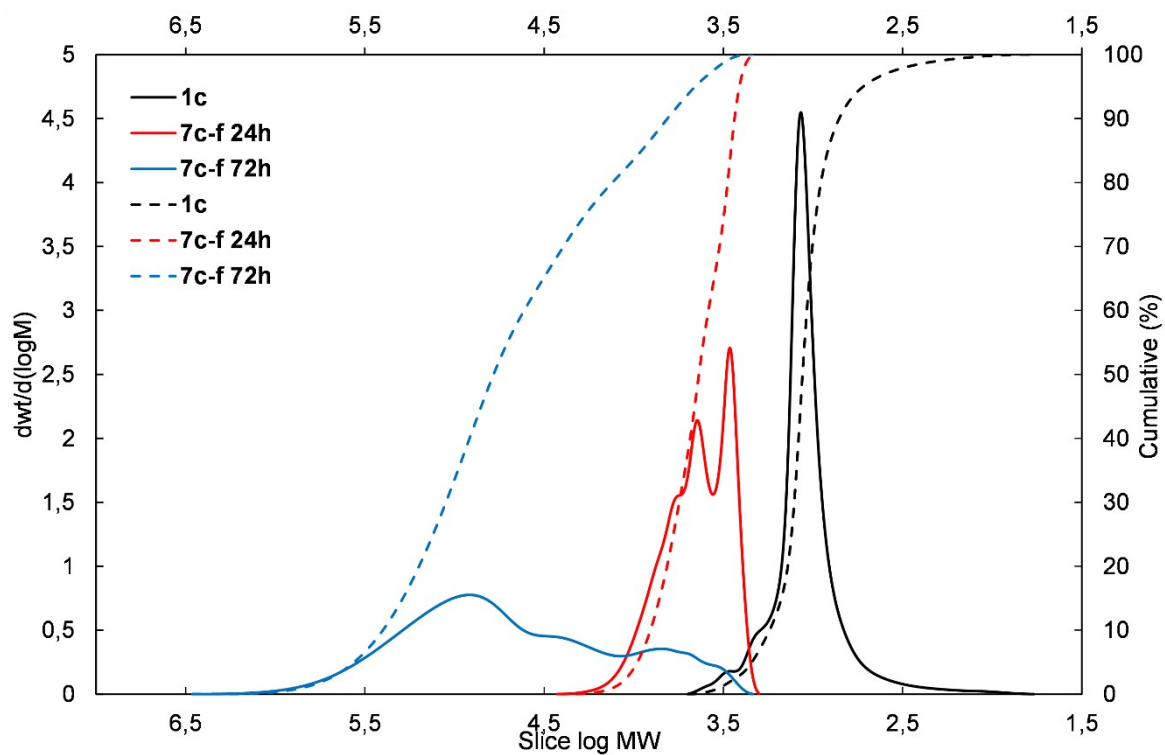

Figure S50 Molecular weight distribution plot of 7c-f.

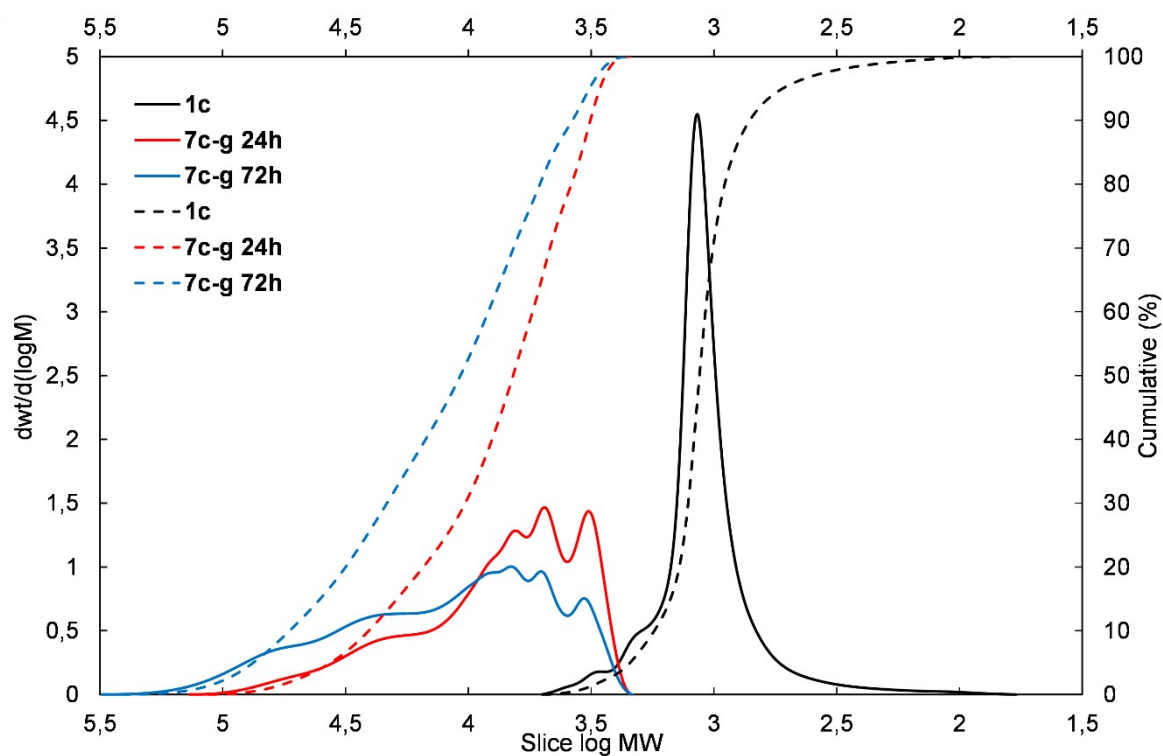

Figure S51 Molecular weight distribution plot of 7c-g.



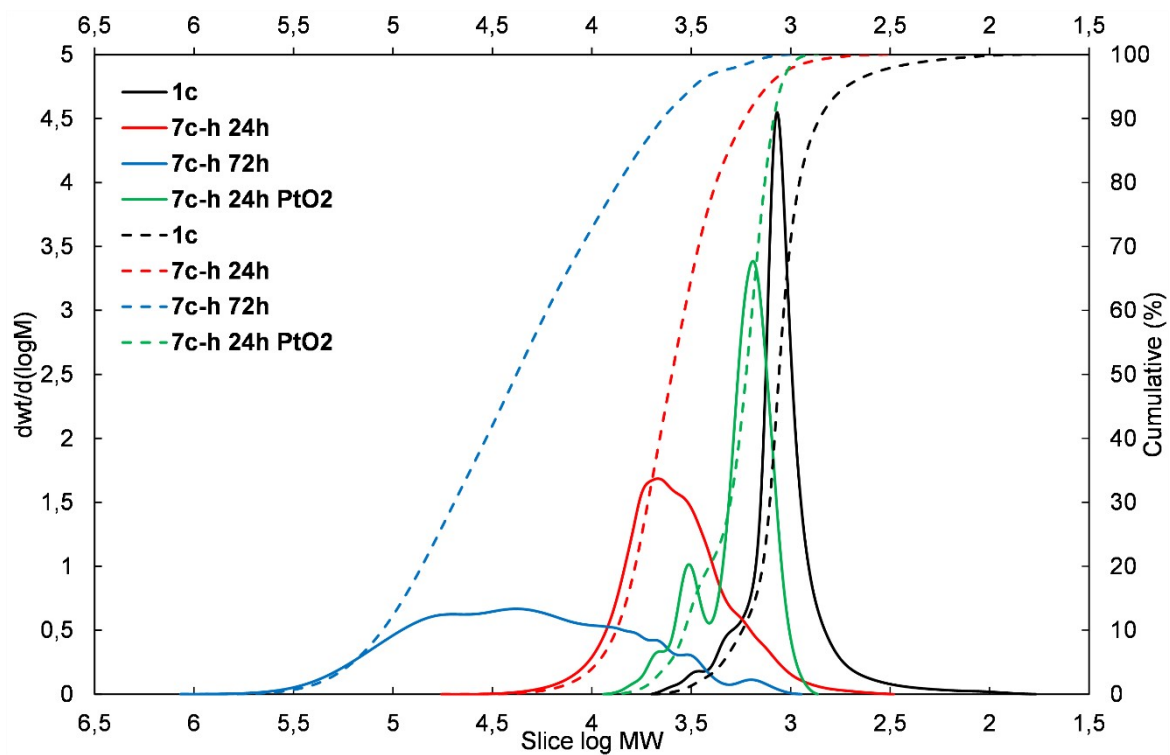

Figure S52 Molecular weight distribution plot of 7c-h.

## 6. TGA analysis of obtained products

Table S3. Thermal properties of DDSQ substrates (**1a-c**) and respective copolymeric products **7b-(d-h)** and **7c-(d-h)**.

| Entry | Product         | DDSQ                                                                                |  | Mass loss temperature [°C]                                                          |              | Residue at 1000°C [%] |    |
|-------|-----------------|-------------------------------------------------------------------------------------|-----------------------------------------------------------------------------------|-------------------------------------------------------------------------------------|--------------|-----------------------|----|
|       |                 |                                                                                     |                                                                                   | $T_d^{5\%}$                                                                         | $T_d^{10\%}$ |                       |    |
| 1     | -               | <b>1a</b>                                                                           | -                                                                                 | 373                                                                                 | 400          | 41                    |    |
| 2     | -               | <b>1b</b>                                                                           | -                                                                                 | 541                                                                                 | 569          | 49                    |    |
| 3     | -               | <b>1c</b>                                                                           | -                                                                                 | 490                                                                                 | 534          | 48                    |    |
| 4     | <b>7b-d 24h</b> | <b>1b</b>                                                                           |  | 151                                                                                 | 183          | 46                    |    |
| 5     | <b>7b-d 72h</b> |                                                                                     | (d)                                                                               | 139                                                                                 | 173          | 45                    |    |
| 6     | <b>7b-e 24h</b> |                                                                                     |  | 366                                                                                 | 481          | 50                    |    |
| 7     | <b>7b-e 72h</b> |                                                                                     | (e)                                                                               | 159                                                                                 | 210          | 48                    |    |
| 8     | <b>7b-f 24h</b> |                                                                                     |  | 258                                                                                 | 451          | 46                    |    |
| 9     | <b>7b-f 72h</b> |                                                                                     | (f)                                                                               | 363                                                                                 | 465          | 46                    |    |
| 10    | <b>7b-g 24h</b> |                                                                                     |  | 493                                                                                 | 541          | 56                    |    |
| 11    | <b>7b-g 72h</b> |                                                                                     | (g)                                                                               | 170                                                                                 | 278          | 44                    |    |
| 12    | <b>7b-h 24h</b> |                                                                                     |  | 437                                                                                 | 489          | 54                    |    |
| 13    | <b>7b-h 72h</b> |                                                                                     | (h)                                                                               | 498                                                                                 | 541          | 54                    |    |
| 14    | <b>7c-d 24h</b> |                                                                                     | <b>1c</b>                                                                         |  | 397          | 443                   | 43 |
| 15    | <b>7c-d 72h</b> |                                                                                     |                                                                                   | (d)                                                                                 | 253          | 355                   | 41 |
| 16    | <b>7c-e 24h</b> |  |                                                                                   | 325                                                                                 | 404          | 53                    |    |
| 17    | <b>7c-e 72h</b> | (e)                                                                                 |                                                                                   | 132                                                                                 | 152          | 33                    |    |
| 18    | <b>7c-f 24h</b> |  |                                                                                   | 233                                                                                 | 471          | 49                    |    |
| 19    | <b>7c-f 72h</b> | (f)                                                                                 |                                                                                   | 400                                                                                 | 457          | 50                    |    |
| 20    | <b>7c-g 24h</b> |  |                                                                                   | 303                                                                                 | 390          | 43                    |    |
| 21    | <b>7c-g 72h</b> | (g)                                                                                 |                                                                                   | 229                                                                                 | 285          | 35                    |    |
| 22    | <b>7c-h 24h</b> |  |                                                                                   | 375                                                                                 | 456          | 53                    |    |
| 23    | <b>7c-h 72h</b> | (h)                                                                                 |                                                                                   | 462                                                                                 | 511          | 55                    |    |

## 7. Solubility tests of selected products

Table S4. Solubility of **7b-g-24h** and **7c-g-24h** compounds with different DDSQ core varying in additional -OSi(Me<sub>2</sub>)- linkage.

| Sample       | 7b-g-24h                          | 7c-g-24h |
|--------------|-----------------------------------|----------|
| Solvent      | Amount of solvent used [ $\mu$ L] |          |
| DCM          | 60                                | 100-150  |
| Acetone      | 70                                | 1000 (+) |
| THF          | 70                                | 1000     |
| Hexane       | 1000 (-)                          | 1000 (-) |
| Methanol     | 1000 (-)                          | 1000 (-) |
| Acetonitrile | 1000 (-)                          | 1000 (-) |

Solubility at room temperature for 0.021g sample to obtain a transparent solution. (+) soluble after sonication, (-) insoluble even after sonication.

## 8. Young's Modulus and Hardness

Table S5. A list of Young's Modulus and Hardness values for measured samples

| Entry | Sample      | DDSQ      |         | Young's modulus [GPa] | Hardness [GPa] |
|-------|-------------|-----------|--------------------------------------------------------------------------------------------|-----------------------|----------------|
| 1     | <b>6a-g</b> | <b>1a</b> | <br>(g) | 4.48±0.74             | 0.137±0.005    |
| 2     | <b>7b-d</b> | <b>1b</b> | <br>(d) | 2.81±0.49             | 0.098±0.003    |
| 3     | <b>7b-e</b> | <b>1b</b> | <br>(e) | 2.18±0.02             | 0.078±0.001    |
| 4     | <b>7b-f</b> | <b>1b</b> | <br>(f) | 3.56±0.10             | 0.121±0.002    |
| 5     | <b>7c-f</b> | <b>1c</b> | <br>(f) | 2.24±0.05             | 0.071±0.003    |

Samples were prepared on glass plates deposited from 5% DCM solution.

## 9. References

- [1] P. Źak, B. Dudziec, M. Kubicki, B. Marciniak, Silylative Coupling versus Metathesis-Efficient Methods for the Synthesis of Difunctionalized Double-Decker Silsesquioxane Derivatives, *Chem. - A Eur. J.*, 2014, **20**, 9387–9393.
- [2] M. Walczak, R. Januszewski, M. Majchrzak, M. Kubicki, B. Dudziec, B. Marciniak, Unusual cis and transfile architecture of dihydrofunctional double-decker shaped silsesquioxane and synthesis of its ethyl bridged &#x3c0;-conjugated arene derivatives, *New J. Chem.* 2017, **41**, 3290–3296.
- [3] D. Brz&#x3aakalski, M. Walczak, J. Duszczyk, B. Dudziec, B. Marciniak, Chlorine-Free Catalytic Formation of Silsesquioxanes with Si-OH and Si-OR Functional Groups, *Eur. J. Inorg. Chem.*, 2018, 4905–4910.
- [4] K. Cao, L. Yang, Y. Huang, G. Chang, J. Yang, High temperature thermosets derived from benzocyclobutene-containing main-chain oligomeric carbosilanes, *Polymer (Guildf)*., 2014, **55**, 5680–5688.
- [5] B. Marciniak, E. Ma&#x142;ecka, M. Źcibiorek, Synthesis of silylene-alkylene-silylene-vinylene polymers via catalytic silylative coupling (SC) polycondensation, *Macromolecules*, 2003, **36**, 5545–5550.
- [6] H. Xie, J. Lu, Y. Gui, L. Gao, Z. Song, (HMe<sub>2</sub>SiCH<sub>2</sub>)<sub>2</sub>: A Useful Reagent for B(C<sub>6</sub>F<sub>5</sub>)<sub>3</sub>-Catalyzed Reduction-Lactonization of Keto Acids: Concise Syntheses of (-)- cis -Whisky and (-)- cis -Cognac Lactones, *Synlett*, 2017, **28**, 2453–2459.
- [7] Agilent Technologies, CrysAlisPro (Version 1.171.33.36d), Agil. Technol. Ltd, UK. 2011.
- [8] G.M. Sheldrick, SHELXT - Integrated space-group and crystal-structure determination, *Acta Crystallogr. Sect. A Found. Crystallogr.* 71 (2015) 3–8. doi:10.1107/S2053273314026370.
- [9] G.M. Sheldrick, Crystal structure refinement with SHELXL, *Acta Crystallogr. Sect. C Struct. Chem.*, 2015, **71**, 3–8. doi:10.1107/S2053229614024218.
- [10] M.R. Vanlandingham, J.S. Villarrubia, W.F. Guthrie, G.F. Meyers, Nanoindentation of Polymers : A review, *Macromol. Symp.*, 2001, **167**, 15–43.
- [11] P.L. Larsson, S. Carlsson, On Microindentation of Viscoelastic Polymers, *Polym. Test.*, 1998, **17**, 49–75.
- [12] W.C. Oliver, G.M. Pharr, An improved technique for determining hardness and elastic modulus using load and displacement sensing indentation experiments, *J. Mater. Res.*, 1992, **7**, 1564–1583.
